# Supplementary material
Source: publisher site journal article supplement (https://www.spandidos-publications.com/2136/downloadSupplementary)
Supplement: Supplementary file 1 [file downloadSupplementary]

## Sheet: Supplementary table II
Table SII. Differentially expressed biological processes of GO enrichment.
maxLevel	levels	GO_Name	GO_ID	Pvalue	Pvalue_adjusted	PAS_Value	PAS_Zscore	max_zscore	min_zscore	Genes	Count	Pop_Hit	List_Total	Background_Genes	URL
2	2	behavior	GO:0007610	1.58×10-2	5.73×10-2	-0.99	-0.21	1.05743	-10.6873	GIGYF2|1.72;ITGA5|0.73;HDAC2|0.73;GLS|0.72;C1QBP|0.7;PARP1|0.66	6	724	107	38520	http://www.ebi.ac.uk/QuickGO/GTerm?id=GO:0007610
2	2	biological regulation	GO:0065007	4.78×10-2	1.07×10-1	-11.88	-7.02	1.05743	-10.6873	NDRG1|1.88;CDKN2A|1.86;GTF2F1|1.8;PSMA1|1.74;GIGYF2|1.72;SLK|1.69;STMN1|1.67;CLIP1|1.66;TMEM109|1.61;DBNL|1.6;S100A11|1.58;SRI|1.57;PPP1R12A|1.54;UBE2K|1.53;S100A6|1.52;SFXN3|0.74;LPCAT1|0.74;ATP6V0D1|0.74;AIFM1|0.74;PDHA1|0.74;SMARCA4|0.74;BSG|0.73;DLD|0.73;ALCAM|0.73;ITGA5|0.73;HDAC2|0.73;SLTM|0.73;YBX3|0.72;SERPINH1|0.72;GLS|0.72;TRRAP|0.72;KIF2A|0.71;C1QBP|0.7;CYBA|0.7;SMARCA5|0.7;CTSS|0.7;ND…	65	20133	107	38520	http://www.ebi.ac.uk/QuickGO/GTerm?id=GO:0065007
2	2	cellular component organization or biogenesis	GO:0071840	1.28×10-7	1.60×10-5	-8.91	-5.16	1.05743	-10.6873	NDRG1|1.88;CDKN2A|1.86;STMN1|1.67;CLIP1|1.66;DBNL|1.6;PPP1R12A|1.54;S100A6|1.52;DDOST|0.74;MRPL21|0.74;ATP6V0D1|0.74;AIFM1|0.74;SMARCA4|0.74;OAT|0.73;BSG|0.73;ACP2|0.73;ALCAM|0.73;ITGA5|0.73;HDAC2|0.73;MRPL54|0.72;SERPINH1|0.72;GLS|0.72;TRRAP|0.72;TUFM|0.71;HM13|0.71;KIF2A|0.71;C1QBP|0.7;CYBA|0.7;LSG1|0.7;SMARCA5|0.7;CTSS|0.7;NDUFA13|0.7;NUP210|0.69;CDK1|0.69;ATP1B1|0.69;DNAJA3|0.69;PNPT1|0.69;US…	51	9364	107	38520	http://www.ebi.ac.uk/QuickGO/GTerm?id=GO:0071840
2	2	cellular process	GO:0009987	4.95×10-4	6.43×10-3	-17.76	-10.69	1.05743	-10.6873	NDRG1|1.88;CDKN2A|1.86;GTF2F1|1.8;PSMA1|1.74;GIGYF2|1.72;SLK|1.69;SRRM1|1.69;STMN1|1.67;CLIP1|1.66;TMEM109|1.61;DBNL|1.6;S100A11|1.58;SRI|1.57;PPP1R12A|1.54;UBE2K|1.53;S100A6|1.52;TAGLN2|1.51;DDOST|0.74;SFXN3|0.74;LPCAT1|0.74;SLC25A1|0.74;MRPL21|0.74;TECR|0.74;ATP6V0D1|0.74;AIFM1|0.74;MUT|0.74;PDHA1|0.74;SMARCA4|0.74;OAT|0.73;FKBP10|0.73;BSG|0.73;ACP2|0.73;DLD|0.73;ALCAM|0.73;ITGA5|0.73;STT3A|0.7…	101	32069	107	38520	http://www.ebi.ac.uk/QuickGO/GTerm?id=GO:0009987
2	2	developmental process	GO:0032502	5.35×10-6	2.25×10-4	-7.24	-4.12	1.05743	-10.6873	NDRG1|1.88;CDKN2A|1.86;GIGYF2|1.72;STMN1|1.67;DBNL|1.6;SRI|1.57;S100A6|1.52;TAGLN2|1.51;LPCAT1|0.74;ATP6V0D1|0.74;AIFM1|0.74;MUT|0.74;SMARCA4|0.74;BSG|0.73;ACP2|0.73;DLD|0.73;ALCAM|0.73;ITGA5|0.73;HDAC2|0.73;YBX3|0.72;SERPINH1|0.72;KIF2A|0.71;C1QBP|0.7;CSPG4|0.69;CDK1|0.69;DNAJA3|0.69;PNPT1|0.69;TOP1|0.68;POLDIP2|0.68;PHB2|0.67;PARP1|0.66;MYDGF|0.65;ITGB4|0.65;SLC7A5|0.63;ASPH|0.63;TOP2A|0.6;ERO1…	40	7255	107	38520	http://www.ebi.ac.uk/QuickGO/GTerm?id=GO:0032502
2	2	growth	GO:0040007	8.33×10-3	3.76×10-2	-1.43	-0.49	1.05743	-10.6873	CDKN2A|1.86;GIGYF2|1.72;SMARCA4|0.74;YBX3|0.72;CYBA|0.7;NDUFA13|0.7;PNPT1|0.69;PARP1|0.66	8	1035	107	38520	http://www.ebi.ac.uk/QuickGO/GTerm?id=GO:0040007
2	2	immune system process	GO:0002376	3.78×10-3	2.42×10-2	-3.32	-1.67	1.05743	-10.6873	NDRG1|1.88;PSMA1|1.74;DBNL|1.6;DDOST|0.74;BSG|0.73;ITGA5|0.73;KIF2A|0.71;C1QBP|0.7;CYBA|0.7;CTSS|0.7;CDK1|0.69;ATP1B1|0.69;DNAJA3|0.69;PHB2|0.67;PARP1|0.66;SLC7A5|0.63;TOP2A|0.6;CD44|0.47	18	3265	107	38520	http://www.ebi.ac.uk/QuickGO/GTerm?id=GO:0002376
2	2	localization	GO:0051179	6.81×10-3	3.43×10-2	-7.09	-4.03	1.05743	-10.6873	SRRM1|1.69;STMN1|1.67;CLIP1|1.66;DBNL|1.6;SRI|1.57;PPP1R12A|1.54;S100A6|1.52;DDOST|0.74;SFXN3|0.74;SLC25A1|0.74;ATP6V0D1|0.74;BSG|0.73;ITGA5|0.73;ATP5L|0.72;GLS|0.72;HM13|0.71;C1QBP|0.7;CYBA|0.7;LSG1|0.7;CTSS|0.7;NDUFA13|0.7;CSPG4|0.69;NUP210|0.69;CDK1|0.69;ATP1B1|0.69;DNAJA3|0.69;PNPT1|0.69;HYOU1|0.69;SEC62|0.68;PHB2|0.67;PARP1|0.66;ITGB4|0.65;SLC7A5|0.63;ASPH|0.63;SERINC1|0.62;GOLIM4|0.62;SLCO3…	40	10064	107	38520	http://www.ebi.ac.uk/QuickGO/GTerm?id=GO:0051179
2	2	metabolic process	GO:0008152	1.63×10-6	8.96×10-5	-16.36	-9.82	1.05743	-10.6873	CDKN2A|1.86;GTF2F1|1.8;PSMA1|1.74;GIGYF2|1.72;SLK|1.69;SRRM1|1.69;DBNL|1.6;S100A11|1.58;SRI|1.57;PPP1R12A|1.54;UBE2K|1.53;DDOST|0.74;LPCAT1|0.74;SLC25A1|0.74;MRPL21|0.74;TECR|0.74;ATP6V0D1|0.74;AIFM1|0.74;APMAP|0.74;MUT|0.74;PDHA1|0.74;SMARCA4|0.74;OAT|0.73;FKBP10|0.73;BSG|0.73;ACP2|0.73;DLD|0.73;ITGA5|0.73;STT3A|0.73;HDAC2|0.73;GNS|0.73;SLTM|0.73;ECH1|0.72;MRPL54|0.72;NARS2|0.72;ATP5L|0.72;YBX3|…	95	26672	107	38520	http://www.ebi.ac.uk/QuickGO/GTerm?id=GO:0008152
2	2	multicellular organismal process	GO:0032501	2.18×10-4	3.63×10-3	-6.73	-3.8	1.05743	-10.6873	NDRG1|1.88;GIGYF2|1.72;STMN1|1.67;DBNL|1.6;SRI|1.57;S100A6|1.52;LPCAT1|0.74;ATP6V0D1|0.74;AIFM1|0.74;MUT|0.74;SMARCA4|0.74;OAT|0.73;BSG|0.73;ACP2|0.73;DLD|0.73;ALCAM|0.73;ITGA5|0.73;HDAC2|0.73;YBX3|0.72;SERPINH1|0.72;GLS|0.72;KIF2A|0.71;C1QBP|0.7;CYBA|0.7;CTSS|0.7;CSPG4|0.69;CDK1|0.69;ATP1B1|0.69;DNAJA3|0.69;TOP1|0.68;PHB2|0.67;PARP1|0.66;MYDGF|0.65;ITGB4|0.65;SLC7A5|0.63;ASPH|0.63;TOP2A|0.6;HSD1…	39	8180	107	38520	http://www.ebi.ac.uk/QuickGO/GTerm?id=GO:0032501
2	2	multi-organism process	GO:0051704	9.11×10-5	1.92×10-3	-3.3	-1.66	1.05743	-10.6873	GTF2F1|1.8;PSMA1|1.74;STMN1|1.67;ATP6V0D1|0.74;SMARCA4|0.74;BSG|0.73;DLD|0.73;ITGA5|0.73;HDAC2|0.73;YBX3|0.72;GLS|0.72;C1QBP|0.7;CYBA|0.7;NUP210|0.69;CDK1|0.69;ATP1B1|0.69;TOP1|0.68;TOP2A|0.6;SSRP1|0.5	19	2595	107	38520	http://www.ebi.ac.uk/QuickGO/GTerm?id=GO:0051704
2	2	negative regulation of biological process	GO:0048519	7.31×10-6	2.73×10-4	-6.12	-3.42	1.05743	-10.6873	NDRG1|1.88;CDKN2A|1.86;PSMA1|1.74;GIGYF2|1.72;STMN1|1.67;TMEM109|1.61;S100A11|1.58;SRI|1.57;PPP1R12A|1.54;LPCAT1|0.74;SMARCA4|0.74;ITGA5|0.73;HDAC2|0.73;YBX3|0.72;SERPINH1|0.72;TRRAP|0.72;C1QBP|0.7;CYBA|0.7;SMARCA5|0.7;NDUFA13|0.7;ERLIN1|0.69;CDK1|0.69;DNAJA3|0.69;PNPT1|0.69;HYOU1|0.69;AURKAIP1|0.68;PHB2|0.67;PARP1|0.66;MYDGF|0.65;ASPH|0.63;TOP2A|0.6;ERO1L|0.58;CD44|0.47	33	5444	107	38520	http://www.ebi.ac.uk/QuickGO/GTerm?id=GO:0048519
2	2	positive regulation of biological process	GO:0048518	4.10×10-5	1.04×10-3	-7.02	-3.98	1.05743	-10.6873	NDRG1|1.88;CDKN2A|1.86;GTF2F1|1.8;PSMA1|1.74;SLK|1.69;STMN1|1.67;CLIP1|1.66;DBNL|1.6;SRI|1.57;PPP1R12A|1.54;S100A6|1.52;LPCAT1|0.74;AIFM1|0.74;SMARCA4|0.74;ITGA5|0.73;HDAC2|0.73;YBX3|0.72;C1QBP|0.7;CYBA|0.7;CTSS|0.7;NDUFA13|0.7;CSPG4|0.69;ERLIN1|0.69;CDK1|0.69;ATP1B1|0.69;DNAJA3|0.69;PNPT1|0.69;AURKAIP1|0.68;PHB2|0.67;CLPX|0.67;PARP1|0.66;MYDGF|0.65;ASPH|0.63;SERINC1|0.62;TOP2A|0.6;SSRP1|0.5;CD44…	37	7022	107	38520	http://www.ebi.ac.uk/QuickGO/GTerm?id=GO:0048518
2	2	reproductive process	GO:0022414	1.04×10-2	4.42×10-2	-1.63	-0.62	1.05743	-10.6873	SMARCA4|0.74;BSG|0.73;DLD|0.73;YBX3|0.72;C1QBP|0.7;CDK1|0.69;PHB2|0.67;HSD17B4|0.54;CD44|0.47	9	1301	107	38520	http://www.ebi.ac.uk/QuickGO/GTerm?id=GO:0022414
2	2	response to stimulus	GO:0050896	1.05×10-4	2.15×10-3	-10.18	-5.95	1.05743	-10.6873	NDRG1|1.88;CDKN2A|1.86;GTF2F1|1.8;PSMA1|1.74;GIGYF2|1.72;SLK|1.69;STMN1|1.67;CLIP1|1.66;TMEM109|1.61;DBNL|1.6;S100A11|1.58;SRI|1.57;PPP1R12A|1.54;UBE2K|1.53;S100A6|1.52;DDOST|0.74;ATP6V0D1|0.74;AIFM1|0.74;SMARCA4|0.74;BSG|0.73;ACP2|0.73;ALCAM|0.73;ITGA5|0.73;HDAC2|0.73;YBX3|0.72;SERPINH1|0.72;TRRAP|0.72;HM13|0.71;KIF2A|0.71;NDUFA10|0.71;C1QBP|0.7;CYBA|0.7;SMARCA5|0.7;CTSS|0.7;NDUFA13|0.7;CSPG4|0.…	56	13260	107	38520	http://www.ebi.ac.uk/QuickGO/GTerm?id=GO:0050896
2	2	signaling	GO:0023052	9.49×10-4	1.06×10-2	-7.83	-4.49	1.05743	-10.6873	NDRG1|1.88;CDKN2A|1.86;PSMA1|1.74;GIGYF2|1.72;SLK|1.69;STMN1|1.67;CLIP1|1.66;TMEM109|1.61;DBNL|1.6;S100A11|1.58;SRI|1.57;PPP1R12A|1.54;UBE2K|1.53;S100A6|1.52;ATP6V0D1|0.74;AIFM1|0.74;SMARCA4|0.74;BSG|0.73;ALCAM|0.73;ITGA5|0.73;HDAC2|0.73;YBX3|0.72;GLS|0.72;KIF2A|0.71;C1QBP|0.7;CYBA|0.7;CTSS|0.7;NDUFA13|0.7;CSPG4|0.69;NUP210|0.69;ERLIN1|0.69;CDK1|0.69;ATP1B1|0.69;DNAJA3|0.69;HYOU1|0.69;SEC62|0.68;…	43	10025	107	38520	http://www.ebi.ac.uk/QuickGO/GTerm?id=GO:0023052
2	2	single-organism process	GO:0044699	4.44×10-8	6.99×10-6	-16.69	-10.02	1.05743	-10.6873	NDRG1|1.88;CDKN2A|1.86;PSMA1|1.74;GIGYF2|1.72;SLK|1.69;SRRM1|1.69;STMN1|1.67;CLIP1|1.66;TMEM109|1.61;DBNL|1.6;S100A11|1.58;SRI|1.57;PPP1R12A|1.54;UBE2K|1.53;S100A6|1.52;TAGLN2|1.51;DDOST|0.74;SFXN3|0.74;LPCAT1|0.74;SLC25A1|0.74;MRPL21|0.74;TECR|0.74;ATP6V0D1|0.74;AIFM1|0.74;MUT|0.74;PDHA1|0.74;SMARCA4|0.74;OAT|0.73;BSG|0.73;ACP2|0.73;DLD|0.73;ALCAM|0.73;ITGA5|0.73;STT3A|0.73;HDAC2|0.73;GNS|0.73;S…	96	25852	107	38520	http://www.ebi.ac.uk/QuickGO/GTerm?id=GO:0044699
3	3	activation of immune response	GO:0002253	1.74×10-2	5.96×10-2	-1.04	-0.25	1.05743	-10.6873	PSMA1|1.74;C1QBP|0.7;CYBA|0.7;CTSS|0.7;CDK1|0.69;PHB2|0.67	6	740	107	38520	http://www.ebi.ac.uk/QuickGO/GTerm?id=GO:0002253
3	3	anatomical structure development	GO:0048856	3.17×10-6	1.51×10-4	-6.6	-3.72	1.05743	-10.6873	NDRG1|1.88;GIGYF2|1.72;STMN1|1.67;DBNL|1.6;SRI|1.57;S100A6|1.52;TAGLN2|1.51;LPCAT1|0.74;ATP6V0D1|0.74;AIFM1|0.74;SMARCA4|0.74;BSG|0.73;ACP2|0.73;DLD|0.73;ALCAM|0.73;ITGA5|0.73;HDAC2|0.73;YBX3|0.72;SERPINH1|0.72;KIF2A|0.71;C1QBP|0.7;CSPG4|0.69;CDK1|0.69;DNAJA3|0.69;PNPT1|0.69;TOP1|0.68;POLDIP2|0.68;PHB2|0.67;PARP1|0.66;MYDGF|0.65;ITGB4|0.65;SLC7A5|0.63;ASPH|0.63;TOP2A|0.6;GSTK1|0.56;HSD17B4|0.54;C…	37	6288	107	38520	http://www.ebi.ac.uk/QuickGO/GTerm?id=GO:0048856
3	3	anatomical structure morphogenesis	GO:0009653	4.72×10-4	6.22×10-3	-3.45	-1.75	1.05743	-10.6873	STMN1|1.67;DBNL|1.6;S100A6|1.52;ATP6V0D1|0.74;BSG|0.73;DLD|0.73;ALCAM|0.73;ITGA5|0.73;HDAC2|0.73;SERPINH1|0.72;C1QBP|0.7;CSPG4|0.69;CDK1|0.69;PNPT1|0.69;POLDIP2|0.68;PHB2|0.67;MYDGF|0.65;ITGB4|0.65;ASPH|0.63;CD44|0.47	20	3197	107	38520	http://www.ebi.ac.uk/QuickGO/GTerm?id=GO:0009653
3	3	antigen processing and presentation	GO:0019882	2.12×10-2	6.84×10-2	-0.7	-0.03	1.05743	-10.6873	PSMA1|1.74;KIF2A|0.71;CYBA|0.7;CTSS|0.7	4	377	107	38520	http://www.ebi.ac.uk/QuickGO/GTerm?id=GO:0019882
3	3	biosynthetic process	GO:0009058	5.76×10-7	3.90×10-5	-9.53	-5.55	1.05743	-10.6873	CDKN2A|1.86;GTF2F1|1.8;GIGYF2|1.72;SRRM1|1.69;S100A11|1.58;PPP1R12A|1.54;DDOST|0.74;LPCAT1|0.74;SLC25A1|0.74;MRPL21|0.74;TECR|0.74;APMAP|0.74;PDHA1|0.74;SMARCA4|0.74;OAT|0.73;DLD|0.73;STT3A|0.73;HDAC2|0.73;SLTM|0.73;MRPL54|0.72;NARS2|0.72;ATP5L|0.72;YBX3|0.72;SERPINH1|0.72;GLS|0.72;TRRAP|0.72;TUFM|0.71;MLEC|0.71;PTPMT1|0.71;NDUFA10|0.71;C1QBP|0.7;CYBA|0.7;SMARCA5|0.7;NDUFA13|0.7;CARS2|0.7;CSPG4|0…	56	11337	107	38520	http://www.ebi.ac.uk/QuickGO/GTerm?id=GO:0009058
3	3	catabolic process	GO:0009056	1.56×10-7	1.71×10-5	-4.81	-2.6	1.05743	-10.6873	PSMA1|1.74;UBE2K|1.53;LPCAT1|0.74;AIFM1|0.74;MUT|0.74;PDHA1|0.74;DLD|0.73;GNS|0.73;ECH1|0.72;GLS|0.72;HM13|0.71;PTPMT1|0.71;CTSS|0.7;NDUFA13|0.7;CSPG4|0.69;ERLIN1|0.69;CDK1|0.69;ATP1B1|0.69;PNPT1|0.69;USP39|0.69;ETHE1|0.68;CLPX|0.67;ITGB4|0.65;MCCC2|0.64;NCEH1|0.63;PCYOX1|0.61;HSD17B4|0.54;CD44|0.47	28	3446	107	38520	http://www.ebi.ac.uk/QuickGO/GTerm?id=GO:0009056
3	3	cell motility	GO:0048870	3.32×10-2	8.83×10-2	-1.63	-0.61	1.05743	-10.6873	BSG|0.73;ITGA5|0.73;C1QBP|0.7;CSPG4|0.69;CDK1|0.69;ATP1B1|0.69;ITGB4|0.65;SLC7A5|0.63;CD44|0.47	9	1591	107	38520	http://www.ebi.ac.uk/QuickGO/GTerm?id=GO:0048870
3	3	cell proliferation	GO:0008283	3.52×10-2	9.17×10-2	-2.1	-0.91	1.05743	-10.6873	NDRG1|1.88;CDKN2A|1.86;S100A11|1.58;S100A6|1.52;HDAC2|0.73;CYBA|0.7;CSPG4|0.69;DNAJA3|0.69;PHB2|0.67;MYDGF|0.65;ASPH|0.63	11	2136	107	38520	http://www.ebi.ac.uk/QuickGO/GTerm?id=GO:0008283
3	3	cellular component biogenesis	GO:0044085	3.38×10-3	2.23×10-2	-3.48	-1.77	1.05743	-10.6873	CDKN2A|1.86;STMN1|1.67;CLIP1|1.66;DBNL|1.6;ATP6V0D1|0.74;AIFM1|0.74;OAT|0.73;ITGA5|0.73;GLS|0.72;HM13|0.71;KIF2A|0.71;C1QBP|0.7;CYBA|0.7;LSG1|0.7;SMARCA5|0.7;PNPT1|0.69;USP39|0.69;ITGB4|0.65;ACAD9|0.64;BMS1|0.54	20	3761	107	38520	http://www.ebi.ac.uk/QuickGO/GTerm?id=GO:0044085
3	3	cellular component organization	GO:0016043	1.31×10-7	1.60×10-5	-8.75	-5.06	1.05743	-10.6873	NDRG1|1.88;CDKN2A|1.86;STMN1|1.67;CLIP1|1.66;DBNL|1.6;PPP1R12A|1.54;S100A6|1.52;DDOST|0.74;MRPL21|0.74;ATP6V0D1|0.74;AIFM1|0.74;SMARCA4|0.74;OAT|0.73;BSG|0.73;ACP2|0.73;ALCAM|0.73;ITGA5|0.73;HDAC2|0.73;MRPL54|0.72;SERPINH1|0.72;GLS|0.72;TRRAP|0.72;TUFM|0.71;HM13|0.71;KIF2A|0.71;C1QBP|0.7;CYBA|0.7;SMARCA5|0.7;CTSS|0.7;NDUFA13|0.7;NUP210|0.69;CDK1|0.69;ATP1B1|0.69;DNAJA3|0.69;PNPT1|0.69;USP39|0.69;…	50	9076	107	38520	http://www.ebi.ac.uk/QuickGO/GTerm?id=GO:0016043
3	3	cellular localization	GO:0051641	9.65×10-3	4.13×10-2	-3.6	-1.85	1.05743	-10.6873	SRRM1|1.69;CLIP1|1.66;SRI|1.57;PPP1R12A|1.54;DDOST|0.74;BSG|0.73;ATP5L|0.72;GLS|0.72;HM13|0.71;CYBA|0.7;LSG1|0.7;NDUFA13|0.7;CDK1|0.69;ATP1B1|0.69;DNAJA3|0.69;PNPT1|0.69;SEC62|0.68;PHB2|0.67;PARP1|0.66;ASPH|0.63;ERO1L|0.58	21	4423	107	38520	http://www.ebi.ac.uk/QuickGO/GTerm?id=GO:0051641
3	3	cellular metabolic process	GO:0044237	5.87×10-9	1.51×10-6	-14.87	-8.88	1.05743	-10.6873	CDKN2A|1.86;GTF2F1|1.8;PSMA1|1.74;GIGYF2|1.72;SLK|1.69;SRRM1|1.69;DBNL|1.6;S100A11|1.58;PPP1R12A|1.54;UBE2K|1.53;DDOST|0.74;LPCAT1|0.74;SLC25A1|0.74;MRPL21|0.74;TECR|0.74;ATP6V0D1|0.74;AIFM1|0.74;MUT|0.74;PDHA1|0.74;SMARCA4|0.74;OAT|0.73;FKBP10|0.73;BSG|0.73;ACP2|0.73;DLD|0.73;ITGA5|0.73;STT3A|0.73;HDAC2|0.73;GNS|0.73;SLTM|0.73;ECH1|0.72;MRPL54|0.72;NARS2|0.72;ATP5L|0.72;YBX3|0.72;SERPINH1|0.72;D…	86	20607	107	38520	http://www.ebi.ac.uk/QuickGO/GTerm?id=GO:0044237
3	3	cellular response to stimulus	GO:0051716	2.96×10-4	4.43×10-3	-8.99	-5.21	1.05743	-10.6873	NDRG1|1.88;CDKN2A|1.86;PSMA1|1.74;GIGYF2|1.72;SLK|1.69;STMN1|1.67;CLIP1|1.66;TMEM109|1.61;DBNL|1.6;S100A11|1.58;SRI|1.57;PPP1R12A|1.54;UBE2K|1.53;S100A6|1.52;ATP6V0D1|0.74;AIFM1|0.74;SMARCA4|0.74;BSG|0.73;ALCAM|0.73;ITGA5|0.73;HDAC2|0.73;YBX3|0.72;TRRAP|0.72;HM13|0.71;KIF2A|0.71;C1QBP|0.7;CYBA|0.7;SMARCA5|0.7;CTSS|0.7;NDUFA13|0.7;CSPG4|0.69;NUP210|0.69;ERLIN1|0.69;CDK1|0.69;ATP1B1|0.69;DNAJA3|0.6…	49	11418	107	38520	http://www.ebi.ac.uk/QuickGO/GTerm?id=GO:0051716
3	3	circadian rhythm	GO:0007623	1.99×10-2	6.53×10-2	-0.53	0.07	1.05743	-10.6873	HDAC2|0.73;TOP1|0.68;TOP2A|0.6	3	206	107	38520	http://www.ebi.ac.uk/QuickGO/GTerm?id=GO:0007623
3	3	death	GO:0016265	3.59×10-7	2.75×10-5	-4.26	-2.26	1.05743	-10.6873	CDKN2A|1.86;PSMA1|1.74;SLK|1.69;TMEM109|1.61;DBNL|1.6;UBE2K|1.53;AIFM1|0.74;ACP2|0.73;ITGA5|0.73;HDAC2|0.73;SLTM|0.73;YBX3|0.72;C1QBP|0.7;NDUFA13|0.7;CDK1|0.69;DNAJA3|0.69;HYOU1|0.69;TOP1|0.68;PHB2|0.67;MYDGF|0.65;TOP2A|0.6;ERO1L|0.58;CD44|0.47	23	2523	107	38520	http://www.ebi.ac.uk/QuickGO/GTerm?id=GO:0016265
3	3	developmental process involved in reproduction	GO:0003006	2.70×10-3	1.95×10-2	-1.32	-0.42	1.05743	-10.6873	SMARCA4|0.74;BSG|0.73;DLD|0.73;YBX3|0.72;PHB2|0.67;HSD17B4|0.54;CD44|0.47	7	669	107	38520	http://www.ebi.ac.uk/QuickGO/GTerm?id=GO:0003006
3	3	establishment of localization	GO:0051234	4.64×10-2	1.05×10-1	-5.58	-3.08	1.05743	-10.6873	SRRM1|1.69;CLIP1|1.66;DBNL|1.6;SRI|1.57;PPP1R12A|1.54;S100A6|1.52;DDOST|0.74;SFXN3|0.74;SLC25A1|0.74;ATP6V0D1|0.74;BSG|0.73;ATP5L|0.72;GLS|0.72;HM13|0.71;CYBA|0.7;LSG1|0.7;CTSS|0.7;NDUFA13|0.7;NUP210|0.69;ATP1B1|0.69;PNPT1|0.69;HYOU1|0.69;SEC62|0.68;PHB2|0.67;PARP1|0.66;SLC7A5|0.63;ASPH|0.63;SERINC1|0.62;GOLIM4|0.62;SLCO3A1|0.61;PCYOX1|0.61;ERO1L|0.58	32	8676	107	38520	http://www.ebi.ac.uk/QuickGO/GTerm?id=GO:0051234
3	3	feeding behavior	GO:0007631	3.65×10-2	9.31×10-2	-0.09	0.34	1.05743	-10.6873	GIGYF2|1.72;GLS|0.72	2	108	107	38520	http://www.ebi.ac.uk/QuickGO/GTerm?id=GO:0007631
3	3	interspecies interaction between organisms	GO:0044419	6.59×10-5	1.47×10-3	-2.06	-0.88	1.05743	-10.6873	GTF2F1|1.8;PSMA1|1.74;ATP6V0D1|0.74;SMARCA4|0.74;ITGA5|0.73;C1QBP|0.7;CYBA|0.7;NUP210|0.69;TOP1|0.68;TOP2A|0.6;SSRP1|0.5	11	944	107	38520	http://www.ebi.ac.uk/QuickGO/GTerm?id=GO:0044419
3	3	leukocyte migration	GO:0050900	5.95×10-4	7.58×10-3	-1.12	-0.3	1.05743	-10.6873	BSG|0.73;ITGA5|0.73;C1QBP|0.7;ATP1B1|0.69;SLC7A5|0.63;CD44|0.47	6	369	107	38520	http://www.ebi.ac.uk/QuickGO/GTerm?id=GO:0050900
3	3	localization of cell	GO:0051674	3.32×10-2	8.83×10-2	-1.63	-0.61	1.05743	-10.6873	BSG|0.73;ITGA5|0.73;C1QBP|0.7;CSPG4|0.69;CDK1|0.69;ATP1B1|0.69;ITGB4|0.65;SLC7A5|0.63;CD44|0.47	9	1591	107	38520	http://www.ebi.ac.uk/QuickGO/GTerm?id=GO:0051674
3	3	macromolecule localization	GO:0033036	2.68×10-2	7.88×10-2	-3.03	-1.49	1.05743	-10.6873	SRRM1|1.69;CLIP1|1.66;SRI|1.57;DDOST|0.74;ATP6V0D1|0.74;BSG|0.73;HM13|0.71;LSG1|0.7;NDUFA13|0.7;NUP210|0.69;CDK1|0.69;ATP1B1|0.69;DNAJA3|0.69;PNPT1|0.69;SEC62|0.68;PHB2|0.67;PARP1|0.66;ASPH|0.63	18	3996	107	38520	http://www.ebi.ac.uk/QuickGO/GTerm?id=GO:0033036
3	3	multi-organism cellular process	GO:0044764	8.53×10-4	9.99×10-3	-1.77	-0.7	1.05743	-10.6873	GTF2F1|1.8;PSMA1|1.74;SMARCA4|0.74;ITGA5|0.73;C1QBP|0.7;NUP210|0.69;TOP1|0.68;TOP2A|0.6;SSRP1|0.5	9	889	107	38520	http://www.ebi.ac.uk/QuickGO/GTerm?id=GO:0044764
3	3	multi-organism metabolic process	GO:0044033	5.09×10-4	6.55×10-3	-1.07	-0.27	1.05743	-10.6873	GTF2F1|1.8;SMARCA4|0.74;NUP210|0.69;TOP2A|0.6;SSRP1|0.5	5	234	107	38520	http://www.ebi.ac.uk/QuickGO/GTerm?id=GO:0044033
3	3	negative regulation of cellular process	GO:0048523	3.43×10-6	1.58×10-4	-5.93	-3.3	1.05743	-10.6873	NDRG1|1.88;CDKN2A|1.86;PSMA1|1.74;GIGYF2|1.72;STMN1|1.67;TMEM109|1.61;S100A11|1.58;SRI|1.57;LPCAT1|0.74;SMARCA4|0.74;ITGA5|0.73;HDAC2|0.73;YBX3|0.72;SERPINH1|0.72;TRRAP|0.72;C1QBP|0.7;CYBA|0.7;SMARCA5|0.7;NDUFA13|0.7;ERLIN1|0.69;CDK1|0.69;DNAJA3|0.69;PNPT1|0.69;HYOU1|0.69;AURKAIP1|0.68;PHB2|0.67;PARP1|0.66;MYDGF|0.65;ASPH|0.63;TOP2A|0.6;ERO1L|0.58;CD44|0.47	32	5003	107	38520	http://www.ebi.ac.uk/QuickGO/GTerm?id=GO:0048523
3	3	negative regulation of growth	GO:0045926	3.60×10-3	2.34×10-2	-0.72	-0.05	1.05743	-10.6873	CDKN2A|1.86;SMARCA4|0.74;NDUFA13|0.7;PNPT1|0.69	4	224	107	38520	http://www.ebi.ac.uk/QuickGO/GTerm?id=GO:0045926
3	3	negative regulation of metabolic process	GO:0009892	2.27×10-3	1.78×10-2	-3.28	-1.65	1.05743	-10.6873	CDKN2A|1.86;PSMA1|1.74;GIGYF2|1.72;S100A11|1.58;PPP1R12A|1.54;LPCAT1|0.74;SMARCA4|0.74;HDAC2|0.73;YBX3|0.72;SERPINH1|0.72;C1QBP|0.7;SMARCA5|0.7;NDUFA13|0.7;ERLIN1|0.69;DNAJA3|0.69;PHB2|0.67;PARP1|0.66;CD44|0.47	18	3113	107	38520	http://www.ebi.ac.uk/QuickGO/GTerm?id=GO:0009892
3	3	negative regulation of response to stimulus	GO:0048585	2.57×10-2	7.65×10-2	-1.65	-0.63	1.05743	-10.6873	PSMA1|1.74;SMARCA4|0.74;YBX3|0.72;C1QBP|0.7;NDUFA13|0.7;DNAJA3|0.69;HYOU1|0.69;PHB2|0.67;CD44|0.47	9	1519	107	38520	http://www.ebi.ac.uk/QuickGO/GTerm?id=GO:0048585
3	3	nitrogen compound metabolic process	GO:0006807	2.09×10-6	1.07×10-4	-10.63	-6.24	1.05743	-10.6873	CDKN2A|1.86;GTF2F1|1.8;PSMA1|1.74;GIGYF2|1.72;SRRM1|1.69;S100A11|1.58;PPP1R12A|1.54;DDOST|0.74;LPCAT1|0.74;MRPL21|0.74;AIFM1|0.74;MUT|0.74;PDHA1|0.74;SMARCA4|0.74;OAT|0.73;DLD|0.73;HDAC2|0.73;GNS|0.73;SLTM|0.73;MRPL54|0.72;NARS2|0.72;ATP5L|0.72;YBX3|0.72;DHX30|0.72;GLS|0.72;TRRAP|0.72;TUFM|0.71;NDUFA10|0.71;C1QBP|0.7;SMARCA5|0.7;NDUFA13|0.7;CARS2|0.7;CSPG4|0.69;NUP210|0.69;ERLIN1|0.69;CDK1|0.69;D…	60	13062	107	38520	http://www.ebi.ac.uk/QuickGO/GTerm?id=GO:0006807
3	3	organic substance metabolic process	GO:0071704	2.87×10-7	2.46×10-5	-14.94	-8.92	1.05743	-10.6873	CDKN2A|1.86;GTF2F1|1.8;PSMA1|1.74;GIGYF2|1.72;SLK|1.69;SRRM1|1.69;DBNL|1.6;S100A11|1.58;SRI|1.57;PPP1R12A|1.54;UBE2K|1.53;DDOST|0.74;LPCAT1|0.74;SLC25A1|0.74;MRPL21|0.74;TECR|0.74;ATP6V0D1|0.74;AIFM1|0.74;MUT|0.74;PDHA1|0.74;SMARCA4|0.74;OAT|0.73;FKBP10|0.73;BSG|0.73;DLD|0.73;ITGA5|0.73;STT3A|0.73;HDAC2|0.73;GNS|0.73;SLTM|0.73;ECH1|0.72;MRPL54|0.72;NARS2|0.72;ATP5L|0.72;YBX3|0.72;SERPINH1|0.72;DH…	86	21962	107	38520	http://www.ebi.ac.uk/QuickGO/GTerm?id=GO:0071704
3	3	positive regulation of cellular process	GO:0048522	1.49×10-6	8.51×10-5	-6.68	-3.77	1.05743	-10.6873	NDRG1|1.88;CDKN2A|1.86;GTF2F1|1.8;PSMA1|1.74;SLK|1.69;STMN1|1.67;CLIP1|1.66;DBNL|1.6;SRI|1.57;PPP1R12A|1.54;S100A6|1.52;AIFM1|0.74;SMARCA4|0.74;ITGA5|0.73;HDAC2|0.73;YBX3|0.72;C1QBP|0.7;CYBA|0.7;CTSS|0.7;NDUFA13|0.7;CSPG4|0.69;ERLIN1|0.69;CDK1|0.69;ATP1B1|0.69;DNAJA3|0.69;PNPT1|0.69;AURKAIP1|0.68;PHB2|0.67;CLPX|0.67;PARP1|0.66;MYDGF|0.65;ASPH|0.63;TOP2A|0.6;SSRP1|0.5;CD44|0.47	35	5573	107	38520	http://www.ebi.ac.uk/QuickGO/GTerm?id=GO:0048522
3	3	positive regulation of immune system process	GO:0002684	4.31×10-2	1.01×10-1	-1.2	-0.35	1.05743	-10.6873	PSMA1|1.74;C1QBP|0.7;CYBA|0.7;CTSS|0.7;CDK1|0.69;DNAJA3|0.69;PHB2|0.67	7	1160	107	38520	http://www.ebi.ac.uk/QuickGO/GTerm?id=GO:0002684
3	3	positive regulation of metabolic process	GO:0009893	6.71×10-6	2.62×10-4	-5.5	-3.03	1.05743	-10.6873	GTF2F1|1.8;PSMA1|1.74;SLK|1.69;DBNL|1.6;PPP1R12A|1.54;LPCAT1|0.74;AIFM1|0.74;SMARCA4|0.74;ITGA5|0.73;HDAC2|0.73;YBX3|0.72;C1QBP|0.7;CYBA|0.7;NDUFA13|0.7;CSPG4|0.69;ERLIN1|0.69;CDK1|0.69;ATP1B1|0.69;DNAJA3|0.69;PNPT1|0.69;AURKAIP1|0.68;PHB2|0.67;CLPX|0.67;PARP1|0.66;MYDGF|0.65;ASPH|0.63;SERINC1|0.62;TOP2A|0.6;SSRP1|0.5;CD44|0.47	30	4656	107	38520	http://www.ebi.ac.uk/QuickGO/GTerm?id=GO:0009893
3	3	positive regulation of multi-organism process	GO:0043902	4.62×10-6	1.98×10-4	-1.22	-0.36	1.05743	-10.6873	GTF2F1|1.8;SMARCA4|0.74;C1QBP|0.7;CYBA|0.7;TOP2A|0.6;SSRP1|0.5	6	153	107	38520	http://www.ebi.ac.uk/QuickGO/GTerm?id=GO:0043902
3	3	positive regulation of response to stimulus	GO:0048584	3.82×10-4	5.43×10-3	-3.13	-1.55	1.05743	-10.6873	CDKN2A|1.86;PSMA1|1.74;DBNL|1.6;SRI|1.57;SMARCA4|0.74;ITGA5|0.73;HDAC2|0.73;C1QBP|0.7;CYBA|0.7;CTSS|0.7;CSPG4|0.69;CDK1|0.69;ATP1B1|0.69;PHB2|0.67;PARP1|0.66;MYDGF|0.65;CD44|0.47	17	2431	107	38520	http://www.ebi.ac.uk/QuickGO/GTerm?id=GO:0048584
3	3	positive regulation of signaling	GO:0023056	2.45×10-4	3.93×10-3	-2.55	-1.19	1.05743	-10.6873	PSMA1|1.74;DBNL|1.6;SRI|1.57;SMARCA4|0.74;ITGA5|0.73;HDAC2|0.73;C1QBP|0.7;CYBA|0.7;CSPG4|0.69;CDK1|0.69;PHB2|0.67;PARP1|0.66;MYDGF|0.65;CD44|0.47	14	1688	107	38520	http://www.ebi.ac.uk/QuickGO/GTerm?id=GO:0023056
3	3	positive regulation of transport	GO:0051050	3.84×10-2	9.51×10-2	-1.05	-0.25	1.05743	-10.6873	SRI|1.57;CYBA|0.7;CTSS|0.7;ATP1B1|0.69;PARP1|0.66;ASPH|0.63	6	892	107	38520	http://www.ebi.ac.uk/QuickGO/GTerm?id=GO:0051050
3	3	primary metabolic process	GO:0044238	1.31×10-6	7.64×10-5	-14.39	-8.58	1.05743	-10.6873	CDKN2A|1.86;GTF2F1|1.8;PSMA1|1.74;GIGYF2|1.72;SLK|1.69;SRRM1|1.69;DBNL|1.6;S100A11|1.58;SRI|1.57;PPP1R12A|1.54;UBE2K|1.53;DDOST|0.74;LPCAT1|0.74;SLC25A1|0.74;MRPL21|0.74;TECR|0.74;ATP6V0D1|0.74;AIFM1|0.74;MUT|0.74;PDHA1|0.74;SMARCA4|0.74;OAT|0.73;FKBP10|0.73;DLD|0.73;ITGA5|0.73;STT3A|0.73;HDAC2|0.73;GNS|0.73;SLTM|0.73;ECH1|0.72;MRPL54|0.72;NARS2|0.72;ATP5L|0.72;YBX3|0.72;SERPINH1|0.72;DHX30|0.72;…	83	21295	107	38520	http://www.ebi.ac.uk/QuickGO/GTerm?id=GO:0044238
3	3	regulation of biological quality	GO:0065008	2.20×10-4	3.65×10-3	-4.48	-2.4	1.05743	-10.6873	GIGYF2|1.72;SRI|1.57;SFXN3|0.74;LPCAT1|0.74;ATP6V0D1|0.74;AIFM1|0.74;SMARCA4|0.74;BSG|0.73;DLD|0.73;ITGA5|0.73;HDAC2|0.73;YBX3|0.72;GLS|0.72;KIF2A|0.71;C1QBP|0.7;CYBA|0.7;ATP1B1|0.69;DNAJA3|0.69;PHB2|0.67;PARP1|0.66;LARS2|0.64;SLC7A5|0.63;ASPH|0.63;ERO1L|0.58;HSD17B4|0.54;CD44|0.47	26	4523	107	38520	http://www.ebi.ac.uk/QuickGO/GTerm?id=GO:0065008
3	3	regulation of growth	GO:0040008	2.42×10-3	1.85×10-2	-1.19	-0.34	1.05743	-10.6873	CDKN2A|1.86;SMARCA4|0.74;YBX3|0.72;CYBA|0.7;NDUFA13|0.7;PNPT1|0.69;PARP1|0.66	7	656	107	38520	http://www.ebi.ac.uk/QuickGO/GTerm?id=GO:0040008
3	3	regulation of molecular function	GO:0065009	6.60×10-4	8.12×10-3	-4.34	-2.31	1.05743	-10.6873	CDKN2A|1.86;GTF2F1|1.8;PSMA1|1.74;SLK|1.69;DBNL|1.6;SRI|1.57;PPP1R12A|1.54;AIFM1|0.74;SMARCA4|0.74;HDAC2|0.73;SERPINH1|0.72;CTSS|0.7;NDUFA13|0.7;CSPG4|0.69;CDK1|0.69;ATP1B1|0.69;DNAJA3|0.69;PHB2|0.67;CLPX|0.67;PARP1|0.66;ASPH|0.63;SERINC1|0.62;CD44|0.47	23	4052	107	38520	http://www.ebi.ac.uk/QuickGO/GTerm?id=GO:0065009
3	3	regulation of response to stimulus	GO:0048583	1.46×10-3	1.38×10-2	-4.27	-2.27	1.05743	-10.6873	CDKN2A|1.86;PSMA1|1.74;DBNL|1.6;SRI|1.57;SMARCA4|0.74;ITGA5|0.73;HDAC2|0.73;YBX3|0.72;C1QBP|0.7;CYBA|0.7;CTSS|0.7;NDUFA13|0.7;CSPG4|0.69;NUP210|0.69;CDK1|0.69;ATP1B1|0.69;DNAJA3|0.69;PNPT1|0.69;HYOU1|0.69;PHB2|0.67;PARP1|0.66;MYDGF|0.65;ASPH|0.63;CD44|0.47	24	4568	107	38520	http://www.ebi.ac.uk/QuickGO/GTerm?id=GO:0048583
3	3	regulation of signaling	GO:0023051	5.07×10-3	2.94×10-2	-3.37	-1.7	1.05743	-10.6873	PSMA1|1.74;DBNL|1.6;SRI|1.57;SMARCA4|0.74;ITGA5|0.73;HDAC2|0.73;YBX3|0.72;C1QBP|0.7;CYBA|0.7;NDUFA13|0.7;CSPG4|0.69;CDK1|0.69;DNAJA3|0.69;HYOU1|0.69;PHB2|0.67;PARP1|0.66;MYDGF|0.65;ASPH|0.63;CD44|0.47	19	3627	107	38520	http://www.ebi.ac.uk/QuickGO/GTerm?id=GO:0023051
3	3	response to abiotic stimulus	GO:0009628	8.21×10-4	9.78×10-3	-1.95	-0.82	1.05743	-10.6873	NDRG1|1.88;TMEM109|1.61;HDAC2|0.73;YBX3|0.72;CYBA|0.7;CTSS|0.7;NUP210|0.69;ATP1B1|0.69;DNAJA3|0.69;HYOU1|0.69;ERO1L|0.58	11	1269	107	38520	http://www.ebi.ac.uk/QuickGO/GTerm?id=GO:0009628
3	3	response to chemical	GO:0042221	1.09×10-5	3.65×10-4	-5.23	-2.86	1.05743	-10.6873	NDRG1|1.88;SRI|1.57;DDOST|0.74;ATP6V0D1|0.74;BSG|0.73;ACP2|0.73;ALCAM|0.73;ITGA5|0.73;HDAC2|0.73;YBX3|0.72;SERPINH1|0.72;HM13|0.71;NDUFA10|0.71;C1QBP|0.7;CYBA|0.7;CTSS|0.7;NDUFA13|0.7;NUP210|0.69;ERLIN1|0.69;CDK1|0.69;DNAJA3|0.69;PNPT1|0.69;HYOU1|0.69;TOP1|0.68;SEC62|0.68;FUS|0.67;PARP1|0.66;MYDGF|0.65;ASPH|0.63;ERO1L|0.58;CD44|0.47	31	5027	107	38520	http://www.ebi.ac.uk/QuickGO/GTerm?id=GO:0042221
3	3	response to stress	GO:0006950	4.58×10-9	1.51×10-6	-7.3	-4.16	1.05743	-10.6873	NDRG1|1.88;CDKN2A|1.86;PSMA1|1.74;GIGYF2|1.72;SLK|1.69;TMEM109|1.61;DBNL|1.6;UBE2K|1.53;DDOST|0.74;ATP6V0D1|0.74;AIFM1|0.74;BSG|0.73;ITGA5|0.73;HDAC2|0.73;YBX3|0.72;SERPINH1|0.72;TRRAP|0.72;HM13|0.71;KIF2A|0.71;C1QBP|0.7;CYBA|0.7;SMARCA5|0.7;CTSS|0.7;NUP210|0.69;ERLIN1|0.69;CDK1|0.69;ATP1B1|0.69;DNAJA3|0.69;PNPT1|0.69;HYOU1|0.69;SEC62|0.68;PHB2|0.67;PARP1|0.66;MYDGF|0.65;ITGB4|0.65;SLC7A5|0.63;TO…	40	5602	107	38520	http://www.ebi.ac.uk/QuickGO/GTerm?id=GO:0006950
3	3	single organism reproductive process	GO:0044702	4.95×10-3	2.90×10-2	-1.63	-0.62	1.05743	-10.6873	SMARCA4|0.74;BSG|0.73;DLD|0.73;YBX3|0.72;C1QBP|0.7;CDK1|0.69;PHB2|0.67;HSD17B4|0.54;CD44|0.47	9	1155	107	38520	http://www.ebi.ac.uk/QuickGO/GTerm?id=GO:0044702
3	3	single organism signaling	GO:0044700	8.89×10-4	1.02×10-2	-7.83	-4.49	1.05743	-10.6873	NDRG1|1.88;CDKN2A|1.86;PSMA1|1.74;GIGYF2|1.72;SLK|1.69;STMN1|1.67;CLIP1|1.66;TMEM109|1.61;DBNL|1.6;S100A11|1.58;SRI|1.57;PPP1R12A|1.54;UBE2K|1.53;S100A6|1.52;ATP6V0D1|0.74;AIFM1|0.74;SMARCA4|0.74;BSG|0.73;ALCAM|0.73;ITGA5|0.73;HDAC2|0.73;YBX3|0.72;GLS|0.72;KIF2A|0.71;C1QBP|0.7;CYBA|0.7;CTSS|0.7;NDUFA13|0.7;CSPG4|0.69;NUP210|0.69;ERLIN1|0.69;CDK1|0.69;ATP1B1|0.69;DNAJA3|0.69;HYOU1|0.69;SEC62|0.68;…	43	9995	107	38520	http://www.ebi.ac.uk/QuickGO/GTerm?id=GO:0044700
3	3	single-multicellular organism process	GO:0044707	1.00×10-4	2.07×10-3	-6.73	-3.8	1.05743	-10.6873	NDRG1|1.88;GIGYF2|1.72;STMN1|1.67;DBNL|1.6;SRI|1.57;S100A6|1.52;LPCAT1|0.74;ATP6V0D1|0.74;AIFM1|0.74;MUT|0.74;SMARCA4|0.74;OAT|0.73;BSG|0.73;ACP2|0.73;DLD|0.73;ALCAM|0.73;ITGA5|0.73;HDAC2|0.73;YBX3|0.72;SERPINH1|0.72;GLS|0.72;KIF2A|0.71;C1QBP|0.7;CYBA|0.7;CTSS|0.7;CSPG4|0.69;CDK1|0.69;ATP1B1|0.69;DNAJA3|0.69;TOP1|0.68;PHB2|0.67;PARP1|0.66;MYDGF|0.65;ITGB4|0.65;SLC7A5|0.63;ASPH|0.63;TOP2A|0.6;HSD1…	39	7897	107	38520	http://www.ebi.ac.uk/QuickGO/GTerm?id=GO:0044707
3	3	single-organism behavior	GO:0044708	2.95×10-2	8.34×10-2	-0.69	-0.03	1.05743	-10.6873	GIGYF2|1.72;ITGA5|0.73;HDAC2|0.73;PARP1|0.66	4	418	107	38520	http://www.ebi.ac.uk/QuickGO/GTerm?id=GO:0044708
3	3	single-organism cellular process	GO:0044763	5.47×10-9	1.51×10-6	-15.75	-9.43	1.05743	-10.6873	NDRG1|1.88;CDKN2A|1.86;PSMA1|1.74;GIGYF2|1.72;SLK|1.69;STMN1|1.67;CLIP1|1.66;TMEM109|1.61;DBNL|1.6;S100A11|1.58;SRI|1.57;PPP1R12A|1.54;UBE2K|1.53;S100A6|1.52;TAGLN2|1.51;DDOST|0.74;SFXN3|0.74;LPCAT1|0.74;SLC25A1|0.74;MRPL21|0.74;TECR|0.74;ATP6V0D1|0.74;AIFM1|0.74;MUT|0.74;PDHA1|0.74;SMARCA4|0.74;OAT|0.73;BSG|0.73;ACP2|0.73;DLD|0.73;ALCAM|0.73;ITGA5|0.73;STT3A|0.73;HDAC2|0.73;GNS|0.73;SLTM|0.73;EC…	91	22761	107	38520	http://www.ebi.ac.uk/QuickGO/GTerm?id=GO:0044763
3	3	single-organism developmental process	GO:0044767	3.40×10-6	1.58×10-4	-7.24	-4.12	1.05743	-10.6873	NDRG1|1.88;CDKN2A|1.86;GIGYF2|1.72;STMN1|1.67;DBNL|1.6;SRI|1.57;S100A6|1.52;TAGLN2|1.51;LPCAT1|0.74;ATP6V0D1|0.74;AIFM1|0.74;MUT|0.74;SMARCA4|0.74;BSG|0.73;ACP2|0.73;DLD|0.73;ALCAM|0.73;ITGA5|0.73;HDAC2|0.73;YBX3|0.72;SERPINH1|0.72;KIF2A|0.71;C1QBP|0.7;CSPG4|0.69;CDK1|0.69;DNAJA3|0.69;PNPT1|0.69;TOP1|0.68;POLDIP2|0.68;PHB2|0.67;PARP1|0.66;MYDGF|0.65;ITGB4|0.65;SLC7A5|0.63;ASPH|0.63;TOP2A|0.6;ERO1…	40	7127	107	38520	http://www.ebi.ac.uk/QuickGO/GTerm?id=GO:0044767
3	3	single-organism localization	GO:1902578	2.93×10-2	8.34×10-2	-4.83	-2.61	1.05743	-10.6873	SRRM1|1.69;CLIP1|1.66;SRI|1.57;S100A6|1.52;DDOST|0.74;SFXN3|0.74;SLC25A1|0.74;ATP6V0D1|0.74;BSG|0.73;ATP5L|0.72;GLS|0.72;HM13|0.71;CYBA|0.7;CTSS|0.7;NDUFA13|0.7;NUP210|0.69;ATP1B1|0.69;DNAJA3|0.69;PNPT1|0.69;SEC62|0.68;PHB2|0.67;PARP1|0.66;SLC7A5|0.63;ASPH|0.63;SERINC1|0.62;SLCO3A1|0.61;PCYOX1|0.61;ERO1L|0.58	28	7088	107	38520	http://www.ebi.ac.uk/QuickGO/GTerm?id=GO:1902578
3	3	single-organism metabolic process	GO:0044710	5.50×10-16	1.42×10-12	-11.29	-6.65	1.05743	-10.6873	PSMA1|1.74;SLK|1.69;DBNL|1.6;DDOST|0.74;LPCAT1|0.74;SLC25A1|0.74;MRPL21|0.74;TECR|0.74;AIFM1|0.74;MUT|0.74;PDHA1|0.74;OAT|0.73;BSG|0.73;DLD|0.73;STT3A|0.73;HDAC2|0.73;GNS|0.73;ECH1|0.72;MRPL54|0.72;NARS2|0.72;ATP5L|0.72;SERPINH1|0.72;GLS|0.72;TRRAP|0.72;TUFM|0.71;MLEC|0.71;HM13|0.71;PTPMT1|0.71;NDUFA10|0.71;C1QBP|0.7;CYBA|0.7;SMARCA5|0.7;CTSS|0.7;NDUFA13|0.7;CARS2|0.7;CSPG4|0.69;NUP210|0.69;ERLIN…	66	9513	107	38520	http://www.ebi.ac.uk/QuickGO/GTerm?id=GO:0044710
4	4	adult behavior	GO:0030534	9.35×10-3	4.06×10-2	-0.24	0.26	1.05743	-10.6873	GIGYF2|1.72;HDAC2|0.73;PARP1|0.66	3	155	107	38520	http://www.ebi.ac.uk/QuickGO/GTerm?id=GO:0030534
4	4	aging	GO:0007568	7.38×10-3	3.62×10-2	-0.73	-0.05	1.05743	-10.6873	CDKN2A|1.86;DLD|0.73;DNAJA3|0.69;PNPT1|0.69	4	275	107	38520	http://www.ebi.ac.uk/QuickGO/GTerm?id=GO:0007568
4	4	antigen processing and presentation of exogenous antigen	GO:0019884	6.00×10-3	3.16×10-2	-0.7	-0.03	1.05743	-10.6873	PSMA1|1.74;KIF2A|0.71;CYBA|0.7;CTSS|0.7	4	259	107	38520	http://www.ebi.ac.uk/QuickGO/GTerm?id=GO:0019884
4	4	antigen processing and presentation of peptide antigen	GO:0048002	8.65×10-3	3.86×10-2	-0.7	-0.03	1.05743	-10.6873	PSMA1|1.74;KIF2A|0.71;CYBA|0.7;CTSS|0.7	4	288	107	38520	http://www.ebi.ac.uk/QuickGO/GTerm?id=GO:0048002
4	4	appendage development	GO:0048736	1.26×10-2	4.90×10-2	-0.52	0.07	1.05743	-10.6873	HDAC2|0.73;ITGB4|0.65;ASPH|0.63	3	173	107	38520	http://www.ebi.ac.uk/QuickGO/GTerm?id=GO:0048736
4	4	carbohydrate derivative metabolic process	GO:1901135	1.04×10-3	1.10×10-2	-2.38	-1.08	1.05743	-10.6873	DDOST|0.74;PDHA1|0.74;DLD|0.73;STT3A|0.73;GNS|0.73;ATP5L|0.72;MLEC|0.71;NDUFA10|0.71;CSPG4|0.69;PARP1|0.66;GANAB|0.64;MCCC2|0.64;SERINC1|0.62;CD44|0.47	14	1954	107	38520	http://www.ebi.ac.uk/QuickGO/GTerm?id=GO:1901135
4	4	carbohydrate metabolic process	GO:0005975	3.12×10-5	8.53×10-4	-2.5	-1.16	1.05743	-10.6873	DDOST|0.74;SLC25A1|0.74;PDHA1|0.74;STT3A|0.73;GNS|0.73;MLEC|0.71;PTPMT1|0.71;CSPG4|0.69;NUP210|0.69;MDH2|0.68;CS|0.68;PDHB|0.67;PARP1|0.66;GANAB|0.64;CD44|0.47	15	1577	107	38520	http://www.ebi.ac.uk/QuickGO/GTerm?id=GO:0005975
4	4	cell aging	GO:0007569	2.54×10-3	1.93×10-2	-0.27	0.23	1.05743	-10.6873	CDKN2A|1.86;DNAJA3|0.69;PNPT1|0.69	3	97	107	38520	http://www.ebi.ac.uk/QuickGO/GTerm?id=GO:0007569
4	4	cell communication	GO:0007154	1.94×10-3	1.61×10-2	-7.83	-4.49	1.05743	-10.6873	NDRG1|1.88;CDKN2A|1.86;PSMA1|1.74;GIGYF2|1.72;SLK|1.69;STMN1|1.67;CLIP1|1.66;TMEM109|1.61;DBNL|1.6;S100A11|1.58;SRI|1.57;PPP1R12A|1.54;UBE2K|1.53;S100A6|1.52;ATP6V0D1|0.74;AIFM1|0.74;SMARCA4|0.74;BSG|0.73;ALCAM|0.73;ITGA5|0.73;HDAC2|0.73;YBX3|0.72;GLS|0.72;KIF2A|0.71;C1QBP|0.7;CYBA|0.7;CTSS|0.7;NDUFA13|0.7;CSPG4|0.69;NUP210|0.69;ERLIN1|0.69;CDK1|0.69;ATP1B1|0.69;DNAJA3|0.69;HYOU1|0.69;SEC62|0.68;…	43	10366	107	38520	http://www.ebi.ac.uk/QuickGO/GTerm?id=GO:0007154
4	4	cell cycle	GO:0007049	4.82×10-5	1.18×10-3	-3.64	-1.87	1.05743	-10.6873	NDRG1|1.88;CDKN2A|1.86;PSMA1|1.74;GIGYF2|1.72;SLK|1.69;STMN1|1.67;CLIP1|1.66;PPP1R12A|1.54;SMARCA4|0.74;HDAC2|0.73;TRRAP|0.72;KIF2A|0.71;NUP210|0.69;CDK1|0.69;PNPT1|0.69;USP39|0.69;AURKAIP1|0.68;PHB2|0.67;TOP2A|0.6	19	2474	107	38520	http://www.ebi.ac.uk/QuickGO/GTerm?id=GO:0007049
4	4	cell cycle process	GO:0022402	2.56×10-5	7.32×10-4	-3.12	-1.55	1.05743	-10.6873	NDRG1|1.88;CDKN2A|1.86;PSMA1|1.74;GIGYF2|1.72;STMN1|1.67;CLIP1|1.66;PPP1R12A|1.54;SMARCA4|0.74;TRRAP|0.72;KIF2A|0.71;NUP210|0.69;CDK1|0.69;PNPT1|0.69;AURKAIP1|0.68;PHB2|0.67;TOP2A|0.6	16	1744	107	38520	http://www.ebi.ac.uk/QuickGO/GTerm?id=GO:0022402
4	4	cell death	GO:0008219	3.49×10-7	2.75×10-5	-4.26	-2.26	1.05743	-10.6873	CDKN2A|1.86;PSMA1|1.74;SLK|1.69;TMEM109|1.61;DBNL|1.6;UBE2K|1.53;AIFM1|0.74;ACP2|0.73;ITGA5|0.73;HDAC2|0.73;SLTM|0.73;YBX3|0.72;C1QBP|0.7;NDUFA13|0.7;CDK1|0.69;DNAJA3|0.69;HYOU1|0.69;TOP1|0.68;PHB2|0.67;MYDGF|0.65;TOP2A|0.6;ERO1L|0.58;CD44|0.47	23	2519	107	38520	http://www.ebi.ac.uk/QuickGO/GTerm?id=GO:0008219
4	4	cell division	GO:0051301	6.14×10-3	3.19×10-2	-1.2	-0.35	1.05743	-10.6873	KIF2A|0.71;CDK1|0.69;USP39|0.69;TOP1|0.68;AURKAIP1|0.68;PHB2|0.67;TOP2A|0.6	7	779	107	38520	http://www.ebi.ac.uk/QuickGO/GTerm?id=GO:0051301
4	3,4	cell growth	GO:0016049	4.92×10-2	1.09×10-1	-0.71	-0.04	1.05743	-10.6873	CDKN2A|1.86;SMARCA4|0.74;CYBA|0.7;NDUFA13|0.7	4	494	107	38520	http://www.ebi.ac.uk/QuickGO/GTerm?id=GO:0016049
4	4	cell projection organization	GO:0030030	4.23×10-2	1.01×10-1	-1.5	-0.53	1.05743	-10.6873	STMN1|1.67;DBNL|1.6;S100A6|1.52;ATP6V0D1|0.74;ALCAM|0.73;ITGA5|0.73;HDAC2|0.73;CDK1|0.69;ITGB4|0.65	9	1665	107	38520	http://www.ebi.ac.uk/QuickGO/GTerm?id=GO:0030030
4	4	cell-substrate adhesion	GO:0031589	3.12×10-3	2.12×10-2	-1.08	-0.27	1.05743	-10.6873	CDKN2A|1.86;ITGA5|0.73;C1QBP|0.7;ITGB4|0.65;CD44|0.47	5	353	107	38520	http://www.ebi.ac.uk/QuickGO/GTerm?id=GO:0031589
4	4	cellular amino acid metabolic process	GO:0006520	2.29×10-8	4.53×10-6	-2.5	-1.16	1.05743	-10.6873	PSMA1|1.74;MUT|0.74;OAT|0.73;DLD|0.73;NARS2|0.72;GLS|0.72;CARS2|0.7;ETHE1|0.68;MCCC2|0.64;LARS2|0.64;SLC7A5|0.63;SERINC1|0.62;PCYOX1|0.61;ERO1L|0.58	14	750	107	38520	http://www.ebi.ac.uk/QuickGO/GTerm?id=GO:0006520
4	4	cellular aromatic compound metabolic process	GO:0006725	1.69×10-2	5.86×10-2	-7.26	-4.13	1.05743	-10.6873	CDKN2A|1.86;GTF2F1|1.8;SRRM1|1.69;S100A11|1.58;PPP1R12A|1.54;AIFM1|0.74;MUT|0.74;PDHA1|0.74;SMARCA4|0.74;DLD|0.73;HDAC2|0.73;SLTM|0.73;NARS2|0.72;ATP5L|0.72;YBX3|0.72;DHX30|0.72;GLS|0.72;TRRAP|0.72;NDUFA10|0.71;C1QBP|0.7;SMARCA5|0.7;NDUFA13|0.7;CARS2|0.7;NUP210|0.69;ERLIN1|0.69;CDK1|0.69;DNAJA3|0.69;PNPT1|0.69;HNRNPR|0.69;USP39|0.69;TOP1|0.68;MDH2|0.68;PHB2|0.67;FUS|0.67;PARP1|0.66;MYDGF|0.65;MCC…	42	11273	107	38520	http://www.ebi.ac.uk/QuickGO/GTerm?id=GO:0006725
4	4	cellular biosynthetic process	GO:0044249	2.69×10-6	1.33×10-4	-9.09	-5.27	1.05743	-10.6873	CDKN2A|1.86;GTF2F1|1.8;GIGYF2|1.72;SRRM1|1.69;S100A11|1.58;PPP1R12A|1.54;DDOST|0.74;LPCAT1|0.74;SLC25A1|0.74;MRPL21|0.74;TECR|0.74;PDHA1|0.74;SMARCA4|0.74;OAT|0.73;DLD|0.73;STT3A|0.73;HDAC2|0.73;SLTM|0.73;MRPL54|0.72;NARS2|0.72;ATP5L|0.72;YBX3|0.72;GLS|0.72;TRRAP|0.72;TUFM|0.71;MLEC|0.71;PTPMT1|0.71;NDUFA10|0.71;C1QBP|0.7;CYBA|0.7;SMARCA5|0.7;NDUFA13|0.7;CARS2|0.7;CSPG4|0.69;NUP210|0.69;ERLIN1|0.…	53	10897	107	38520	http://www.ebi.ac.uk/QuickGO/GTerm?id=GO:0044249
4	4	cellular catabolic process	GO:0044248	3.98×10-5	1.02×10-3	-3.57	-1.83	1.05743	-10.6873	PSMA1|1.74;UBE2K|1.53;AIFM1|0.74;MUT|0.74;DLD|0.73;GNS|0.73;ECH1|0.72;GLS|0.72;CTSS|0.7;CSPG4|0.69;ERLIN1|0.69;CDK1|0.69;ATP1B1|0.69;PNPT1|0.69;USP39|0.69;ETHE1|0.68;CLPX|0.67;ITGB4|0.65;MCCC2|0.64;PCYOX1|0.61;HSD17B4|0.54	21	2885	107	38520	http://www.ebi.ac.uk/QuickGO/GTerm?id=GO:0044248
4	4	cellular component assembly	GO:0022607	2.59×10-3	1.95×10-2	-3.33	-1.68	1.05743	-10.6873	CDKN2A|1.86;STMN1|1.67;CLIP1|1.66;DBNL|1.6;ATP6V0D1|0.74;AIFM1|0.74;OAT|0.73;ITGA5|0.73;GLS|0.72;HM13|0.71;KIF2A|0.71;C1QBP|0.7;CYBA|0.7;SMARCA5|0.7;PNPT1|0.69;USP39|0.69;ITGB4|0.65;ACAD9|0.64;BMS1|0.54	19	3411	107	38520	http://www.ebi.ac.uk/QuickGO/GTerm?id=GO:0022607
4	4	cellular component disassembly	GO:0022411	7.39×10-9	1.73×10-6	-2.8	-1.35	1.05743	-10.6873	STMN1|1.67;DBNL|1.6;MRPL21|0.74;AIFM1|0.74;SMARCA4|0.74;BSG|0.73;MRPL54|0.72;KIF2A|0.71;CTSS|0.7;NUP210|0.69;CDK1|0.69;ATP1B1|0.69;AURKAIP1|0.68;ASPH|0.63;TOP2A|0.6;CD44|0.47	16	938	107	38520	http://www.ebi.ac.uk/QuickGO/GTerm?id=GO:0022411
4	4	cellular developmental process	GO:0048869	1.62×10-4	2.93×10-3	-5.04	-2.75	1.05743	-10.6873	NDRG1|1.88;GIGYF2|1.72;STMN1|1.67;DBNL|1.6;S100A6|1.52;TAGLN2|1.51;ATP6V0D1|0.74;AIFM1|0.74;SMARCA4|0.74;DLD|0.73;ALCAM|0.73;ITGA5|0.73;HDAC2|0.73;SERPINH1|0.72;KIF2A|0.71;C1QBP|0.7;CSPG4|0.69;CDK1|0.69;DNAJA3|0.69;PNPT1|0.69;POLDIP2|0.68;PARP1|0.66;ITGB4|0.65;SLC7A5|0.63;TOP2A|0.6;ERO1L|0.58;GSTK1|0.56;HSD17B4|0.54	28	4963	107	38520	http://www.ebi.ac.uk/QuickGO/GTerm?id=GO:0048869
4	4	cellular ketone metabolic process	GO:0042180	1.68×10-3	1.51×10-2	-0.84	-0.12	1.05743	-10.6873	PSMA1|1.74;PDHA1|0.74;DLD|0.73;ERLIN1|0.69;PDHB|0.67	5	306	107	38520	http://www.ebi.ac.uk/QuickGO/GTerm?id=GO:0042180
4	4	cellular lipid metabolic process	GO:0044255	4.69×10-4	6.22×10-3	-1.89	-0.78	1.05743	-10.6873	LPCAT1|0.74;SLC25A1|0.74;TECR|0.74;MUT|0.74;PDHA1|0.74;DLD|0.73;ECH1|0.72;PTPMT1|0.71;ERLIN1|0.69;PDHB|0.67;SERINC1|0.62;HSD17B4|0.54	12	1383	107	38520	http://www.ebi.ac.uk/QuickGO/GTerm?id=GO:0044255
4	4	cellular macromolecule localization	GO:0070727	1.53×10-2	5.61×10-2	-2.19	-0.97	1.05743	-10.6873	CLIP1|1.66;SRI|1.57;DDOST|0.74;BSG|0.73;HM13|0.71;NDUFA13|0.7;CDK1|0.69;ATP1B1|0.69;DNAJA3|0.69;SEC62|0.68;PHB2|0.67;PARP1|0.66;ASPH|0.63	13	2391	107	38520	http://www.ebi.ac.uk/QuickGO/GTerm?id=GO:0070727
4	4	cellular macromolecule metabolic process	GO:0044260	2.20×10-3	1.75×10-2	-10.96	-6.44	1.05743	-10.6873	CDKN2A|1.86;GTF2F1|1.8;PSMA1|1.74;GIGYF2|1.72;SLK|1.69;SRRM1|1.69;DBNL|1.6;S100A11|1.58;PPP1R12A|1.54;UBE2K|1.53;DDOST|0.74;MRPL21|0.74;ATP6V0D1|0.74;AIFM1|0.74;SMARCA4|0.74;FKBP10|0.73;ITGA5|0.73;STT3A|0.73;HDAC2|0.73;SLTM|0.73;MRPL54|0.72;NARS2|0.72;YBX3|0.72;SERPINH1|0.72;DHX30|0.72;GLS|0.72;TRRAP|0.72;TUFM|0.71;MLEC|0.71;PTPMT1|0.71;C1QBP|0.7;SMARCA5|0.7;CTSS|0.7;NDUFA13|0.7;CARS2|0.7;CSPG4|0…	62	16863	107	38520	http://www.ebi.ac.uk/QuickGO/GTerm?id=GO:0044260
4	4	cellular nitrogen compound metabolic process	GO:0034641	3.48×10-4	5.06×10-3	-9.01	-5.23	1.05743	-10.6873	CDKN2A|1.86;GTF2F1|1.8;PSMA1|1.74;GIGYF2|1.72;SRRM1|1.69;S100A11|1.58;PPP1R12A|1.54;DDOST|0.74;LPCAT1|0.74;MRPL21|0.74;AIFM1|0.74;PDHA1|0.74;SMARCA4|0.74;OAT|0.73;DLD|0.73;HDAC2|0.73;SLTM|0.73;MRPL54|0.72;NARS2|0.72;ATP5L|0.72;YBX3|0.72;DHX30|0.72;GLS|0.72;TRRAP|0.72;TUFM|0.71;NDUFA10|0.71;C1QBP|0.7;SMARCA5|0.7;NDUFA13|0.7;CARS2|0.7;NUP210|0.69;ERLIN1|0.69;CDK1|0.69;DNAJA3|0.69;PNPT1|0.69;HNRNPR|…	52	12470	107	38520	http://www.ebi.ac.uk/QuickGO/GTerm?id=GO:0034641
4	4	cellular response to abiotic stimulus	GO:0071214	4.81×10-2	1.08×10-1	-0.21	0.27	1.05743	-10.6873	TMEM109|1.61;YBX3|0.72;CYBA|0.7	3	292	107	38520	http://www.ebi.ac.uk/QuickGO/GTerm?id=GO:0071214
4	4	cellular response to chemical stimulus	GO:0070887	8.57×10-5	1.82×10-3	-3.92	-2.04	1.05743	-10.6873	NDRG1|1.88;SRI|1.57;ATP6V0D1|0.74;ITGA5|0.73;HDAC2|0.73;YBX3|0.72;C1QBP|0.7;CYBA|0.7;CTSS|0.7;NDUFA13|0.7;NUP210|0.69;CDK1|0.69;DNAJA3|0.69;PNPT1|0.69;HYOU1|0.69;SEC62|0.68;FUS|0.67;PARP1|0.66;MYDGF|0.65;ASPH|0.63;ERO1L|0.58;CD44|0.47	22	3280	107	38520	http://www.ebi.ac.uk/QuickGO/GTerm?id=GO:0070887
4	4	cellular response to stress	GO:0033554	5.47×10-9	1.51×10-6	-5.42	-2.98	1.05743	-10.6873	NDRG1|1.88;CDKN2A|1.86;PSMA1|1.74;GIGYF2|1.72;SLK|1.69;TMEM109|1.61;DBNL|1.6;UBE2K|1.53;ATP6V0D1|0.74;AIFM1|0.74;HDAC2|0.73;YBX3|0.72;TRRAP|0.72;HM13|0.71;SMARCA5|0.7;NUP210|0.69;ERLIN1|0.69;CDK1|0.69;ATP1B1|0.69;PNPT1|0.69;HYOU1|0.69;SEC62|0.68;PARP1|0.66;MYDGF|0.65;TOP2A|0.6;ERO1L|0.58;SSRP1|0.5;CD44|0.47	28	2945	107	38520	http://www.ebi.ac.uk/QuickGO/GTerm?id=GO:0033554
4	4	circadian regulation of gene expression	GO:0032922	1.22×10-2	4.81×10-2	-0.3	0.21	1.05743	-10.6873	HDAC2|0.73;TOP1|0.68	2	60	107	38520	http://www.ebi.ac.uk/QuickGO/GTerm?id=GO:0032922
4	4	coagulation	GO:0050817	2.61×10-4	4.12×10-3	-1.4	-0.47	1.05743	-10.6873	BSG|0.73;ITGA5|0.73;HDAC2|0.73;KIF2A|0.71;C1QBP|0.7;ATP1B1|0.69;SLC7A5|0.63;CD44|0.47	8	594	107	38520	http://www.ebi.ac.uk/QuickGO/GTerm?id=GO:0050817
4	4	cofactor metabolic process	GO:0051186	3.19×10-4	4.71×10-3	-1.33	-0.43	1.05743	-10.6873	SLC25A1|0.74;TECR|0.74;PDHA1|0.74;DLD|0.73;MDH2|0.68;PDHB|0.67;MCCC2|0.64;HSD17B4|0.54	8	612	107	38520	http://www.ebi.ac.uk/QuickGO/GTerm?id=GO:0051186
4	4	development of secondary sexual characteristics	GO:0045136	3.01×10-2	8.34×10-2	0	0.4	1.05743	-10.6873	PHB2|0.67	1	11	107	38520	http://www.ebi.ac.uk/QuickGO/GTerm?id=GO:0045136
4	4	ectodermal placode development	GO:0071696	4.88×10-2	1.08×10-1	0	0.4	1.05743	-10.6873	HDAC2|0.73	1	18	107	38520	http://www.ebi.ac.uk/QuickGO/GTerm?id=GO:0071696
4	4	ectodermal placode formation	GO:0060788	4.88×10-2	1.08×10-1	0	0.4	1.05743	-10.6873	HDAC2|0.73	1	18	107	38520	http://www.ebi.ac.uk/QuickGO/GTerm?id=GO:0060788
4	4	ectodermal placode morphogenesis	GO:0071697	4.88×10-2	1.08×10-1	0	0.4	1.05743	-10.6873	HDAC2|0.73	1	18	107	38520	http://www.ebi.ac.uk/QuickGO/GTerm?id=GO:0071697
4	4	embryo development	GO:0009790	1.12×10-2	4.48×10-2	-1.29	-0.4	1.05743	-10.6873	DLD|0.73;ITGA5|0.73;HDAC2|0.73;YBX3|0.72;CDK1|0.69;TOP1|0.68;ITGB4|0.65;TOP2A|0.6	8	1090	107	38520	http://www.ebi.ac.uk/QuickGO/GTerm?id=GO:0009790
4	4	endomembrane system organization	GO:0010256	1.06×10-2	4.46×10-2	-1.11	-0.29	1.05743	-10.6873	NDRG1|1.88;CLIP1|1.66;BSG|0.73;NUP210|0.69;CDK1|0.69;ATP1B1|0.69	6	662	107	38520	http://www.ebi.ac.uk/QuickGO/GTerm?id=GO:0010256
4	4	establishment of localization in cell	GO:0051649	1.12×10-2	4.49×10-2	-3.28	-1.65	1.05743	-10.6873	SRRM1|1.69;CLIP1|1.66;SRI|1.57;PPP1R12A|1.54;DDOST|0.74;BSG|0.73;ATP5L|0.72;GLS|0.72;HM13|0.71;CYBA|0.7;LSG1|0.7;NDUFA13|0.7;ATP1B1|0.69;PNPT1|0.69;SEC62|0.68;PHB2|0.67;PARP1|0.66;ASPH|0.63;ERO1L|0.58	19	3916	107	38520	http://www.ebi.ac.uk/QuickGO/GTerm?id=GO:0051649
4	4	extracellular structure organization	GO:0043062	1.89×10-4	3.25×10-3	-1.32	-0.42	1.05743	-10.6873	BSG|0.73;ITGA5|0.73;SERPINH1|0.72;CTSS|0.7;ITGB4|0.65;ERO1L|0.58;CD44|0.47	7	424	107	38520	http://www.ebi.ac.uk/QuickGO/GTerm?id=GO:0043062
4	4	eyelid development in camera-type eye	GO:0061029	3.01×10-2	8.34×10-2	0	0.4	1.05743	-10.6873	HDAC2|0.73	1	11	107	38520	http://www.ebi.ac.uk/QuickGO/GTerm?id=GO:0061029
4	4	formation of primary germ layer	GO:0001704	4.55×10-2	1.05×10-1	-0.32	0.2	1.05743	-10.6873	ITGA5|0.73;ITGB4|0.65	2	122	107	38520	http://www.ebi.ac.uk/QuickGO/GTerm?id=GO:0001704
4	4	fungiform papilla formation	GO:0061198	8.31×10-3	3.76×10-2	0	0.4	1.05743	-10.6873	HDAC2|0.73	1	3	107	38520	http://www.ebi.ac.uk/QuickGO/GTerm?id=GO:0061198
4	4	fungiform papilla morphogenesis	GO:0061197	1.38×10-2	5.13×10-2	0	0.4	1.05743	-10.6873	HDAC2|0.73	1	5	107	38520	http://www.ebi.ac.uk/QuickGO/GTerm?id=GO:0061197
4	4	generation of precursor metabolites and energy	GO:0006091	7.99×10-5	1.73×10-3	-1.38	-0.46	1.05743	-10.6873	PDHA1|0.74;DLD|0.73;ATP5L|0.72;NDUFA10|0.71;NDUFA13|0.7;PNPT1|0.69;MDH2|0.68;CS|0.68;PDHB|0.67	9	643	107	38520	http://www.ebi.ac.uk/QuickGO/GTerm?id=GO:0006091
4	4	glycosyl compound metabolic process	GO:1901657	2.88×10-2	8.22×10-2	-0.75	-0.07	1.05743	-10.6873	PDHA1|0.74;DLD|0.73;ATP5L|0.72;NDUFA10|0.71;MCCC2|0.64	5	615	107	38520	http://www.ebi.ac.uk/QuickGO/GTerm?id=GO:1901657
4	4	heterocycle metabolic process	GO:0046483	5.69×10-3	3.02×10-2	-7.63	-4.37	1.05743	-10.6873	CDKN2A|1.86;GTF2F1|1.8;SRRM1|1.69;S100A11|1.58;PPP1R12A|1.54;AIFM1|0.74;MUT|0.74;PDHA1|0.74;SMARCA4|0.74;OAT|0.73;DLD|0.73;HDAC2|0.73;SLTM|0.73;NARS2|0.72;ATP5L|0.72;YBX3|0.72;DHX30|0.72;GLS|0.72;TRRAP|0.72;NDUFA10|0.71;C1QBP|0.7;SMARCA5|0.7;NDUFA13|0.7;CARS2|0.7;NUP210|0.69;ERLIN1|0.69;CDK1|0.69;DNAJA3|0.69;PNPT1|0.69;HNRNPR|0.69;USP39|0.69;TOP1|0.68;MDH2|0.68;PHB2|0.67;FUS|0.67;PARP1|0.66;MYDGF…	44	11266	107	38520	http://www.ebi.ac.uk/QuickGO/GTerm?id=GO:0046483
4	4	homeostatic process	GO:0042592	1.74×10-3	1.52×10-2	-2.19	-0.96	1.05743	-10.6873	GIGYF2|1.72;SRI|1.57;SFXN3|0.74;LPCAT1|0.74;ATP6V0D1|0.74;AIFM1|0.74;DLD|0.73;CYBA|0.7;ATP1B1|0.69;DNAJA3|0.69;PARP1|0.66;ASPH|0.63;ERO1L|0.58	13	1834	107	38520	http://www.ebi.ac.uk/QuickGO/GTerm?id=GO:0042592
4	4	lipid metabolic process	GO:0006629	1.98×10-3	1.64×10-2	-2.09	-0.9	1.05743	-10.6873	LPCAT1|0.74;SLC25A1|0.74;TECR|0.74;MUT|0.74;PDHA1|0.74;DLD|0.73;ECH1|0.72;PTPMT1|0.71;ERLIN1|0.69;PDHB|0.67;NCEH1|0.63;SERINC1|0.62;HSD17B4|0.54	13	1861	107	38520	http://www.ebi.ac.uk/QuickGO/GTerm?id=GO:0006629
4	4	macromolecular complex subunit organization	GO:0043933	9.70×10-6	3.37×10-4	-4.54	-2.43	1.05743	-10.6873	CDKN2A|1.86;STMN1|1.67;CLIP1|1.66;DBNL|1.6;MRPL21|0.74;AIFM1|0.74;SMARCA4|0.74;OAT|0.73;HDAC2|0.73;MRPL54|0.72;SERPINH1|0.72;GLS|0.72;TRRAP|0.72;HM13|0.71;KIF2A|0.71;C1QBP|0.7;CYBA|0.7;SMARCA5|0.7;PNPT1|0.69;USP39|0.69;TOP1|0.68;AURKAIP1|0.68;ACAD9|0.64;ASPH|0.63;BMS1|0.54;SSRP1|0.5	26	3761	107	38520	http://www.ebi.ac.uk/QuickGO/GTerm?id=GO:0043933
4	4	macromolecule metabolic process	GO:0043170	1.12×10-3	1.16×10-2	-11.87	-7.01	1.05743	-10.6873	CDKN2A|1.86;GTF2F1|1.8;PSMA1|1.74;GIGYF2|1.72;SLK|1.69;SRRM1|1.69;DBNL|1.6;S100A11|1.58;SRI|1.57;PPP1R12A|1.54;UBE2K|1.53;DDOST|0.74;LPCAT1|0.74;MRPL21|0.74;ATP6V0D1|0.74;AIFM1|0.74;SMARCA4|0.74;FKBP10|0.73;DLD|0.73;ITGA5|0.73;STT3A|0.73;HDAC2|0.73;GNS|0.73;SLTM|0.73;MRPL54|0.72;NARS2|0.72;YBX3|0.72;SERPINH1|0.72;DHX30|0.72;GLS|0.72;TRRAP|0.72;TUFM|0.71;MLEC|0.71;HM13|0.71;PTPMT1|0.71;C1QBP|0.7;S…	68	18641	107	38520	http://www.ebi.ac.uk/QuickGO/GTerm?id=GO:0043170
4	3,4	maintenance of location	GO:0051235	1.27×10-2	4.96×10-2	-0.79	-0.09	1.05743	-10.6873	SRI|1.57;CYBA|0.7;ASPH|0.63;ERO1L|0.58	4	323	107	38520	http://www.ebi.ac.uk/QuickGO/GTerm?id=GO:0051235
4	4	mammary gland branching involved in thelarche	GO:0060744	1.66×10-2	5.78×10-2	0	0.4	1.05743	-10.6873	PHB2|0.67	1	6	107	38520	http://www.ebi.ac.uk/QuickGO/GTerm?id=GO:0060744
4	4	membrane organization	GO:0061024	8.15×10-3	3.76×10-2	-1.73	-0.68	1.05743	-10.6873	NDRG1|1.88;CLIP1|1.66;DDOST|0.74;BSG|0.73;NDUFA13|0.7;NUP210|0.69;CDK1|0.69;ATP1B1|0.69;DNAJA3|0.69;SEC62|0.68	10	1478	107	38520	http://www.ebi.ac.uk/QuickGO/GTerm?id=GO:0061024
4	4	movement of cell or subcellular component	GO:0006928	1.53×10-2	5.62×10-2	-2.33	-1.05	1.05743	-10.6873	STMN1|1.67;SRI|1.57;BSG|0.73;ALCAM|0.73;ITGA5|0.73;KIF2A|0.71;C1QBP|0.7;CSPG4|0.69;CDK1|0.69;ATP1B1|0.69;ITGB4|0.65;SLC7A5|0.63;CD44|0.47	13	2392	107	38520	http://www.ebi.ac.uk/QuickGO/GTerm?id=GO:0006928
4	4	multicellular organismal development	GO:0007275	6.83×10-6	2.62×10-4	-5.98	-3.33	1.05743	-10.6873	NDRG1|1.88;GIGYF2|1.72;STMN1|1.67;DBNL|1.6;SRI|1.57;S100A6|1.52;LPCAT1|0.74;ATP6V0D1|0.74;AIFM1|0.74;MUT|0.74;SMARCA4|0.74;BSG|0.73;ACP2|0.73;DLD|0.73;ALCAM|0.73;ITGA5|0.73;HDAC2|0.73;YBX3|0.72;SERPINH1|0.72;KIF2A|0.71;C1QBP|0.7;CSPG4|0.69;CDK1|0.69;DNAJA3|0.69;TOP1|0.68;PHB2|0.67;PARP1|0.66;MYDGF|0.65;ITGB4|0.65;SLC7A5|0.63;ASPH|0.63;TOP2A|0.6;HSD17B4|0.54;CD44|0.47	34	5689	107	38520	http://www.ebi.ac.uk/QuickGO/GTerm?id=GO:0007275
4	4	multicellular organismal metabolic process	GO:0044236	7.08×10-3	3.53×10-2	-0.43	0.13	1.05743	-10.6873	HDAC2|0.73;SERPINH1|0.72;CTSS|0.7	3	140	107	38520	http://www.ebi.ac.uk/QuickGO/GTerm?id=GO:0044236
4	4	nail development	GO:0035878	2.20×10-2	6.88×10-2	0	0.4	1.05743	-10.6873	ITGB4|0.65	1	8	107	38520	http://www.ebi.ac.uk/QuickGO/GTerm?id=GO:0035878
4	4	negative regulation of biosynthetic process	GO:0009890	2.66×10-4	4.15×10-3	-2.39	-1.09	1.05743	-10.6873	CDKN2A|1.86;GIGYF2|1.72;S100A11|1.58;LPCAT1|0.74;SMARCA4|0.74;HDAC2|0.73;YBX3|0.72;C1QBP|0.7;SMARCA5|0.7;NDUFA13|0.7;ERLIN1|0.69;DNAJA3|0.69;PHB2|0.67;PARP1|0.66	14	1702	107	38520	http://www.ebi.ac.uk/QuickGO/GTerm?id=GO:0009890
4	4	negative regulation of cell cycle	GO:0045786	7.08×10-6	2.68×10-4	-1.87	-0.76	1.05743	-10.6873	CDKN2A|1.86;PSMA1|1.74;GIGYF2|1.72;SMARCA4|0.74;HDAC2|0.73;TRRAP|0.72;CDK1|0.69;PNPT1|0.69;AURKAIP1|0.68;TOP2A|0.6	10	600	107	38520	http://www.ebi.ac.uk/QuickGO/GTerm?id=GO:0045786
4	4	negative regulation of cell growth	GO:0030308	8.55×10-3	3.83×10-2	-0.27	0.23	1.05743	-10.6873	CDKN2A|1.86;SMARCA4|0.74;NDUFA13|0.7	3	150	107	38520	http://www.ebi.ac.uk/QuickGO/GTerm?id=GO:0030308
4	4	negative regulation of cellular response to hypoxia	GO:1900038	1.11×10-2	4.47×10-2	0	0.4	1.05743	-10.6873	HYOU1|0.69	1	4	107	38520	http://www.ebi.ac.uk/QuickGO/GTerm?id=GO:1900038
4	4	negative regulation of glomerular filtration	GO:0003105	1.66×10-2	5.78×10-2	0	0.4	1.05743	-10.6873	CYBA|0.7	1	6	107	38520	http://www.ebi.ac.uk/QuickGO/GTerm?id=GO:0003105
4	4	negative regulation of lipid metabolic process	GO:0045833	2.15×10-2	6.88×10-2	-0.29	0.22	1.05743	-10.6873	LPCAT1|0.74;ERLIN1|0.69	2	81	107	38520	http://www.ebi.ac.uk/QuickGO/GTerm?id=GO:0045833
4	4	negative regulation of mammary gland epithelial cell proliferation	GO:0033600	1.38×10-2	5.13×10-2	0	0.4	1.05743	-10.6873	PHB2|0.67	1	5	107	38520	http://www.ebi.ac.uk/QuickGO/GTerm?id=GO:0033600
4	4	negative regulation of molecular function	GO:0044092	1.16×10-2	4.62×10-2	-0.89	-0.16	1.05743	-10.6873	CDKN2A|1.86;PSMA1|1.74;SRI|1.57;PPP1R12A|1.54;HDAC2|0.73;SERPINH1|0.72;DNAJA3|0.69;PHB2|0.67;CD44|0.47	9	1325	107	38520	http://www.ebi.ac.uk/QuickGO/GTerm?id=GO:0044092
4	4	negative regulation of nitrogen compound metabolic process	GO:0051172	1.01×10-3	1.09×10-2	-2.22	-0.99	1.05743	-10.6873	CDKN2A|1.86;GIGYF2|1.72;S100A11|1.58;LPCAT1|0.74;SMARCA4|0.74;HDAC2|0.73;YBX3|0.72;C1QBP|0.7;SMARCA5|0.7;NDUFA13|0.7;DNAJA3|0.69;PHB2|0.67;PARP1|0.66	13	1727	107	38520	http://www.ebi.ac.uk/QuickGO/GTerm?id=GO:0051172
4	4	negative regulation of sequestering of calcium ion	GO:0051283	1.60×10-4	2.92×10-3	-0.79	-0.09	1.05743	-10.6873	SRI|1.57;CYBA|0.7;ASPH|0.63;ERO1L|0.58	4	97	107	38520	http://www.ebi.ac.uk/QuickGO/GTerm?id=GO:0051283
4	3,4	negative regulation of signaling	GO:0023057	1.27×10-2	4.94×10-2	-1.65	-0.63	1.05743	-10.6873	PSMA1|1.74;SMARCA4|0.74;YBX3|0.72;C1QBP|0.7;NDUFA13|0.7;DNAJA3|0.69;HYOU1|0.69;PHB2|0.67;CD44|0.47	9	1344	107	38520	http://www.ebi.ac.uk/QuickGO/GTerm?id=GO:0023057
4	4	nucleobase-containing compound metabolic process	GO:0006139	1.77×10-2	6.06×10-2	-7.13	-4.05	1.05743	-10.6873	CDKN2A|1.86;GTF2F1|1.8;SRRM1|1.69;S100A11|1.58;PPP1R12A|1.54;AIFM1|0.74;PDHA1|0.74;SMARCA4|0.74;DLD|0.73;HDAC2|0.73;SLTM|0.73;NARS2|0.72;ATP5L|0.72;YBX3|0.72;DHX30|0.72;GLS|0.72;TRRAP|0.72;NDUFA10|0.71;C1QBP|0.7;SMARCA5|0.7;NDUFA13|0.7;CARS2|0.7;NUP210|0.69;ERLIN1|0.69;CDK1|0.69;DNAJA3|0.69;PNPT1|0.69;HNRNPR|0.69;USP39|0.69;TOP1|0.68;MDH2|0.68;PHB2|0.67;FUS|0.67;PARP1|0.66;MYDGF|0.65;MCCC2|0.64;L…	41	10973	107	38520	http://www.ebi.ac.uk/QuickGO/GTerm?id=GO:0006139
4	4	organelle organization	GO:0006996	3.87×10-5	1.01×10-3	-5.75	-3.19	1.05743	-10.6873	CDKN2A|1.86;STMN1|1.67;CLIP1|1.66;DBNL|1.6;PPP1R12A|1.54;MRPL21|0.74;ATP6V0D1|0.74;AIFM1|0.74;SMARCA4|0.74;ACP2|0.73;HDAC2|0.73;MRPL54|0.72;TRRAP|0.72;TUFM|0.71;KIF2A|0.71;C1QBP|0.7;CYBA|0.7;SMARCA5|0.7;NDUFA13|0.7;NUP210|0.69;CDK1|0.69;ATP1B1|0.69;DNAJA3|0.69;PNPT1|0.69;TOP1|0.68;POLDIP2|0.68;AURKAIP1|0.68;PHB2|0.67;PARP1|0.66;ACAD9|0.64;TOP2A|0.6;BMS1|0.54;SSRP1|0.5	33	5894	107	38520	http://www.ebi.ac.uk/QuickGO/GTerm?id=GO:0006996
4	4	organic acid metabolic process	GO:0006082	9.10×10-12	5.85×10-9	-4.28	-2.27	1.05743	-10.6873	PSMA1|1.74;TECR|0.74;MUT|0.74;PDHA1|0.74;OAT|0.73;BSG|0.73;DLD|0.73;GNS|0.73;ECH1|0.72;NARS2|0.72;GLS|0.72;CARS2|0.7;CSPG4|0.69;ERLIN1|0.69;ETHE1|0.68;MDH2|0.68;CS|0.68;PDHB|0.67;MCCC2|0.64;LARS2|0.64;SLC7A5|0.63;SERINC1|0.62;PCYOX1|0.61;ERO1L|0.58;HSD17B4|0.54	25	1739	107	38520	http://www.ebi.ac.uk/QuickGO/GTerm?id=GO:0006082
4	4	organic cyclic compound metabolic process	GO:1901360	5.38×10-3	2.96×10-2	-7.9	-4.53	1.05743	-10.6873	CDKN2A|1.86;GTF2F1|1.8;SRRM1|1.69;S100A11|1.58;PPP1R12A|1.54;AIFM1|0.74;MUT|0.74;PDHA1|0.74;SMARCA4|0.74;OAT|0.73;DLD|0.73;HDAC2|0.73;SLTM|0.73;NARS2|0.72;ATP5L|0.72;YBX3|0.72;DHX30|0.72;GLS|0.72;TRRAP|0.72;NDUFA10|0.71;C1QBP|0.7;SMARCA5|0.7;NDUFA13|0.7;CARS2|0.7;NUP210|0.69;ERLIN1|0.69;CDK1|0.69;DNAJA3|0.69;PNPT1|0.69;HNRNPR|0.69;USP39|0.69;TOP1|0.68;MDH2|0.68;PHB2|0.67;FUS|0.67;PARP1|0.66;MYDGF…	45	11563	107	38520	http://www.ebi.ac.uk/QuickGO/GTerm?id=GO:1901360
4	4	organic substance biosynthetic process	GO:1901576	1.84×10-6	9.84×10-5	-9.25	-5.37	1.05743	-10.6873	CDKN2A|1.86;GTF2F1|1.8;GIGYF2|1.72;SRRM1|1.69;S100A11|1.58;PPP1R12A|1.54;DDOST|0.74;LPCAT1|0.74;SLC25A1|0.74;MRPL21|0.74;TECR|0.74;PDHA1|0.74;SMARCA4|0.74;OAT|0.73;DLD|0.73;STT3A|0.73;HDAC2|0.73;SLTM|0.73;MRPL54|0.72;NARS2|0.72;ATP5L|0.72;YBX3|0.72;SERPINH1|0.72;GLS|0.72;TRRAP|0.72;TUFM|0.71;MLEC|0.71;PTPMT1|0.71;NDUFA10|0.71;C1QBP|0.7;SMARCA5|0.7;NDUFA13|0.7;CARS2|0.7;CSPG4|0.69;NUP210|0.69;ERLI…	54	11084	107	38520	http://www.ebi.ac.uk/QuickGO/GTerm?id=GO:1901576
4	4	organic substance catabolic process	GO:1901575	4.50×10-8	6.99×10-6	-4.47	-2.39	1.05743	-10.6873	PSMA1|1.74;UBE2K|1.53;LPCAT1|0.74;AIFM1|0.74;MUT|0.74;PDHA1|0.74;DLD|0.73;GNS|0.73;ECH1|0.72;GLS|0.72;HM13|0.71;PTPMT1|0.71;CTSS|0.7;NDUFA13|0.7;CSPG4|0.69;ERLIN1|0.69;CDK1|0.69;PNPT1|0.69;USP39|0.69;ETHE1|0.68;CLPX|0.67;MCCC2|0.64;NCEH1|0.63;PCYOX1|0.61;HSD17B4|0.54;CD44|0.47	26	2833	107	38520	http://www.ebi.ac.uk/QuickGO/GTerm?id=GO:1901575
4	4	organonitrogen compound metabolic process	GO:1901564	9.16×10-9	1.96×10-6	-5.35	-2.94	1.05743	-10.6873	PSMA1|1.74;GIGYF2|1.72;DDOST|0.74;LPCAT1|0.74;MRPL21|0.74;MUT|0.74;PDHA1|0.74;OAT|0.73;DLD|0.73;GNS|0.73;MRPL54|0.72;NARS2|0.72;ATP5L|0.72;YBX3|0.72;GLS|0.72;TUFM|0.71;NDUFA10|0.71;C1QBP|0.7;CARS2|0.7;CSPG4|0.69;ETHE1|0.68;MDH2|0.68;AURKAIP1|0.68;MCCC2|0.64;LARS2|0.64;SLC7A5|0.63;SERINC1|0.62;PCYOX1|0.61;ERO1L|0.58;GSTK1|0.56;CD44|0.47	31	3643	107	38520	http://www.ebi.ac.uk/QuickGO/GTerm?id=GO:1901564
4	4	oxidation-reduction process	GO:0055114	4.28×10-8	6.99×10-6	-3.93	-2.05	1.05743	-10.6873	TECR|0.74;AIFM1|0.74;MUT|0.74;PDHA1|0.74;DLD|0.73;ECH1|0.72;ATP5L|0.72;NDUFA10|0.71;CYBA|0.7;NDUFA13|0.7;DHRS7|0.69;CYB5B|0.69;PNPT1|0.69;ETHE1|0.68;MDH2|0.68;CS|0.68;PDHB|0.67;ACAD9|0.64;ASPH|0.63;PCYOX1|0.61;ERO1L|0.58;GSTK1|0.56;HSD17B4|0.54	23	2240	107	38520	http://www.ebi.ac.uk/QuickGO/GTerm?id=GO:0055114
4	4	phosphorus metabolic process	GO:0006793	1.24×10-3	1.25×10-2	-4.89	-2.65	1.05743	-10.6873	CDKN2A|1.86;SLK|1.69;DBNL|1.6;PPP1R12A|1.54;LPCAT1|0.74;SLC25A1|0.74;TECR|0.74;PDHA1|0.74;ACP2|0.73;DLD|0.73;ITGA5|0.73;HDAC2|0.73;ATP5L|0.72;TRRAP|0.72;PTPMT1|0.71;NDUFA10|0.71;CSPG4|0.69;CDK1|0.69;DNAJA3|0.69;TOP1|0.68;MDH2|0.68;PHB2|0.67;PDHB|0.67;MYDGF|0.65;MCCC2|0.64;SERINC1|0.62;HSD17B4|0.54;CD44|0.47	28	5625	107	38520	http://www.ebi.ac.uk/QuickGO/GTerm?id=GO:0006793
4	4	positive regulation of biosynthetic process	GO:0009891	1.74×10-3	1.52×10-2	-2.59	-1.21	1.05743	-10.6873	GTF2F1|1.8;PPP1R12A|1.54;SMARCA4|0.74;HDAC2|0.73;YBX3|0.72;C1QBP|0.7;CYBA|0.7;ERLIN1|0.69;PHB2|0.67;PARP1|0.66;MYDGF|0.65;ASPH|0.63;TOP2A|0.6;SSRP1|0.5	14	2065	107	38520	http://www.ebi.ac.uk/QuickGO/GTerm?id=GO:0009891
4	4	positive regulation of cellular senescence	GO:2000774	1.11×10-2	4.47×10-2	0	0.4	1.05743	-10.6873	CDKN2A|1.86	1	4	107	38520	http://www.ebi.ac.uk/QuickGO/GTerm?id=GO:2000774
4	4	positive regulation of defense response to bacterium	GO:1900426	1.11×10-2	4.47×10-2	0	0.4	1.05743	-10.6873	CYBA|0.7	1	4	107	38520	http://www.ebi.ac.uk/QuickGO/GTerm?id=GO:1900426
4	4	positive regulation of immune response	GO:0050778	3.55×10-2	9.17×10-2	-1.04	-0.25	1.05743	-10.6873	PSMA1|1.74;C1QBP|0.7;CYBA|0.7;CTSS|0.7;CDK1|0.69;PHB2|0.67	6	875	107	38520	http://www.ebi.ac.uk/QuickGO/GTerm?id=GO:0050778
4	4	positive regulation of molecular function	GO:0044093	5.60×10-4	7.16×10-3	-3.08	-1.52	1.05743	-10.6873	GTF2F1|1.8;PSMA1|1.74;SLK|1.69;DBNL|1.6;AIFM1|0.74;SMARCA4|0.74;CTSS|0.7;NDUFA13|0.7;CSPG4|0.69;CDK1|0.69;ATP1B1|0.69;DNAJA3|0.69;PHB2|0.67;CLPX|0.67;PARP1|0.66;ASPH|0.63;SERINC1|0.62	17	2514	107	38520	http://www.ebi.ac.uk/QuickGO/GTerm?id=GO:0044093
4	4	positive regulation of mucus secretion	GO:0070257	1.93×10-2	6.37×10-2	0	0.4	1.05743	-10.6873	CYBA|0.7	1	7	107	38520	http://www.ebi.ac.uk/QuickGO/GTerm?id=GO:0070257
4	4	positive regulation of nitrogen compound metabolic process	GO:0051173	1.68×10-3	1.51×10-2	-2.6	-1.22	1.05743	-10.6873	GTF2F1|1.8;PPP1R12A|1.54;SMARCA4|0.74;HDAC2|0.73;YBX3|0.72;C1QBP|0.7;ERLIN1|0.69;PNPT1|0.69;PHB2|0.67;PARP1|0.66;MYDGF|0.65;ASPH|0.63;TOP2A|0.6;SSRP1|0.5	14	2057	107	38520	http://www.ebi.ac.uk/QuickGO/GTerm?id=GO:0051173
4	4	positive regulation of response to external stimulus	GO:0032103	2.14×10-2	6.88×10-2	-0.63	0.01	1.05743	-10.6873	C1QBP|0.7;CYBA|0.7;CTSS|0.7;ATP1B1|0.69	4	378	107	38520	http://www.ebi.ac.uk/QuickGO/GTerm?id=GO:0032103
4	4	positive regulation of transmembrane transport	GO:0034764	3.91×10-3	2.49×10-2	-0.52	0.08	1.05743	-10.6873	CTSS|0.7;ATP1B1|0.69;ASPH|0.63	3	113	107	38520	http://www.ebi.ac.uk/QuickGO/GTerm?id=GO:0034764
4	4	positive regulation of viral process	GO:0048524	2.01×10-4	3.41×10-3	-0.91	-0.17	1.05743	-10.6873	GTF2F1|1.8;SMARCA4|0.74;TOP2A|0.6;SSRP1|0.5	4	103	107	38520	http://www.ebi.ac.uk/QuickGO/GTerm?id=GO:0048524
4	4	post-embryonic development	GO:0009791	3.65×10-2	9.31×10-2	-0.1	0.34	1.05743	-10.6873	GIGYF2|1.72;MUT|0.74	2	108	107	38520	http://www.ebi.ac.uk/QuickGO/GTerm?id=GO:0009791
4	4	protein complex biogenesis	GO:0070271	4.20×10-3	2.58×10-2	-2.02	-0.86	1.05743	-10.6873	STMN1|1.67;CLIP1|1.66;DBNL|1.6;AIFM1|0.74;OAT|0.73;GLS|0.72;HM13|0.71;KIF2A|0.71;CYBA|0.7;SMARCA5|0.7;PNPT1|0.69;ACAD9|0.64	12	1795	107	38520	http://www.ebi.ac.uk/QuickGO/GTerm?id=GO:0070271
4	4	protein localization	GO:0008104	2.56×10-2	7.64×10-2	-2.64	-1.25	1.05743	-10.6873	CLIP1|1.66;SRI|1.57;DDOST|0.74;ATP6V0D1|0.74;BSG|0.73;HM13|0.71;LSG1|0.7;NDUFA13|0.7;NUP210|0.69;CDK1|0.69;ATP1B1|0.69;DNAJA3|0.69;SEC62|0.68;PHB2|0.67;PARP1|0.66;ASPH|0.63	16	3401	107	38520	http://www.ebi.ac.uk/QuickGO/GTerm?id=GO:0008104
4	4	protein metabolic process	GO:0019538	7.84×10-6	2.84×10-4	-8.72	-5.05	1.05743	-10.6873	CDKN2A|1.86;PSMA1|1.74;GIGYF2|1.72;SLK|1.69;DBNL|1.6;SRI|1.57;PPP1R12A|1.54;UBE2K|1.53;DDOST|0.74;LPCAT1|0.74;MRPL21|0.74;ATP6V0D1|0.74;AIFM1|0.74;FKBP10|0.73;DLD|0.73;ITGA5|0.73;STT3A|0.73;HDAC2|0.73;MRPL54|0.72;NARS2|0.72;YBX3|0.72;SERPINH1|0.72;TRRAP|0.72;TUFM|0.71;MLEC|0.71;HM13|0.71;PTPMT1|0.71;C1QBP|0.7;CTSS|0.7;NDUFA13|0.7;CARS2|0.7;CSPG4|0.69;NUP210|0.69;ERLIN1|0.69;CDK1|0.69;DNAJA3|0.69;…	51	10637	107	38520	http://www.ebi.ac.uk/QuickGO/GTerm?id=GO:0019538
4	4	regulation of binding	GO:0051098	3.51×10-2	9.17×10-2	-0.2	0.28	1.05743	-10.6873	SRI|1.57;HDAC2|0.73;PARP1|0.66	3	257	107	38520	http://www.ebi.ac.uk/QuickGO/GTerm?id=GO:0051098
4	4	regulation of biosynthetic process	GO:0009889	1.40×10-2	5.21×10-2	-5.42	-2.98	1.05743	-10.6873	CDKN2A|1.86;GTF2F1|1.8;GIGYF2|1.72;S100A11|1.58;PPP1R12A|1.54;LPCAT1|0.74;PDHA1|0.74;SMARCA4|0.74;DLD|0.73;HDAC2|0.73;SLTM|0.73;YBX3|0.72;TRRAP|0.72;C1QBP|0.7;CYBA|0.7;SMARCA5|0.7;NDUFA13|0.7;ERLIN1|0.69;CDK1|0.69;DNAJA3|0.69;PHB2|0.67;FUS|0.67;PDHB|0.67;PARP1|0.66;MYDGF|0.65;LARS2|0.64;ASPH|0.63;TOP2A|0.6;EWSR1|0.53;SSRP1|0.5	30	7294	107	38520	http://www.ebi.ac.uk/QuickGO/GTerm?id=GO:0009889
4	4	regulation of body fluid levels	GO:0050878	2.37×10-4	3.86×10-3	-1.56	-0.57	1.05743	-10.6873	BSG|0.73;ITGA5|0.73;HDAC2|0.73;KIF2A|0.71;C1QBP|0.7;CYBA|0.7;ATP1B1|0.69;SLC7A5|0.63;CD44|0.47	9	744	107	38520	http://www.ebi.ac.uk/QuickGO/GTerm?id=GO:0050878
4	4	regulation of cardiac conduction	GO:1903779	4.09×10-2	9.87×10-2	0	0.4	1.05743	-10.6873	SRI|1.57	1	15	107	38520	http://www.ebi.ac.uk/QuickGO/GTerm?id=GO:1903779
4	4	regulation of catabolic process	GO:0009894	1.10×10-2	4.47×10-2	-1.33	-0.43	1.05743	-10.6873	PSMA1|1.74;UBE2K|1.53;LPCAT1|0.74;AIFM1|0.74;NDUFA13|0.7;CDK1|0.69;ATP1B1|0.69;PNPT1|0.69	8	1087	107	38520	http://www.ebi.ac.uk/QuickGO/GTerm?id=GO:0009894
4	4	regulation of catalytic activity	GO:0050790	1.58×10-2	5.73×10-2	-3.37	-1.7	1.05743	-10.6873	CDKN2A|1.86;GTF2F1|1.8;PSMA1|1.74;SLK|1.69;DBNL|1.6;PPP1R12A|1.54;AIFM1|0.74;SERPINH1|0.72;NDUFA13|0.7;CSPG4|0.69;CDK1|0.69;ATP1B1|0.69;DNAJA3|0.69;CLPX|0.67;ASPH|0.63;SERINC1|0.62;CD44|0.47	17	3488	107	38520	http://www.ebi.ac.uk/QuickGO/GTerm?id=GO:0050790
4	4	regulation of cell adhesion	GO:0030155	4.17×10-2	1.00×10-1	-0.46	0.12	1.05743	-10.6873	CDKN2A|1.86;PPP1R12A|1.54;C1QBP|0.7;DNAJA3|0.69;CD44|0.47	5	681	107	38520	http://www.ebi.ac.uk/QuickGO/GTerm?id=GO:0030155
4	4	regulation of cell aging	GO:0090342	3.59×10-3	2.34×10-2	-0.11	0.33	1.05743	-10.6873	CDKN2A|1.86;PNPT1|0.69	2	32	107	38520	http://www.ebi.ac.uk/QuickGO/GTerm?id=GO:0090342
4	4	regulation of cell growth	GO:0001558	2.33×10-2	7.21×10-2	-0.71	-0.04	1.05743	-10.6873	CDKN2A|1.86;SMARCA4|0.74;CYBA|0.7;NDUFA13|0.7	4	388	107	38520	http://www.ebi.ac.uk/QuickGO/GTerm?id=GO:0001558
4	4	regulation of cell proliferation	GO:0042127	1.74×10-2	5.97×10-2	-1.94	-0.81	1.05743	-10.6873	NDRG1|1.88;CDKN2A|1.86;S100A11|1.58;S100A6|1.52;HDAC2|0.73;CYBA|0.7;DNAJA3|0.69;PHB2|0.67;MYDGF|0.65;ASPH|0.63	10	1663	107	38520	http://www.ebi.ac.uk/QuickGO/GTerm?id=GO:0042127
4	4	regulation of cellular component organization	GO:0051128	4.11×10-2	9.91×10-2	-2.28	-1.02	1.05743	-10.6873	CDKN2A|1.86;STMN1|1.67;CLIP1|1.66;AIFM1|0.74;SMARCA4|0.74;HDAC2|0.73;C1QBP|0.7;CYBA|0.7;NDUFA13|0.7;ATP1B1|0.69;AURKAIP1|0.68;PHB2|0.67;ASPH|0.63	13	2746	107	38520	http://www.ebi.ac.uk/QuickGO/GTerm?id=GO:0051128
4	4	regulation of growth rate	GO:0040009	8.31×10-3	3.76×10-2	0	0.4	1.05743	-10.6873	PARP1|0.66	1	3	107	38520	http://www.ebi.ac.uk/QuickGO/GTerm?id=GO:0040009
4	4	regulation of immune response	GO:0050776	4.90×10-2	1.08×10-1	-1.2	-0.35	1.05743	-10.6873	PSMA1|1.74;C1QBP|0.7;CYBA|0.7;CTSS|0.7;CDK1|0.69;DNAJA3|0.69;PHB2|0.67	7	1194	107	38520	http://www.ebi.ac.uk/QuickGO/GTerm?id=GO:0050776
4	3,4	regulation of metabolic process	GO:0019222	4.06×10-3	2.55×10-2	-8.21	-4.73	1.05743	-10.6873	CDKN2A|1.86;GTF2F1|1.8;PSMA1|1.74;GIGYF2|1.72;SLK|1.69;DBNL|1.6;S100A11|1.58;PPP1R12A|1.54;UBE2K|1.53;LPCAT1|0.74;AIFM1|0.74;PDHA1|0.74;SMARCA4|0.74;DLD|0.73;ITGA5|0.73;HDAC2|0.73;SLTM|0.73;YBX3|0.72;SERPINH1|0.72;TRRAP|0.72;C1QBP|0.7;CYBA|0.7;SMARCA5|0.7;NDUFA13|0.7;CSPG4|0.69;ERLIN1|0.69;CDK1|0.69;ATP1B1|0.69;DNAJA3|0.69;PNPT1|0.69;TOP1|0.68;AURKAIP1|0.68;PHB2|0.67;CLPX|0.67;FUS|0.67;PDHB|0.67;…	45	11404	107	38520	http://www.ebi.ac.uk/QuickGO/GTerm?id=GO:0019222
4	3,4	regulation of multi-organism process	GO:0043900	3.56×10-4	5.15×10-3	-1.38	-0.46	1.05743	-10.6873	GTF2F1|1.8;SMARCA4|0.74;C1QBP|0.7;CYBA|0.7;ATP1B1|0.69;TOP2A|0.6;SSRP1|0.5	7	471	107	38520	http://www.ebi.ac.uk/QuickGO/GTerm?id=GO:0043900
4	4	regulation of nitrogen compound metabolic process	GO:0051171	2.90×10-2	8.26×10-2	-5.36	-2.94	1.05743	-10.6873	CDKN2A|1.86;GTF2F1|1.8;PSMA1|1.74;GIGYF2|1.72;S100A11|1.58;PPP1R12A|1.54;LPCAT1|0.74;AIFM1|0.74;SMARCA4|0.74;HDAC2|0.73;SLTM|0.73;YBX3|0.72;TRRAP|0.72;C1QBP|0.7;SMARCA5|0.7;NDUFA13|0.7;ERLIN1|0.69;CDK1|0.69;DNAJA3|0.69;PNPT1|0.69;PHB2|0.67;FUS|0.67;PARP1|0.66;MYDGF|0.65;LARS2|0.64;ASPH|0.63;TOP2A|0.6;EWSR1|0.53;SSRP1|0.5	29	7397	107	38520	http://www.ebi.ac.uk/QuickGO/GTerm?id=GO:0051171
4	4	regulation of primary metabolic process	GO:0080090	1.68×10-3	1.51×10-2	-7.52	-4.3	1.05743	-10.6873	CDKN2A|1.86;GTF2F1|1.8;PSMA1|1.74;GIGYF2|1.72;SLK|1.69;DBNL|1.6;S100A11|1.58;PPP1R12A|1.54;UBE2K|1.53;LPCAT1|0.74;AIFM1|0.74;PDHA1|0.74;SMARCA4|0.74;DLD|0.73;ITGA5|0.73;HDAC2|0.73;SLTM|0.73;YBX3|0.72;SERPINH1|0.72;TRRAP|0.72;C1QBP|0.7;SMARCA5|0.7;NDUFA13|0.7;CSPG4|0.69;ERLIN1|0.69;CDK1|0.69;DNAJA3|0.69;PNPT1|0.69;AURKAIP1|0.68;PHB2|0.67;CLPX|0.67;FUS|0.67;PDHB|0.67;PARP1|0.66;MYDGF|0.65;LARS2|0.6…	41	9660	107	38520	http://www.ebi.ac.uk/QuickGO/GTerm?id=GO:0080090
4	4	regulation of protein stability	GO:0031647	2.27×10-3	1.78×10-2	-0.7	-0.03	1.05743	-10.6873	ATP1B1|0.69;DNAJA3|0.69;PHB2|0.67;ASPH|0.63	4	197	107	38520	http://www.ebi.ac.uk/QuickGO/GTerm?id=GO:0031647
4	4	regulation of response to biotic stimulus	GO:0002831	2.28×10-2	7.08×10-2	-0.47	0.11	1.05743	-10.6873	C1QBP|0.7;CYBA|0.7;ATP1B1|0.69	3	217	107	38520	http://www.ebi.ac.uk/QuickGO/GTerm?id=GO:0002831
4	4	regulation of response to stress	GO:0080134	2.83×10-5	7.92×10-4	-2.79	-1.34	1.05743	-10.6873	CDKN2A|1.86;PSMA1|1.74;DBNL|1.6;YBX3|0.72;C1QBP|0.7;CYBA|0.7;CTSS|0.7;NUP210|0.69;CDK1|0.69;ATP1B1|0.69;DNAJA3|0.69;PNPT1|0.69;HYOU1|0.69;PHB2|0.67;CD44|0.47	15	1564	107	38520	http://www.ebi.ac.uk/QuickGO/GTerm?id=GO:0080134
4	4	regulation of sequestering of calcium ion	GO:0051282	1.66×10-4	2.95×10-3	-0.79	-0.09	1.05743	-10.6873	SRI|1.57;CYBA|0.7;ASPH|0.63;ERO1L|0.58	4	98	107	38520	http://www.ebi.ac.uk/QuickGO/GTerm?id=GO:0051282
4	4	regulation of system process	GO:0044057	1.11×10-2	4.47×10-2	-0.86	-0.13	1.05743	-10.6873	SRI|1.57;GLS|0.72;CYBA|0.7;ATP1B1|0.69;ASPH|0.63	5	480	107	38520	http://www.ebi.ac.uk/QuickGO/GTerm?id=GO:0044057
4	4	response to drug	GO:0042493	3.81×10-2	9.50×10-2	-0.61	0.02	1.05743	-10.6873	HDAC2|0.73;NDUFA10|0.71;CYBA|0.7;TOP1|0.68	4	454	107	38520	http://www.ebi.ac.uk/QuickGO/GTerm?id=GO:0042493
4	4	response to external biotic stimulus	GO:0043207	4.24×10-2	1.01×10-1	-1.09	-0.28	1.05743	-10.6873	GTF2F1|1.8;STMN1|1.67;HDAC2|0.73;C1QBP|0.7;CYBA|0.7;ATP1B1|0.69	6	914	107	38520	http://www.ebi.ac.uk/QuickGO/GTerm?id=GO:0043207
4	4	response to heat	GO:0009408	1.11×10-2	4.47×10-2	-0.46	0.12	1.05743	-10.6873	HDAC2|0.73;NUP210|0.69;DNAJA3|0.69	3	165	107	38520	http://www.ebi.ac.uk/QuickGO/GTerm?id=GO:0009408
4	4	response to inorganic substance	GO:0010035	1.72×10-3	1.52×10-2	-1.1	-0.29	1.05743	-10.6873	NDRG1|1.88;BSG|0.73;HDAC2|0.73;FUS|0.67;PARP1|0.66;ASPH|0.63	6	454	107	38520	http://www.ebi.ac.uk/QuickGO/GTerm?id=GO:0010035
4	4	response to nitrogen compound	GO:1901698	2.60×10-2	7.72×10-2	-1.1	-0.29	1.05743	-10.6873	ATP6V0D1|0.74;BSG|0.73;HDAC2|0.73;CYBA|0.7;CDK1|0.69;PARP1|0.66;ASPH|0.63	7	1039	107	38520	http://www.ebi.ac.uk/QuickGO/GTerm?id=GO:1901698
4	4	response to organic substance	GO:0010033	6.34×10-6	2.55×10-4	-4.17	-2.2	1.05743	-10.6873	SRI|1.57;DDOST|0.74;ATP6V0D1|0.74;BSG|0.73;ACP2|0.73;ITGA5|0.73;HDAC2|0.73;YBX3|0.72;SERPINH1|0.72;HM13|0.71;CYBA|0.7;CTSS|0.7;NDUFA13|0.7;NUP210|0.69;ERLIN1|0.69;CDK1|0.69;DNAJA3|0.69;PNPT1|0.69;HYOU1|0.69;SEC62|0.68;PARP1|0.66;MYDGF|0.65;ASPH|0.63;ERO1L|0.58;CD44|0.47	25	3440	107	38520	http://www.ebi.ac.uk/QuickGO/GTerm?id=GO:0010033
4	4	response to organonitrogen compound	GO:0010243	1.61×10-2	5.78×10-2	-1.1	-0.29	1.05743	-10.6873	ATP6V0D1|0.74;BSG|0.73;HDAC2|0.73;CYBA|0.7;CDK1|0.69;PARP1|0.66;ASPH|0.63	7	941	107	38520	http://www.ebi.ac.uk/QuickGO/GTerm?id=GO:0010243
4	4	response to oxidative stress	GO:0006979	4.21×10-2	1.01×10-1	-0.71	-0.04	1.05743	-10.6873	HDAC2|0.73;PNPT1|0.69;PARP1|0.66;ERO1L|0.58	4	469	107	38520	http://www.ebi.ac.uk/QuickGO/GTerm?id=GO:0006979
4	4	response to oxygen levels	GO:0070482	9.94×10-3	4.24×10-2	-0.73	-0.06	1.05743	-10.6873	NDRG1|1.88;HDAC2|0.73;ATP1B1|0.69;HYOU1|0.69	4	300	107	38520	http://www.ebi.ac.uk/QuickGO/GTerm?id=GO:0070482
4	4	response to oxygen-containing compound	GO:1901700	4.02×10-3	2.54×10-2	-1.88	-0.77	1.05743	-10.6873	SRI|1.57;ATP6V0D1|0.74;BSG|0.73;HDAC2|0.73;CYBA|0.7;NDUFA13|0.7;CDK1|0.69;PARP1|0.66;MYDGF|0.65;ASPH|0.63;ERO1L|0.58	11	1555	107	38520	http://www.ebi.ac.uk/QuickGO/GTerm?id=GO:1901700
4	4	response to sterol depletion	GO:0006991	4.88×10-2	1.08×10-1	0	0.4	1.05743	-10.6873	ERLIN1|0.69	1	18	107	38520	http://www.ebi.ac.uk/QuickGO/GTerm?id=GO:0006991
4	4	response to temperature stimulus	GO:0009266	6.15×10-4	7.80×10-3	-0.84	-0.12	1.05743	-10.6873	HDAC2|0.73;YBX3|0.72;NUP210|0.69;DNAJA3|0.69;ERO1L|0.58	5	244	107	38520	http://www.ebi.ac.uk/QuickGO/GTerm?id=GO:0009266
4	4	response to topologically incorrect protein	GO:0035966	1.90×10-5	5.88×10-4	-1.03	-0.24	1.05743	-10.6873	ATP6V0D1|0.74;SERPINH1|0.72;HYOU1|0.69;SEC62|0.68;MYDGF|0.65;ERO1L|0.58	6	196	107	38520	http://www.ebi.ac.uk/QuickGO/GTerm?id=GO:0035966
4	4	response to wounding	GO:0009611	2.70×10-4	4.15×10-3	-1.92	-0.8	1.05743	-10.6873	BSG|0.73;ITGA5|0.73;HDAC2|0.73;KIF2A|0.71;C1QBP|0.7;CTSS|0.7;ATP1B1|0.69;PHB2|0.67;ITGB4|0.65;SLC7A5|0.63;CD44|0.47	11	1110	107	38520	http://www.ebi.ac.uk/QuickGO/GTerm?id=GO:0009611
4	4	RNA localization	GO:0006403	2.80×10-2	8.04×10-2	-0.23	0.26	1.05743	-10.6873	SRRM1|1.69;NUP210|0.69;PNPT1|0.69	3	235	107	38520	http://www.ebi.ac.uk/QuickGO/GTerm?id=GO:0006403
4	4	single-organism biosynthetic process	GO:0044711	1.63×10-7	1.71×10-5	-3.54	-1.81	1.05743	-10.6873	LPCAT1|0.74;SLC25A1|0.74;MRPL21|0.74;TECR|0.74;PDHA1|0.74;OAT|0.73;DLD|0.73;HDAC2|0.73;MRPL54|0.72;ATP5L|0.72;SERPINH1|0.72;GLS|0.72;TUFM|0.71;PTPMT1|0.71;NDUFA10|0.71;C1QBP|0.7;CSPG4|0.69;ERLIN1|0.69;MDH2|0.68;AURKAIP1|0.68;PDHB|0.67;SERINC1|0.62;HSD17B4|0.54	23	2413	107	38520	http://www.ebi.ac.uk/QuickGO/GTerm?id=GO:0044711
4	4	single-organism carbohydrate metabolic process	GO:0044723	1.52×10-3	1.42×10-2	-1.54	-0.56	1.05743	-10.6873	DDOST|0.74;SLC25A1|0.74;PDHA1|0.74;STT3A|0.73;MLEC|0.71;PTPMT1|0.71;MDH2|0.68;PDHB|0.67;PARP1|0.66;GANAB|0.64	10	1164	107	38520	http://www.ebi.ac.uk/QuickGO/GTerm?id=GO:0044723
4	4	single-organism catabolic process	GO:0044712	1.01×10-6	6.03×10-5	-3.13	-1.55	1.05743	-10.6873	MUT|0.74;PDHA1|0.74;DLD|0.73;GNS|0.73;ECH1|0.72;GLS|0.72;HM13|0.71;PTPMT1|0.71;CTSS|0.7;CSPG4|0.69;ERLIN1|0.69;ATP1B1|0.69;ETHE1|0.68;MCCC2|0.64;NCEH1|0.63;PCYOX1|0.61;HSD17B4|0.54;CD44|0.47	18	1699	107	38520	http://www.ebi.ac.uk/QuickGO/GTerm?id=GO:0044712
4	4	single-organism cellular localization	GO:1902580	1.73×10-2	5.94×10-2	-1.68	-0.65	1.05743	-10.6873	CLIP1|1.66;SRI|1.57;DDOST|0.74;BSG|0.73;NDUFA13|0.7;ATP1B1|0.69;DNAJA3|0.69;SEC62|0.68;PHB2|0.67;PARP1|0.66	10	1661	107	38520	http://www.ebi.ac.uk/QuickGO/GTerm?id=GO:1902580
4	4	small molecule metabolic process	GO:0044281	6.27×10-10	3.23×10-7	-5.62	-3.11	1.05743	-10.6873	PSMA1|1.74;LPCAT1|0.74;SLC25A1|0.74;TECR|0.74;MUT|0.74;PDHA1|0.74;OAT|0.73;BSG|0.73;DLD|0.73;GNS|0.73;ECH1|0.72;NARS2|0.72;ATP5L|0.72;GLS|0.72;PTPMT1|0.71;NDUFA10|0.71;NDUFA13|0.7;CARS2|0.7;CSPG4|0.69;NUP210|0.69;ERLIN1|0.69;ETHE1|0.68;MDH2|0.68;CS|0.68;PDHB|0.67;MCCC2|0.64;LARS2|0.64;SLC7A5|0.63;SERINC1|0.62;PCYOX1|0.61;ERO1L|0.58;HSD17B4|0.54;CD44|0.47	33	3670	107	38520	http://www.ebi.ac.uk/QuickGO/GTerm?id=GO:0044281
4	4	sperm capacitation	GO:0048240	4.62×10-2	1.05×10-1	0	0.4	1.05743	-10.6873	DLD|0.73	1	17	107	38520	http://www.ebi.ac.uk/QuickGO/GTerm?id=GO:0048240
4	4	suckling behavior	GO:0001967	4.35×10-2	1.01×10-1	0	0.4	1.05743	-10.6873	GLS|0.72	1	16	107	38520	http://www.ebi.ac.uk/QuickGO/GTerm?id=GO:0001967
4	4	sulfide oxidation	GO:0019418	1.38×10-2	5.13×10-2	0	0.4	1.05743	-10.6873	ETHE1|0.68	1	5	107	38520	http://www.ebi.ac.uk/QuickGO/GTerm?id=GO:0019418
4	4	sulfur compound metabolic process	GO:0006790	8.40×10-10	3.60×10-7	-2.23	-0.99	1.05743	-10.6873	SLC25A1|0.74;TECR|0.74;MUT|0.74;PDHA1|0.74;DLD|0.73;GNS|0.73;CSPG4|0.69;ETHE1|0.68;PDHB|0.67;MCCC2|0.64;PCYOX1|0.61;GSTK1|0.56;HSD17B4|0.54	13	476	107	38520	http://www.ebi.ac.uk/QuickGO/GTerm?id=GO:0006790
4	4	symbiosis, encompassing mutualism through parasitism	GO:0044403	6.59×10-5	1.47×10-3	-2.06	-0.88	1.05743	-10.6873	GTF2F1|1.8;PSMA1|1.74;ATP6V0D1|0.74;SMARCA4|0.74;ITGA5|0.73;C1QBP|0.7;CYBA|0.7;NUP210|0.69;TOP1|0.68;TOP2A|0.6;SSRP1|0.5	11	944	107	38520	http://www.ebi.ac.uk/QuickGO/GTerm?id=GO:0044403
4	4	system development	GO:0048731	7.82×10-5	1.70×10-3	-5.18	-2.84	1.05743	-10.6873	NDRG1|1.88;GIGYF2|1.72;STMN1|1.67;DBNL|1.6;SRI|1.57;S100A6|1.52;LPCAT1|0.74;ATP6V0D1|0.74;AIFM1|0.74;SMARCA4|0.74;BSG|0.73;ACP2|0.73;ALCAM|0.73;ITGA5|0.73;HDAC2|0.73;YBX3|0.72;SERPINH1|0.72;KIF2A|0.71;CSPG4|0.69;CDK1|0.69;DNAJA3|0.69;PHB2|0.67;PARP1|0.66;MYDGF|0.65;ITGB4|0.65;SLC7A5|0.63;TOP2A|0.6;HSD17B4|0.54;CD44|0.47	29	5022	107	38520	http://www.ebi.ac.uk/QuickGO/GTerm?id=GO:0048731
4	4	thioester metabolic process	GO:0035383	1.80×10-7	1.71×10-5	-0.97	-0.2	1.05743	-10.6873	SLC25A1|0.74;TECR|0.74;PDHA1|0.74;DLD|0.73;PDHB|0.67;HSD17B4|0.54	6	88	107	38520	http://www.ebi.ac.uk/QuickGO/GTerm?id=GO:0035383
4	4	tissue development	GO:0009888	8.59×10-4	9.99×10-3	-2.51	-1.16	1.05743	-10.6873	TAGLN2|1.51;LPCAT1|0.74;SMARCA4|0.74;BSG|0.73;ITGA5|0.73;HDAC2|0.73;YBX3|0.72;SERPINH1|0.72;CDK1|0.69;PHB2|0.67;ITGB4|0.65;GSTK1|0.56;HSD17B4|0.54;CD44|0.47	14	1916	107	38520	http://www.ebi.ac.uk/QuickGO/GTerm?id=GO:0009888
4	4	transport	GO:0006810	3.85×10-2	9.51×10-2	-5.58	-3.08	1.05743	-10.6873	SRRM1|1.69;CLIP1|1.66;DBNL|1.6;SRI|1.57;PPP1R12A|1.54;S100A6|1.52;DDOST|0.74;SFXN3|0.74;SLC25A1|0.74;ATP6V0D1|0.74;BSG|0.73;ATP5L|0.72;GLS|0.72;HM13|0.71;CYBA|0.7;LSG1|0.7;CTSS|0.7;NDUFA13|0.7;NUP210|0.69;ATP1B1|0.69;PNPT1|0.69;HYOU1|0.69;SEC62|0.68;PHB2|0.67;PARP1|0.66;SLC7A5|0.63;ASPH|0.63;SERINC1|0.62;GOLIM4|0.62;SLCO3A1|0.61;PCYOX1|0.61;ERO1L|0.58	32	8544	107	38520	http://www.ebi.ac.uk/QuickGO/GTerm?id=GO:0006810
4	4	tricarboxylic acid cycle	GO:0006099	3.19×10-7	2.65×10-5	-0.78	-0.08	1.05743	-10.6873	PDHA1|0.74;DLD|0.73;MDH2|0.68;CS|0.68;PDHB|0.67	5	51	107	38520	http://www.ebi.ac.uk/QuickGO/GTerm?id=GO:0006099
5	5	4-hydroxyproline metabolic process	GO:0019471	3.55×10-2	9.17×10-2	0	0.4	1.05743	-10.6873	ERO1L|0.58	1	13	107	38520	http://www.ebi.ac.uk/QuickGO/GTerm?id=GO:0019471
5	5	alpha-amino acid metabolic process	GO:1901605	1.92×10-4	3.26×10-3	-1.18	-0.34	1.05743	-10.6873	MUT|0.74;OAT|0.73;DLD|0.73;GLS|0.72;MCCC2|0.64;SERINC1|0.62;ERO1L|0.58	7	425	107	38520	http://www.ebi.ac.uk/QuickGO/GTerm?id=GO:1901605
5	5	amino acid activation	GO:0043038	1.26×10-2	4.90×10-2	-0.49	0.1	1.05743	-10.6873	NARS2|0.72;CARS2|0.7;LARS2|0.64	3	173	107	38520	http://www.ebi.ac.uk/QuickGO/GTerm?id=GO:0043038
5	5	aminoglycan metabolic process	GO:0006022	3.02×10-2	8.34×10-2	-0.63	0.01	1.05743	-10.6873	GNS|0.73;CSPG4|0.69;CD44|0.47	3	242	107	38520	http://www.ebi.ac.uk/QuickGO/GTerm?id=GO:0006022
5	5	antigen processing and presentation of exogenous peptide antigen	GO:0002478	5.45×10-3	2.96×10-2	-0.7	-0.03	1.05743	-10.6873	PSMA1|1.74;KIF2A|0.71;CYBA|0.7;CTSS|0.7	4	252	107	38520	http://www.ebi.ac.uk/QuickGO/GTerm?id=GO:0002478
5	5	antigen processing and presentation of peptide antigen via MHC class I	GO:0002474	1.57×10-2	5.71×10-2	-0.24	0.25	1.05743	-10.6873	PSMA1|1.74;CYBA|0.7;CTSS|0.7	3	188	107	38520	http://www.ebi.ac.uk/QuickGO/GTerm?id=GO:0002474
5	5	antigen processing and presentation of peptide antigen via MHC class II	GO:0002495	3.71×10-2	9.44×10-2	-0.3	0.21	1.05743	-10.6873	KIF2A|0.71;CTSS|0.7	2	109	107	38520	http://www.ebi.ac.uk/QuickGO/GTerm?id=GO:0002495
5	5	blood coagulation	GO:0007596	2.38×10-4	3.86×10-3	-1.4	-0.47	1.05743	-10.6873	BSG|0.73;ITGA5|0.73;HDAC2|0.73;KIF2A|0.71;C1QBP|0.7;ATP1B1|0.69;SLC7A5|0.63;CD44|0.47	8	586	107	38520	http://www.ebi.ac.uk/QuickGO/GTerm?id=GO:0007596
5	5	branched-chain amino acid metabolic process	GO:0009081	2.38×10-3	1.83×10-2	-0.33	0.2	1.05743	-10.6873	DLD|0.73;MCCC2|0.64	2	26	107	38520	http://www.ebi.ac.uk/QuickGO/GTerm?id=GO:0009081
5	5	carbohydrate derivative biosynthetic process	GO:1901137	4.85×10-2	1.08×10-1	-1.09	-0.28	1.05743	-10.6873	DDOST|0.74;STT3A|0.73;ATP5L|0.72;MLEC|0.71;CSPG4|0.69;PARP1|0.66;GANAB|0.64	7	1191	107	38520	http://www.ebi.ac.uk/QuickGO/GTerm?id=GO:1901137
5	5	carbohydrate derivative catabolic process	GO:1901136	3.41×10-2	8.99×10-2	-0.63	0.01	1.05743	-10.6873	GNS|0.73;CSPG4|0.69;CD44|0.47	3	254	107	38520	http://www.ebi.ac.uk/QuickGO/GTerm?id=GO:1901136
5	5	cell communication by electrical coupling	GO:0010644	4.58×10-5	1.14×10-3	-0.2	0.28	1.05743	-10.6873	SRI|1.57;ATP1B1|0.69;ASPH|0.63	3	25	107	38520	http://www.ebi.ac.uk/QuickGO/GTerm?id=GO:0010644
5	5	cell communication involved in cardiac conduction	GO:0086065	6.12×10-3	3.19×10-2	-0.03	0.38	1.05743	-10.6873	SRI|1.57;ATP1B1|0.69	2	42	107	38520	http://www.ebi.ac.uk/QuickGO/GTerm?id=GO:0086065
5	5	cell cycle arrest	GO:0007050	4.38×10-2	1.02×10-1	0.16	0.5	1.05743	-10.6873	CDKN2A|1.86;PSMA1|1.74;PNPT1|0.69	3	281	107	38520	http://www.ebi.ac.uk/QuickGO/GTerm?id=GO:0007050
5	5	cell cycle checkpoint	GO:0000075	3.00×10-4	4.46×10-3	-0.22	0.26	1.05743	-10.6873	NDRG1|1.88;PSMA1|1.74;GIGYF2|1.72;TRRAP|0.72;CDK1|0.69;TOP2A|0.6	6	324	107	38520	http://www.ebi.ac.uk/QuickGO/GTerm?id=GO:0000075
5	5	cell cycle phase transition	GO:0044770	9.56×10-4	1.06×10-2	0.47	0.69	1.05743	-10.6873	CDKN2A|1.86;PSMA1|1.74;GIGYF2|1.72;PPP1R12A|1.54;SMARCA4|0.74;CDK1|0.69;PHB2|0.67	7	557	107	38520	http://www.ebi.ac.uk/QuickGO/GTerm?id=GO:0044770
5	4,5	cell development	GO:0048468	1.61×10-2	5.78×10-2	-2.29	-1.03	1.05743	-10.6873	NDRG1|1.88;STMN1|1.67;DBNL|1.6;S100A6|1.52;SMARCA4|0.74;DLD|0.73;ALCAM|0.73;ITGA5|0.73;HDAC2|0.73;SERPINH1|0.72;C1QBP|0.7;CDK1|0.69;HSD17B4|0.54	13	2407	107	38520	http://www.ebi.ac.uk/QuickGO/GTerm?id=GO:0048468
5	5	cell differentiation	GO:0030154	4.05×10-4	5.72×10-3	-4.58	-2.46	1.05743	-10.6873	NDRG1|1.88;GIGYF2|1.72;STMN1|1.67;DBNL|1.6;S100A6|1.52;TAGLN2|1.51;AIFM1|0.74;SMARCA4|0.74;DLD|0.73;ALCAM|0.73;ITGA5|0.73;HDAC2|0.73;SERPINH1|0.72;KIF2A|0.71;C1QBP|0.7;CSPG4|0.69;CDK1|0.69;DNAJA3|0.69;PARP1|0.66;ITGB4|0.65;SLC7A5|0.63;TOP2A|0.6;ERO1L|0.58;GSTK1|0.56;HSD17B4|0.54	25	4435	107	38520	http://www.ebi.ac.uk/QuickGO/GTerm?id=GO:0030154
5	5	cell-matrix adhesion	GO:0007160	2.95×10-2	8.34×10-2	-0.27	0.23	1.05743	-10.6873	CDKN2A|1.86;ITGB4|0.65;CD44|0.47	3	240	107	38520	http://www.ebi.ac.uk/QuickGO/GTerm?id=GO:0007160
5	5	cellular amide metabolic process	GO:0043603	6.34×10-5	1.47×10-3	-2.49	-1.16	1.05743	-10.6873	GIGYF2|1.72;DDOST|0.74;MRPL21|0.74;DLD|0.73;MRPL54|0.72;NARS2|0.72;YBX3|0.72;TUFM|0.71;C1QBP|0.7;CARS2|0.7;ETHE1|0.68;AURKAIP1|0.68;MCCC2|0.64;LARS2|0.64;GSTK1|0.56	15	1679	107	38520	http://www.ebi.ac.uk/QuickGO/GTerm?id=GO:0043603
5	4,5	cellular component morphogenesis	GO:0032989	1.12×10-2	4.48×10-2	-1.79	-0.72	1.05743	-10.6873	STMN1|1.67;DBNL|1.6;S100A6|1.52;ATP6V0D1|0.74;ALCAM|0.73;ITGA5|0.73;HDAC2|0.73;C1QBP|0.7;CDK1|0.69;PNPT1|0.69;POLDIP2|0.68	11	1792	107	38520	http://www.ebi.ac.uk/QuickGO/GTerm?id=GO:0032989
5	4,5	cellular homeostasis	GO:0019725	6.84×10-3	3.44×10-2	-1.35	-0.44	1.05743	-10.6873	SRI|1.57;ATP6V0D1|0.74;AIFM1|0.74;DLD|0.73;CYBA|0.7;ATP1B1|0.69;ASPH|0.63;ERO1L|0.58	8	1000	107	38520	http://www.ebi.ac.uk/QuickGO/GTerm?id=GO:0019725
5	5	cellular lipid catabolic process	GO:0044242	1.97×10-2	6.46×10-2	-0.54	0.06	1.05743	-10.6873	MUT|0.74;ECH1|0.72;HSD17B4|0.54	3	205	107	38520	http://www.ebi.ac.uk/QuickGO/GTerm?id=GO:0044242
5	5	cellular macromolecule biosynthetic process	GO:0034645	4.02×10-3	2.54×10-2	-6.72	-3.79	1.05743	-10.6873	CDKN2A|1.86;GTF2F1|1.8;GIGYF2|1.72;SRRM1|1.69;S100A11|1.58;PPP1R12A|1.54;DDOST|0.74;MRPL21|0.74;SMARCA4|0.74;STT3A|0.73;HDAC2|0.73;SLTM|0.73;MRPL54|0.72;NARS2|0.72;YBX3|0.72;GLS|0.72;TRRAP|0.72;TUFM|0.71;MLEC|0.71;C1QBP|0.7;SMARCA5|0.7;NDUFA13|0.7;CARS2|0.7;CSPG4|0.69;ERLIN1|0.69;CDK1|0.69;DNAJA3|0.69;TOP1|0.68;AURKAIP1|0.68;PHB2|0.67;PARP1|0.66;MYDGF|0.65;GANAB|0.64;LARS2|0.64;ASPH|0.63;TOP2A|0.…	38	9143	107	38520	http://www.ebi.ac.uk/QuickGO/GTerm?id=GO:0034645
5	5	cellular macromolecule catabolic process	GO:0044265	1.46×10-2	5.38×10-2	-1.74	-0.69	1.05743	-10.6873	PSMA1|1.74;UBE2K|1.53;AIFM1|0.74;CTSS|0.7;ERLIN1|0.69;CDK1|0.69;PNPT1|0.69;USP39|0.69;CLPX|0.67;PCYOX1|0.61	10	1616	107	38520	http://www.ebi.ac.uk/QuickGO/GTerm?id=GO:0044265
5	4,5	cellular modified amino acid metabolic process	GO:0006575	2.29×10-4	3.77×10-3	-1.21	-0.35	1.05743	-10.6873	MUT|0.74;ETHE1|0.68;SERINC1|0.62;PCYOX1|0.61;ERO1L|0.58;GSTK1|0.56	6	308	107	38520	http://www.ebi.ac.uk/QuickGO/GTerm?id=GO:0006575
5	5	cellular nitrogen compound biosynthetic process	GO:0044271	1.18×10-2	4.68×10-2	-6.34	-3.55	1.05743	-10.6873	CDKN2A|1.86;GTF2F1|1.8;GIGYF2|1.72;SRRM1|1.69;PPP1R12A|1.54;DDOST|0.74;MRPL21|0.74;SMARCA4|0.74;HDAC2|0.73;SLTM|0.73;MRPL54|0.72;NARS2|0.72;ATP5L|0.72;YBX3|0.72;GLS|0.72;TRRAP|0.72;TUFM|0.71;NDUFA10|0.71;C1QBP|0.7;SMARCA5|0.7;NDUFA13|0.7;CARS2|0.7;NUP210|0.69;ERLIN1|0.69;CDK1|0.69;DNAJA3|0.69;AURKAIP1|0.68;PHB2|0.67;FUS|0.67;PARP1|0.66;MYDGF|0.65;LARS2|0.64;ASPH|0.63;TOP2A|0.6;EWSR1|0.53;SSRP1|0.5	36	9092	107	38520	http://www.ebi.ac.uk/QuickGO/GTerm?id=GO:0044271
5	5	cellular protein localization	GO:0034613	1.48×10-2	5.44×10-2	-2.19	-0.97	1.05743	-10.6873	CLIP1|1.66;SRI|1.57;DDOST|0.74;BSG|0.73;HM13|0.71;NDUFA13|0.7;CDK1|0.69;ATP1B1|0.69;DNAJA3|0.69;SEC62|0.68;PHB2|0.67;PARP1|0.66;ASPH|0.63	13	2380	107	38520	http://www.ebi.ac.uk/QuickGO/GTerm?id=GO:0034613
5	5	cellular protein metabolic process	GO:0044267	2.13×10-6	1.07×10-4	-8.11	-4.66	1.05743	-10.6873	CDKN2A|1.86;PSMA1|1.74;GIGYF2|1.72;SLK|1.69;DBNL|1.6;PPP1R12A|1.54;UBE2K|1.53;DDOST|0.74;MRPL21|0.74;ATP6V0D1|0.74;AIFM1|0.74;FKBP10|0.73;ITGA5|0.73;STT3A|0.73;HDAC2|0.73;MRPL54|0.72;NARS2|0.72;YBX3|0.72;SERPINH1|0.72;TRRAP|0.72;TUFM|0.71;MLEC|0.71;PTPMT1|0.71;C1QBP|0.7;CTSS|0.7;NDUFA13|0.7;CARS2|0.7;CSPG4|0.69;NUP210|0.69;ERLIN1|0.69;CDK1|0.69;DNAJA3|0.69;HYOU1|0.69;USP39|0.69;MDH2|0.68;AURKAIP1…	47	8998	107	38520	http://www.ebi.ac.uk/QuickGO/GTerm?id=GO:0044267
5	5	cellular response to acid chemical	GO:0071229	1.24×10-2	4.87×10-2	-0.45	0.12	1.05743	-10.6873	HDAC2|0.73;CYBA|0.7;NDUFA13|0.7	3	172	107	38520	http://www.ebi.ac.uk/QuickGO/GTerm?id=GO:0071229
5	5	cellular response to DNA damage stimulus	GO:0006974	1.23×10-3	1.24×10-2	-2.45	-1.13	1.05743	-10.6873	NDRG1|1.88;PSMA1|1.74;GIGYF2|1.72;TMEM109|1.61;TRRAP|0.72;SMARCA5|0.7;CDK1|0.69;PARP1|0.66;TOP2A|0.6;SSRP1|0.5;CD44|0.47	11	1334	107	38520	http://www.ebi.ac.uk/QuickGO/GTerm?id=GO:0006974
5	5	cellular response to heat	GO:0034605	3.59×10-2	9.18×10-2	-0.3	0.22	1.05743	-10.6873	HDAC2|0.73;NUP210|0.69	2	107	107	38520	http://www.ebi.ac.uk/QuickGO/GTerm?id=GO:0034605
5	5	cellular response to nitrogen compound	GO:1901699	3.58×10-2	9.18×10-2	-0.76	-0.07	1.05743	-10.6873	ATP6V0D1|0.74;HDAC2|0.73;CYBA|0.7;CDK1|0.69;PARP1|0.66	5	653	107	38520	http://www.ebi.ac.uk/QuickGO/GTerm?id=GO:1901699
5	5	cellular response to organic substance	GO:0071310	4.40×10-4	6.05×10-3	-3.11	-1.54	1.05743	-10.6873	SRI|1.57;ATP6V0D1|0.74;ITGA5|0.73;HDAC2|0.73;YBX3|0.72;CYBA|0.7;CTSS|0.7;NDUFA13|0.7;NUP210|0.69;CDK1|0.69;DNAJA3|0.69;PNPT1|0.69;HYOU1|0.69;SEC62|0.68;PARP1|0.66;MYDGF|0.65;ERO1L|0.58;CD44|0.47	18	2696	107	38520	http://www.ebi.ac.uk/QuickGO/GTerm?id=GO:0071310
5	5	cellular response to organonitrogen compound	GO:0071417	2.51×10-2	7.53×10-2	-0.76	-0.07	1.05743	-10.6873	ATP6V0D1|0.74;HDAC2|0.73;CYBA|0.7;CDK1|0.69;PARP1|0.66	5	593	107	38520	http://www.ebi.ac.uk/QuickGO/GTerm?id=GO:0071417
5	5	cellular response to oxidative stress	GO:0034599	3.05×10-2	8.39×10-2	-0.48	0.1	1.05743	-10.6873	HDAC2|0.73;PNPT1|0.69;PARP1|0.66	3	243	107	38520	http://www.ebi.ac.uk/QuickGO/GTerm?id=GO:0034599
5	5	cellular response to oxygen-containing compound	GO:1901701	6.61×10-3	3.38×10-2	-1.3	-0.41	1.05743	-10.6873	SRI|1.57;ATP6V0D1|0.74;HDAC2|0.73;CYBA|0.7;NDUFA13|0.7;CDK1|0.69;PARP1|0.66;MYDGF|0.65	8	994	107	38520	http://www.ebi.ac.uk/QuickGO/GTerm?id=GO:1901701
5	5	cellular response to sterol depletion	GO:0071501	4.62×10-2	1.05×10-1	0	0.4	1.05743	-10.6873	ERLIN1|0.69	1	17	107	38520	http://www.ebi.ac.uk/QuickGO/GTerm?id=GO:0071501
5	5	cellular senescence	GO:0090398	8.92×10-3	3.93×10-2	-0.11	0.33	1.05743	-10.6873	CDKN2A|1.86;PNPT1|0.69	2	51	107	38520	http://www.ebi.ac.uk/QuickGO/GTerm?id=GO:0090398
5	5	chemical homeostasis	GO:0048878	1.68×10-2	5.83×10-2	-1.34	-0.44	1.05743	-10.6873	SRI|1.57;SFXN3|0.74;LPCAT1|0.74;ATP6V0D1|0.74;CYBA|0.7;ATP1B1|0.69;ASPH|0.63;ERO1L|0.58	8	1174	107	38520	http://www.ebi.ac.uk/QuickGO/GTerm?id=GO:0048878
5	5	chondroitin sulfate catabolic process	GO:0030207	3.82×10-2	9.50×10-2	0	0.4	1.05743	-10.6873	CSPG4|0.69	1	14	107	38520	http://www.ebi.ac.uk/QuickGO/GTerm?id=GO:0030207
5	5	chromatin organization	GO:0006325	4.76×10-2	1.07×10-1	-1.3	-0.41	1.05743	-10.6873	CDKN2A|1.86;SMARCA4|0.74;HDAC2|0.73;TRRAP|0.72;SMARCA5|0.7;TOP1|0.68;SSRP1|0.5	7	1186	107	38520	http://www.ebi.ac.uk/QuickGO/GTerm?id=GO:0006325
5	5	chromosome organization	GO:0051276	7.01×10-3	3.50×10-2	-2.01	-0.85	1.05743	-10.6873	CDKN2A|1.86;AIFM1|0.74;SMARCA4|0.74;HDAC2|0.73;TRRAP|0.72;SMARCA5|0.7;TOP1|0.68;PHB2|0.67;PARP1|0.66;TOP2A|0.6;SSRP1|0.5	11	1678	107	38520	http://www.ebi.ac.uk/QuickGO/GTerm?id=GO:0051276
5	5	circulatory system process	GO:0003013	4.13×10-2	9.94×10-2	-0.71	-0.04	1.05743	-10.6873	SRI|1.57;CYBA|0.7;ATP1B1|0.69;ASPH|0.63	4	466	107	38520	http://www.ebi.ac.uk/QuickGO/GTerm?id=GO:0003013
5	5	coenzyme metabolic process	GO:0006732	1.27×10-4	2.49×10-3	-1.33	-0.43	1.05743	-10.6873	SLC25A1|0.74;TECR|0.74;PDHA1|0.74;DLD|0.73;MDH2|0.68;PDHB|0.67;MCCC2|0.64;HSD17B4|0.54	8	534	107	38520	http://www.ebi.ac.uk/QuickGO/GTerm?id=GO:0006732
5	5	cofactor biosynthetic process	GO:0051188	9.53×10-4	1.06×10-2	-0.7	-0.04	1.05743	-10.6873	SLC25A1|0.74;TECR|0.74;PDHA1|0.74;DLD|0.73;PDHB|0.67	5	269	107	38520	http://www.ebi.ac.uk/QuickGO/GTerm?id=GO:0051188
5	5	collagen biosynthetic process	GO:0032964	4.53×10-3	2.73×10-2	-0.28	0.23	1.05743	-10.6873	HDAC2|0.73;SERPINH1|0.72	2	36	107	38520	http://www.ebi.ac.uk/QuickGO/GTerm?id=GO:0032964
5	5	development of secondary female sexual characteristics	GO:0046543	2.47×10-2	7.44×10-2	0	0.4	1.05743	-10.6873	PHB2|0.67	1	9	107	38520	http://www.ebi.ac.uk/QuickGO/GTerm?id=GO:0046543
5	5	dihydrolipoamide metabolic process	GO:0051068	2.78×10-3	1.95×10-2	0	0.4	1.05743	-10.6873	DLD|0.73	1	1	107	38520	http://www.ebi.ac.uk/QuickGO/GTerm?id=GO:0051068
5	4,5	electron transport chain	GO:0022900	1.33×10-3	1.28×10-2	-0.58	0.04	1.05743	-10.6873	DLD|0.73;ATP5L|0.72;NDUFA10|0.71;NDUFA13|0.7	4	170	107	38520	http://www.ebi.ac.uk/QuickGO/GTerm?id=GO:0022900
5	4,5	embryo implantation	GO:0007566	8.92×10-3	3.93×10-2	-0.29	0.22	1.05743	-10.6873	BSG|0.73;C1QBP|0.7	2	51	107	38520	http://www.ebi.ac.uk/QuickGO/GTerm?id=GO:0007566
5	5	embryonic cleavage	GO:0040016	1.59×10-4	2.92×10-3	-0.39	0.16	1.05743	-10.6873	TOP1|0.68;TOP2A|0.6	2	7	107	38520	http://www.ebi.ac.uk/QuickGO/GTerm?id=GO:0040016
5	5	endoplasmic reticulum to cytosol transport	GO:1903513	6.36×10-4	7.90×10-3	-0.2	0.28	1.05743	-10.6873	SRI|1.57;HM13|0.71;ASPH|0.63	3	60	107	38520	http://www.ebi.ac.uk/QuickGO/GTerm?id=GO:1903513
5	5	endothelial cell proliferation	GO:0001935	4.03×10-2	9.87×10-2	-0.34	0.19	1.05743	-10.6873	CYBA|0.7;MYDGF|0.65	2	114	107	38520	http://www.ebi.ac.uk/QuickGO/GTerm?id=GO:0001935
5	4,5	energy derivation by oxidation of organic compounds	GO:0015980	5.83×10-6	2.38×10-4	-1.38	-0.46	1.05743	-10.6873	PDHA1|0.74;DLD|0.73;ATP5L|0.72;NDUFA10|0.71;NDUFA13|0.7;PNPT1|0.69;MDH2|0.68;CS|0.68;PDHB|0.67	9	460	107	38520	http://www.ebi.ac.uk/QuickGO/GTerm?id=GO:0015980
5	5	epithelium development	GO:0060429	1.66×10-2	5.79×10-2	-1.63	-0.62	1.05743	-10.6873	TAGLN2|1.51;ITGA5|0.73;HDAC2|0.73;CDK1|0.69;PHB2|0.67;GSTK1|0.56;HSD17B4|0.54;CD44|0.47	8	1172	107	38520	http://www.ebi.ac.uk/QuickGO/GTerm?id=GO:0060429
5	4,5	establishment of protein localization	GO:0045184	2.57×10-2	7.65×10-2	-2.32	-1.05	1.05743	-10.6873	CLIP1|1.66;SRI|1.57;DDOST|0.74;ATP6V0D1|0.74;BSG|0.73;HM13|0.71;LSG1|0.7;NDUFA13|0.7;NUP210|0.69;ATP1B1|0.69;SEC62|0.68;PHB2|0.67;PARP1|0.66;ASPH|0.63	14	2841	107	38520	http://www.ebi.ac.uk/QuickGO/GTerm?id=GO:0045184
5	4,5	establishment of RNA localization	GO:0051236	2.42×10-2	7.42×10-2	-0.23	0.26	1.05743	-10.6873	SRRM1|1.69;NUP210|0.69;PNPT1|0.69	3	222	107	38520	http://www.ebi.ac.uk/QuickGO/GTerm?id=GO:0051236
5	5	extracellular matrix organization	GO:0030198	1.86×10-4	3.25×10-3	-1.32	-0.42	1.05743	-10.6873	BSG|0.73;ITGA5|0.73;SERPINH1|0.72;CTSS|0.7;ITGB4|0.65;ERO1L|0.58;CD44|0.47	7	423	107	38520	http://www.ebi.ac.uk/QuickGO/GTerm?id=GO:0030198
5	5	fatty acid metabolic process	GO:0006631	3.87×10-5	1.01×10-3	-1.27	-0.39	1.05743	-10.6873	TECR|0.74;MUT|0.74;PDHA1|0.74;DLD|0.73;ECH1|0.72;ERLIN1|0.69;PDHB|0.67;HSD17B4|0.54	8	450	107	38520	http://www.ebi.ac.uk/QuickGO/GTerm?id=GO:0006631
5	5	gastrulation	GO:0007369	1.63×10-2	5.78×10-2	-0.46	0.11	1.05743	-10.6873	DLD|0.73;ITGA5|0.73;ITGB4|0.65	3	191	107	38520	http://www.ebi.ac.uk/QuickGO/GTerm?id=GO:0007369
5	5	gene expression	GO:0010467	6.27×10-5	1.47×10-3	-8.23	-4.74	1.05743	-10.6873	CDKN2A|1.86;GTF2F1|1.8;PSMA1|1.74;GIGYF2|1.72;SRRM1|1.69;PPP1R12A|1.54;DDOST|0.74;MRPL21|0.74;AIFM1|0.74;SMARCA4|0.74;HDAC2|0.73;SLTM|0.73;MRPL54|0.72;NARS2|0.72;YBX3|0.72;SERPINH1|0.72;DHX30|0.72;GLS|0.72;TRRAP|0.72;TUFM|0.71;C1QBP|0.7;SMARCA5|0.7;CTSS|0.7;NDUFA13|0.7;CARS2|0.7;NUP210|0.69;ERLIN1|0.69;CDK1|0.69;ATP1B1|0.69;DNAJA3|0.69;PNPT1|0.69;HNRNPR|0.69;USP39|0.69;TOP1|0.68;AURKAIP1|0.68;PHB…	46	9837	107	38520	http://www.ebi.ac.uk/QuickGO/GTerm?id=GO:0010467
5	5	glycerolipid biosynthetic process	GO:0045017	1.25×10-2	4.90×10-2	-0.54	0.06	1.05743	-10.6873	LPCAT1|0.74;SLC25A1|0.74;TECR|0.74;PTPMT1|0.71	4	321	107	38520	http://www.ebi.ac.uk/QuickGO/GTerm?id=GO:0045017
5	5	glycerolipid metabolic process	GO:0046486	1.72×10-2	5.93×10-2	-0.75	-0.07	1.05743	-10.6873	LPCAT1|0.74;SLC25A1|0.74;TECR|0.74;PTPMT1|0.71;SERINC1|0.62	5	537	107	38520	http://www.ebi.ac.uk/QuickGO/GTerm?id=GO:0046486
5	5	glycoprotein metabolic process	GO:0009100	6.54×10-3	3.35×10-2	-0.95	-0.19	1.05743	-10.6873	DDOST|0.74;STT3A|0.73;MLEC|0.71;CSPG4|0.69;PARP1|0.66;GANAB|0.64	6	597	107	38520	http://www.ebi.ac.uk/QuickGO/GTerm?id=GO:0009100
5	5	glycosylation	GO:0070085	1.13×10-2	4.50×10-2	-0.79	-0.09	1.05743	-10.6873	DDOST|0.74;STT3A|0.73;MLEC|0.71;PARP1|0.66;GANAB|0.64	5	482	107	38520	http://www.ebi.ac.uk/QuickGO/GTerm?id=GO:0070085
5	5	hair follicle placode formation	GO:0060789	2.20×10-2	6.88×10-2	0	0.4	1.05743	-10.6873	HDAC2|0.73	1	8	107	38520	http://www.ebi.ac.uk/QuickGO/GTerm?id=GO:0060789
5	5	hemostasis	GO:0007599	2.52×10-4	4.01×10-3	-1.4	-0.47	1.05743	-10.6873	BSG|0.73;ITGA5|0.73;HDAC2|0.73;KIF2A|0.71;C1QBP|0.7;ATP1B1|0.69;SLC7A5|0.63;CD44|0.47	8	591	107	38520	http://www.ebi.ac.uk/QuickGO/GTerm?id=GO:0007599
5	5	hyaluronan catabolic process	GO:0030214	4.35×10-2	1.01×10-1	0	0.4	1.05743	-10.6873	CD44|0.47	1	16	107	38520	http://www.ebi.ac.uk/QuickGO/GTerm?id=GO:0030214
5	5	hydrogen peroxide biosynthetic process	GO:0050665	3.01×10-2	8.34×10-2	0	0.4	1.05743	-10.6873	CYBA|0.7	1	11	107	38520	http://www.ebi.ac.uk/QuickGO/GTerm?id=GO:0050665
5	5	hydrogen sulfide metabolic process	GO:0070813	1.38×10-2	5.13×10-2	0	0.4	1.05743	-10.6873	ETHE1|0.68	1	5	107	38520	http://www.ebi.ac.uk/QuickGO/GTerm?id=GO:0070813
5	5	inflammatory response to wounding	GO:0090594	1.66×10-2	5.78×10-2	0	0.4	1.05743	-10.6873	CD44|0.47	1	6	107	38520	http://www.ebi.ac.uk/QuickGO/GTerm?id=GO:0090594
5	4,5	innate immune response	GO:0045087	4.43×10-2	1.03×10-1	-1.49	-0.53	1.05743	-10.6873	PSMA1|1.74;DDOST|0.74;C1QBP|0.7;CYBA|0.7;CTSS|0.7;CDK1|0.69;DNAJA3|0.69;CD44|0.47	8	1419	107	38520	http://www.ebi.ac.uk/QuickGO/GTerm?id=GO:0045087
5	5	inositol phosphate dephosphorylation	GO:0046855	3.82×10-2	9.50×10-2	0	0.4	1.05743	-10.6873	PTPMT1|0.71	1	14	107	38520	http://www.ebi.ac.uk/QuickGO/GTerm?id=GO:0046855
5	5	intracellular transport	GO:0046907	7.74×10-4	9.26×10-3	-3.14	-1.56	1.05743	-10.6873	SRRM1|1.69;CLIP1|1.66;SRI|1.57;PPP1R12A|1.54;DDOST|0.74;BSG|0.73;ATP5L|0.72;HM13|0.71;CYBA|0.7;LSG1|0.7;NDUFA13|0.7;ATP1B1|0.69;PNPT1|0.69;SEC62|0.68;PHB2|0.67;PARP1|0.66;ASPH|0.63;ERO1L|0.58	18	2829	107	38520	http://www.ebi.ac.uk/QuickGO/GTerm?id=GO:0046907
5	5	keratan sulfate catabolic process	GO:0042340	3.28×10-2	8.77×10-2	0	0.4	1.05743	-10.6873	GNS|0.73	1	12	107	38520	http://www.ebi.ac.uk/QuickGO/GTerm?id=GO:0042340
5	5	limb development	GO:0060173	1.26×10-2	4.90×10-2	-0.52	0.07	1.05743	-10.6873	HDAC2|0.73;ITGB4|0.65;ASPH|0.63	3	173	107	38520	http://www.ebi.ac.uk/QuickGO/GTerm?id=GO:0060173
5	5	lipid biosynthetic process	GO:0008610	7.16×10-3	3.55×10-2	-1.18	-0.33	1.05743	-10.6873	LPCAT1|0.74;SLC25A1|0.74;TECR|0.74;PTPMT1|0.71;ERLIN1|0.69;SERINC1|0.62;HSD17B4|0.54	7	802	107	38520	http://www.ebi.ac.uk/QuickGO/GTerm?id=GO:0008610
5	5	lipid catabolic process	GO:0016042	1.81×10-2	6.17×10-2	-0.74	-0.06	1.05743	-10.6873	MUT|0.74;ECH1|0.72;NCEH1|0.63;HSD17B4|0.54	4	359	107	38520	http://www.ebi.ac.uk/QuickGO/GTerm?id=GO:0016042
5	5	macromolecular complex assembly	GO:0065003	2.68×10-4	4.15×10-3	-2.87	-1.39	1.05743	-10.6873	CDKN2A|1.86;STMN1|1.67;CLIP1|1.66;DBNL|1.6;AIFM1|0.74;OAT|0.73;GLS|0.72;HM13|0.71;KIF2A|0.71;C1QBP|0.7;CYBA|0.7;SMARCA5|0.7;PNPT1|0.69;USP39|0.69;ACAD9|0.64;BMS1|0.54	16	2134	107	38520	http://www.ebi.ac.uk/QuickGO/GTerm?id=GO:0065003
5	5	macromolecular complex disassembly	GO:0032984	1.47×10-4	2.81×10-3	-1.14	-0.31	1.05743	-10.6873	STMN1|1.67;MRPL21|0.74;SMARCA4|0.74;MRPL54|0.72;KIF2A|0.71;AURKAIP1|0.68;ASPH|0.63	7	407	107	38520	http://www.ebi.ac.uk/QuickGO/GTerm?id=GO:0032984
5	5	macromolecule biosynthetic process	GO:0009059	8.94×10-4	1.02×10-2	-7.19	-4.09	1.05743	-10.6873	CDKN2A|1.86;GTF2F1|1.8;GIGYF2|1.72;SRRM1|1.69;S100A11|1.58;PPP1R12A|1.54;DDOST|0.74;MRPL21|0.74;SMARCA4|0.74;STT3A|0.73;HDAC2|0.73;SLTM|0.73;MRPL54|0.72;NARS2|0.72;YBX3|0.72;SERPINH1|0.72;GLS|0.72;TRRAP|0.72;TUFM|0.71;MLEC|0.71;C1QBP|0.7;SMARCA5|0.7;NDUFA13|0.7;CARS2|0.7;CSPG4|0.69;NUP210|0.69;ERLIN1|0.69;CDK1|0.69;DNAJA3|0.69;TOP1|0.68;AURKAIP1|0.68;PHB2|0.67;FUS|0.67;PARP1|0.66;MYDGF|0.65;GANAB…	41	9370	107	38520	http://www.ebi.ac.uk/QuickGO/GTerm?id=GO:0009059
5	5	macromolecule catabolic process	GO:0009057	8.18×10-5	1.75×10-3	-2.8	-1.35	1.05743	-10.6873	PSMA1|1.74;UBE2K|1.53;LPCAT1|0.74;AIFM1|0.74;GNS|0.73;HM13|0.71;CTSS|0.7;NDUFA13|0.7;CSPG4|0.69;ERLIN1|0.69;CDK1|0.69;PNPT1|0.69;USP39|0.69;CLPX|0.67;PCYOX1|0.61;CD44|0.47	16	1923	107	38520	http://www.ebi.ac.uk/QuickGO/GTerm?id=GO:0009057
5	5	macromolecule modification	GO:0043412	4.97×10-2	1.09×10-1	-4.74	-2.56	1.05743	-10.6873	CDKN2A|1.86;PSMA1|1.74;SLK|1.69;DBNL|1.6;PPP1R12A|1.54;UBE2K|1.53;DDOST|0.74;FKBP10|0.73;ITGA5|0.73;STT3A|0.73;HDAC2|0.73;TRRAP|0.72;MLEC|0.71;PTPMT1|0.71;CSPG4|0.69;NUP210|0.69;CDK1|0.69;DNAJA3|0.69;MDH2|0.68;PHB2|0.67;PARP1|0.66;MYDGF|0.65;GANAB|0.64;ASPH|0.63;ERO1L|0.58;CD44|0.47	26	6786	107	38520	http://www.ebi.ac.uk/QuickGO/GTerm?id=GO:0043412
5	5	mitochondrial respiratory chain complex I biogenesis	GO:0097031	1.14×10-3	1.16×10-2	-0.32	0.2	1.05743	-10.6873	AIFM1|0.74;ACAD9|0.64	2	18	107	38520	http://www.ebi.ac.uk/QuickGO/GTerm?id=GO:0097031
5	5	mitochondrion organization	GO:0007005	1.69×10-7	1.71×10-5	-2.23	-0.99	1.05743	-10.6873	MRPL21|0.74;AIFM1|0.74;MRPL54|0.72;TUFM|0.71;C1QBP|0.7;NDUFA13|0.7;ATP1B1|0.69;DNAJA3|0.69;PNPT1|0.69;POLDIP2|0.68;AURKAIP1|0.68;PHB2|0.67;PARP1|0.66;ACAD9|0.64	14	883	107	38520	http://www.ebi.ac.uk/QuickGO/GTerm?id=GO:0007005
5	5	mitotic cell cycle	GO:0000278	1.14×10-5	3.75×10-4	-1.6	-0.6	1.05743	-10.6873	CDKN2A|1.86;PSMA1|1.74;GIGYF2|1.72;SLK|1.69;STMN1|1.67;CLIP1|1.66;PPP1R12A|1.54;SMARCA4|0.74;TRRAP|0.72;KIF2A|0.71;NUP210|0.69;CDK1|0.69;AURKAIP1|0.68;PHB2|0.67;TOP2A|0.6	15	1446	107	38520	http://www.ebi.ac.uk/QuickGO/GTerm?id=GO:0000278
5	5	mitotic cell cycle process	GO:1903047	3.05×10-6	1.48×10-4	-2.68	-1.27	1.05743	-10.6873	CDKN2A|1.86;PSMA1|1.74;GIGYF2|1.72;STMN1|1.67;CLIP1|1.66;PPP1R12A|1.54;SMARCA4|0.74;TRRAP|0.72;KIF2A|0.71;NUP210|0.69;CDK1|0.69;AURKAIP1|0.68;PHB2|0.67;TOP2A|0.6	14	1128	107	38520	http://www.ebi.ac.uk/QuickGO/GTerm?id=GO:1903047
5	5	monosaccharide metabolic process	GO:0005996	3.01×10-2	8.34×10-2	-0.6	0.03	1.05743	-10.6873	SLC25A1|0.74;PDHA1|0.74;MDH2|0.68;PDHB|0.67	4	421	107	38520	http://www.ebi.ac.uk/QuickGO/GTerm?id=GO:0005996
5	5	multicellular organismal macromolecule metabolic process	GO:0044259	5.30×10-3	2.96×10-2	-0.43	0.13	1.05743	-10.6873	HDAC2|0.73;SERPINH1|0.72;CTSS|0.7	3	126	107	38520	http://www.ebi.ac.uk/QuickGO/GTerm?id=GO:0044259
5	5	muscle system process	GO:0003012	6.97×10-3	3.50×10-2	-0.85	-0.13	1.05743	-10.6873	SRI|1.57;HDAC2|0.73;CYBA|0.7;ATP1B1|0.69;ASPH|0.63	5	428	107	38520	http://www.ebi.ac.uk/QuickGO/GTerm?id=GO:0003012
5	5	negative regulation of binding	GO:0051100	4.42×10-2	1.03×10-1	-0.06	0.37	1.05743	-10.6873	SRI|1.57;HDAC2|0.73	2	120	107	38520	http://www.ebi.ac.uk/QuickGO/GTerm?id=GO:0051100
5	4,5	negative regulation of cell communication	GO:0010648	1.31×10-2	5.08×10-2	-1.65	-0.63	1.05743	-10.6873	PSMA1|1.74;SMARCA4|0.74;YBX3|0.72;C1QBP|0.7;NDUFA13|0.7;DNAJA3|0.69;HYOU1|0.69;PHB2|0.67;CD44|0.47	9	1352	107	38520	http://www.ebi.ac.uk/QuickGO/GTerm?id=GO:0010648
5	4,5	negative regulation of cell death	GO:0060548	2.45×10-5	7.08×10-4	-2.19	-0.97	1.05743	-10.6873	PSMA1|1.74;TMEM109|1.61;ITGA5|0.73;HDAC2|0.73;YBX3|0.72;NDUFA13|0.7;CDK1|0.69;DNAJA3|0.69;HYOU1|0.69;PHB2|0.67;MYDGF|0.65;CD44|0.47	12	1008	107	38520	http://www.ebi.ac.uk/QuickGO/GTerm?id=GO:0060548
5	4,5	negative regulation of cell proliferation	GO:0008285	1.06×10-2	4.46×10-2	-0.21	0.27	1.05743	-10.6873	NDRG1|1.88;CDKN2A|1.86;S100A11|1.58;DNAJA3|0.69;PHB2|0.67;ASPH|0.63	6	662	107	38520	http://www.ebi.ac.uk/QuickGO/GTerm?id=GO:0008285
5	5	negative regulation of cellular biosynthetic process	GO:0031327	2.33×10-4	3.82×10-3	-2.39	-1.09	1.05743	-10.6873	CDKN2A|1.86;GIGYF2|1.72;S100A11|1.58;LPCAT1|0.74;SMARCA4|0.74;HDAC2|0.73;YBX3|0.72;C1QBP|0.7;SMARCA5|0.7;NDUFA13|0.7;ERLIN1|0.69;DNAJA3|0.69;PHB2|0.67;PARP1|0.66	14	1680	107	38520	http://www.ebi.ac.uk/QuickGO/GTerm?id=GO:0031327
5	4,5	negative regulation of defense response to virus	GO:0050687	4.62×10-2	1.05×10-1	0	0.4	1.05743	-10.6873	C1QBP|0.7	1	17	107	38520	http://www.ebi.ac.uk/QuickGO/GTerm?id=GO:0050687
5	5	negative regulation of endoplasmic reticulum stress-induced intrinsic apoptotic signaling pathway	GO:1902236	4.62×10-2	1.05×10-1	0	0.4	1.05743	-10.6873	HYOU1|0.69	1	17	107	38520	http://www.ebi.ac.uk/QuickGO/GTerm?id=GO:1902236
5	5	negative regulation of glomerular filtration by angiotensin	GO:0003106	2.78×10-3	1.95×10-2	0	0.4	1.05743	-10.6873	CYBA|0.7	1	1	107	38520	http://www.ebi.ac.uk/QuickGO/GTerm?id=GO:0003106
5	3,5	negative regulation of homeostatic process	GO:0032845	9.43×10-4	1.06×10-2	-0.79	-0.09	1.05743	-10.6873	SRI|1.57;CYBA|0.7;ASPH|0.63;ERO1L|0.58	4	155	107	38520	http://www.ebi.ac.uk/QuickGO/GTerm?id=GO:0032845
5	5	negative regulation of lipid biosynthetic process	GO:0051055	7.31×10-3	3.61×10-2	-0.29	0.22	1.05743	-10.6873	LPCAT1|0.74;ERLIN1|0.69	2	46	107	38520	http://www.ebi.ac.uk/QuickGO/GTerm?id=GO:0051055
5	5	negative regulation of response to interferon-gamma	GO:0060331	1.38×10-2	5.13×10-2	0	0.4	1.05743	-10.6873	DNAJA3|0.69	1	5	107	38520	http://www.ebi.ac.uk/QuickGO/GTerm?id=GO:0060331
5	5	nervous system development	GO:0007399	9.55×10-3	4.12×10-2	-2.59	-1.22	1.05743	-10.6873	NDRG1|1.88;GIGYF2|1.72;STMN1|1.67;DBNL|1.6;S100A6|1.52;ATP6V0D1|0.74;AIFM1|0.74;SMARCA4|0.74;ALCAM|0.73;ITGA5|0.73;HDAC2|0.73;KIF2A|0.71;CSPG4|0.69;CDK1|0.69;SLC7A5|0.63	15	2767	107	38520	http://www.ebi.ac.uk/QuickGO/GTerm?id=GO:0007399
5	5	neutral lipid biosynthetic process	GO:0046460	1.13×10-3	1.16×10-2	-0.39	0.16	1.05743	-10.6873	LPCAT1|0.74;SLC25A1|0.74;TECR|0.74	3	73	107	38520	http://www.ebi.ac.uk/QuickGO/GTerm?id=GO:0046460
5	5	neutral lipid metabolic process	GO:0006638	9.18×10-3	4.00×10-2	-0.39	0.16	1.05743	-10.6873	LPCAT1|0.74;SLC25A1|0.74;TECR|0.74	3	154	107	38520	http://www.ebi.ac.uk/QuickGO/GTerm?id=GO:0006638
5	5	nitrogen compound transport	GO:0071705	3.00×10-2	8.34×10-2	-1.3	-0.41	1.05743	-10.6873	SRRM1|1.69;SRI|1.57;GLS|0.72;NUP210|0.69;PNPT1|0.69;SLC7A5|0.63;SERINC1|0.62	7	1071	107	38520	http://www.ebi.ac.uk/QuickGO/GTerm?id=GO:0071705
5	5	nucleoside metabolic process	GO:0009116	2.54×10-2	7.61×10-2	-0.75	-0.07	1.05743	-10.6873	PDHA1|0.74;DLD|0.73;ATP5L|0.72;NDUFA10|0.71;MCCC2|0.64	5	595	107	38520	http://www.ebi.ac.uk/QuickGO/GTerm?id=GO:0009116
5	5	odontogenesis	GO:0042476	5.07×10-3	2.94×10-2	-0.46	0.11	1.05743	-10.6873	BSG|0.73;HDAC2|0.73;ITGB4|0.65	3	124	107	38520	http://www.ebi.ac.uk/QuickGO/GTerm?id=GO:0042476
5	4,5	organ development	GO:0048513	1.12×10-2	4.49×10-2	-3.13	-1.55	1.05743	-10.6873	GIGYF2|1.72;STMN1|1.67;SRI|1.57;LPCAT1|0.74;ATP6V0D1|0.74;SMARCA4|0.74;BSG|0.73;HDAC2|0.73;YBX3|0.72;SERPINH1|0.72;DNAJA3|0.69;PHB2|0.67;PARP1|0.66;ITGB4|0.65;TOP2A|0.6;HSD17B4|0.54;CD44|0.47	17	3359	107	38520	http://www.ebi.ac.uk/QuickGO/GTerm?id=GO:0048513
5	5	organelle fission	GO:0048285	2.20×10-3	1.75×10-2	-1.41	-0.48	1.05743	-10.6873	CLIP1|1.66;PPP1R12A|1.54;SMARCA4|0.74;KIF2A|0.71;CDK1|0.69;AURKAIP1|0.68;PHB2|0.67;TOP2A|0.6	8	827	107	38520	http://www.ebi.ac.uk/QuickGO/GTerm?id=GO:0048285
5	5	organic acid biosynthetic process	GO:0016053	1.31×10-3	1.28×10-2	-1	-0.22	1.05743	-10.6873	TECR|0.74;OAT|0.73;GLS|0.72;CSPG4|0.69;ERLIN1|0.69;HSD17B4|0.54	6	430	107	38520	http://www.ebi.ac.uk/QuickGO/GTerm?id=GO:0016053
5	5	organic acid catabolic process	GO:0016054	7.09×10-7	4.56×10-5	-1.4	-0.47	1.05743	-10.6873	MUT|0.74;DLD|0.73;ECH1|0.72;GLS|0.72;ETHE1|0.68;MCCC2|0.64;PCYOX1|0.61;HSD17B4|0.54	8	260	107	38520	http://www.ebi.ac.uk/QuickGO/GTerm?id=GO:0016054
5	5	organic hydroxy compound biosynthetic process	GO:1901617	3.14×10-2	8.63×10-2	-0.56	0.05	1.05743	-10.6873	LPCAT1|0.74;ERLIN1|0.69;HSD17B4|0.54	3	246	107	38520	http://www.ebi.ac.uk/QuickGO/GTerm?id=GO:1901617
5	5	organic substance transport	GO:0071702	3.62×10-3	2.34×10-2	-3.6	-1.85	1.05743	-10.6873	SRRM1|1.69;CLIP1|1.66;SRI|1.57;DDOST|0.74;SLC25A1|0.74;ATP6V0D1|0.74;BSG|0.73;GLS|0.72;HM13|0.71;LSG1|0.7;NDUFA13|0.7;NUP210|0.69;ATP1B1|0.69;PNPT1|0.69;SEC62|0.68;PHB2|0.67;PARP1|0.66;SLC7A5|0.63;ASPH|0.63;SERINC1|0.62;SLCO3A1|0.61	21	4056	107	38520	http://www.ebi.ac.uk/QuickGO/GTerm?id=GO:0071702
5	5	organonitrogen compound biosynthetic process	GO:1901566	8.71×10-4	1.01×10-2	-2.46	-1.13	1.05743	-10.6873	GIGYF2|1.72;DDOST|0.74;LPCAT1|0.74;MRPL21|0.74;OAT|0.73;MRPL54|0.72;NARS2|0.72;ATP5L|0.72;YBX3|0.72;GLS|0.72;TUFM|0.71;C1QBP|0.7;CARS2|0.7;CSPG4|0.69;AURKAIP1|0.68;LARS2|0.64	16	2378	107	38520	http://www.ebi.ac.uk/QuickGO/GTerm?id=GO:1901566
5	5	organonitrogen compound catabolic process	GO:1901565	3.87×10-5	1.01×10-3	-1.48	-0.52	1.05743	-10.6873	DLD|0.73;GNS|0.73;GLS|0.72;CSPG4|0.69;ETHE1|0.68;MCCC2|0.64;PCYOX1|0.61;CD44|0.47	8	450	107	38520	http://www.ebi.ac.uk/QuickGO/GTerm?id=GO:1901565
5	5	oxoacid metabolic process	GO:0043436	6.42×10-12	5.85×10-9	-4.28	-2.27	1.05743	-10.6873	PSMA1|1.74;TECR|0.74;MUT|0.74;PDHA1|0.74;OAT|0.73;BSG|0.73;DLD|0.73;GNS|0.73;ECH1|0.72;NARS2|0.72;GLS|0.72;CARS2|0.7;CSPG4|0.69;ERLIN1|0.69;ETHE1|0.68;MDH2|0.68;CS|0.68;PDHB|0.67;MCCC2|0.64;LARS2|0.64;SLC7A5|0.63;SERINC1|0.62;PCYOX1|0.61;ERO1L|0.58;HSD17B4|0.54	25	1711	107	38520	http://www.ebi.ac.uk/QuickGO/GTerm?id=GO:0043436
5	5	peptide metabolic process	GO:0006518	1.90×10-4	3.25×10-3	-2.16	-0.95	1.05743	-10.6873	GIGYF2|1.72;DDOST|0.74;MRPL21|0.74;MRPL54|0.72;NARS2|0.72;YBX3|0.72;TUFM|0.71;C1QBP|0.7;CARS2|0.7;ETHE1|0.68;AURKAIP1|0.68;LARS2|0.64;GSTK1|0.56	13	1445	107	38520	http://www.ebi.ac.uk/QuickGO/GTerm?id=GO:0006518
5	5	peripheral nervous system development	GO:0007422	2.94×10-2	8.34×10-2	-0.11	0.33	1.05743	-10.6873	NDRG1|1.88;CDK1|0.69	2	96	107	38520	http://www.ebi.ac.uk/QuickGO/GTerm?id=GO:0007422
5	5	phagosome maturation	GO:0090382	1.10×10-2	4.47×10-2	-0.29	0.22	1.05743	-10.6873	ATP6V0D1|0.74;CYBA|0.7	2	57	107	38520	http://www.ebi.ac.uk/QuickGO/GTerm?id=GO:0090382
5	5	phosphate-containing compound metabolic process	GO:0006796	1.72×10-2	5.93×10-2	-4.19	-2.21	1.05743	-10.6873	CDKN2A|1.86;SLK|1.69;DBNL|1.6;PPP1R12A|1.54;LPCAT1|0.74;PDHA1|0.74;ACP2|0.73;DLD|0.73;ITGA5|0.73;HDAC2|0.73;ATP5L|0.72;TRRAP|0.72;PTPMT1|0.71;NDUFA10|0.71;CSPG4|0.69;CDK1|0.69;DNAJA3|0.69;TOP1|0.68;MDH2|0.68;PHB2|0.67;MYDGF|0.65;MCCC2|0.64;SERINC1|0.62;CD44|0.47	24	5563	107	38520	http://www.ebi.ac.uk/QuickGO/GTerm?id=GO:0006796
5	4,5	positive regulation of catabolic process	GO:0009896	3.25×10-3	2.18×10-2	-1.01	-0.23	1.05743	-10.6873	PSMA1|1.74;LPCAT1|0.74;NDUFA13|0.7;CDK1|0.69;ATP1B1|0.69;PNPT1|0.69	6	516	107	38520	http://www.ebi.ac.uk/QuickGO/GTerm?id=GO:0009896
5	4,5	positive regulation of catalytic activity	GO:0043085	8.17×10-3	3.76×10-2	-2.44	-1.12	1.05743	-10.6873	GTF2F1|1.8;PSMA1|1.74;SLK|1.69;DBNL|1.6;AIFM1|0.74;NDUFA13|0.7;CSPG4|0.69;CDK1|0.69;ATP1B1|0.69;DNAJA3|0.69;CLPX|0.67;ASPH|0.63;SERINC1|0.62	13	2205	107	38520	http://www.ebi.ac.uk/QuickGO/GTerm?id=GO:0043085
5	4,5	positive regulation of cell aging	GO:0090343	1.38×10-2	5.13×10-2	0	0.4	1.05743	-10.6873	CDKN2A|1.86	1	5	107	38520	http://www.ebi.ac.uk/QuickGO/GTerm?id=GO:0090343
5	4,5	positive regulation of cell communication	GO:0010647	1.47×10-4	2.81×10-3	-2.71	-1.29	1.05743	-10.6873	PSMA1|1.74;DBNL|1.6;SRI|1.57;SMARCA4|0.74;ITGA5|0.73;HDAC2|0.73;C1QBP|0.7;CYBA|0.7;CSPG4|0.69;CDK1|0.69;ATP1B1|0.69;PHB2|0.67;PARP1|0.66;MYDGF|0.65;CD44|0.47	15	1812	107	38520	http://www.ebi.ac.uk/QuickGO/GTerm?id=GO:0010647
5	4,5	positive regulation of cell death	GO:0010942	1.34×10-2	5.13×10-2	-1.09	-0.28	1.05743	-10.6873	CDKN2A|1.86;AIFM1|0.74;C1QBP|0.7;NDUFA13|0.7;DNAJA3|0.69;TOP2A|0.6	6	698	107	38520	http://www.ebi.ac.uk/QuickGO/GTerm?id=GO:0010942
5	5	positive regulation of cellular catabolic process	GO:0031331	3.99×10-2	9.83×10-2	-0.72	-0.05	1.05743	-10.6873	PSMA1|1.74;CDK1|0.69;ATP1B1|0.69;PNPT1|0.69	4	461	107	38520	http://www.ebi.ac.uk/QuickGO/GTerm?id=GO:0031331
5	4,5	positive regulation of defense response	GO:0031349	7.66×10-3	3.70×10-2	-0.87	-0.14	1.05743	-10.6873	PSMA1|1.74;C1QBP|0.7;CYBA|0.7;CTSS|0.7;CDK1|0.69	5	438	107	38520	http://www.ebi.ac.uk/QuickGO/GTerm?id=GO:0031349
5	5	positive regulation of ion transmembrane transport	GO:0034767	3.35×10-3	2.23×10-2	-0.52	0.08	1.05743	-10.6873	CTSS|0.7;ATP1B1|0.69;ASPH|0.63	3	107	107	38520	http://www.ebi.ac.uk/QuickGO/GTerm?id=GO:0034767
5	5	positive regulation of protein metabolic process	GO:0051247	4.03×10-7	2.96×10-5	-3.37	-1.71	1.05743	-10.6873	PSMA1|1.74;SLK|1.69;DBNL|1.6;LPCAT1|0.74;AIFM1|0.74;ITGA5|0.73;HDAC2|0.73;YBX3|0.72;C1QBP|0.7;NDUFA13|0.7;CSPG4|0.69;CDK1|0.69;DNAJA3|0.69;AURKAIP1|0.68;PHB2|0.67;CLPX|0.67;MYDGF|0.65;ASPH|0.63;CD44|0.47	19	1772	107	38520	http://www.ebi.ac.uk/QuickGO/GTerm?id=GO:0051247
5	5	positive regulation of viral life cycle	GO:1903902	1.66×10-4	2.95×10-3	-0.91	-0.17	1.05743	-10.6873	GTF2F1|1.8;SMARCA4|0.74;TOP2A|0.6;SSRP1|0.5	4	98	107	38520	http://www.ebi.ac.uk/QuickGO/GTerm?id=GO:1903902
5	5	programmed cell death	GO:0012501	1.39×10-7	1.62×10-5	-4.26	-2.26	1.05743	-10.6873	CDKN2A|1.86;PSMA1|1.74;SLK|1.69;TMEM109|1.61;DBNL|1.6;UBE2K|1.53;AIFM1|0.74;ACP2|0.73;ITGA5|0.73;HDAC2|0.73;SLTM|0.73;YBX3|0.72;C1QBP|0.7;NDUFA13|0.7;CDK1|0.69;DNAJA3|0.69;HYOU1|0.69;TOP1|0.68;PHB2|0.67;MYDGF|0.65;TOP2A|0.6;ERO1L|0.58;CD44|0.47	23	2391	107	38520	http://www.ebi.ac.uk/QuickGO/GTerm?id=GO:0012501
5	5	protein catabolic process	GO:0030163	1.79×10-3	1.53×10-2	-1.89	-0.78	1.05743	-10.6873	PSMA1|1.74;UBE2K|1.53;LPCAT1|0.74;HM13|0.71;CTSS|0.7;NDUFA13|0.7;ERLIN1|0.69;CDK1|0.69;USP39|0.69;CLPX|0.67;PCYOX1|0.61	11	1399	107	38520	http://www.ebi.ac.uk/QuickGO/GTerm?id=GO:0030163
5	5	protein complex subunit organization	GO:0071822	2.14×10-4	3.60×10-3	-2.93	-1.43	1.05743	-10.6873	STMN1|1.67;CLIP1|1.66;DBNL|1.6;MRPL21|0.74;AIFM1|0.74;SMARCA4|0.74;OAT|0.73;MRPL54|0.72;SERPINH1|0.72;GLS|0.72;HM13|0.71;KIF2A|0.71;CYBA|0.7;SMARCA5|0.7;PNPT1|0.69;AURKAIP1|0.68;ACAD9|0.64;ASPH|0.63	18	2540	107	38520	http://www.ebi.ac.uk/QuickGO/GTerm?id=GO:0071822
5	5	protein maturation	GO:0051604	1.41×10-5	4.48×10-4	-1.54	-0.56	1.05743	-10.6873	AIFM1|0.74;SERPINH1|0.72;C1QBP|0.7;CTSS|0.7;DNAJA3|0.69;PHB2|0.67;PARP1|0.66;ASPH|0.63;ERO1L|0.58	9	514	107	38520	http://www.ebi.ac.uk/QuickGO/GTerm?id=GO:0051604
5	5	protein modification process	GO:0036211	3.02×10-2	8.35×10-2	-4.74	-2.56	1.05743	-10.6873	CDKN2A|1.86;PSMA1|1.74;SLK|1.69;DBNL|1.6;PPP1R12A|1.54;UBE2K|1.53;DDOST|0.74;FKBP10|0.73;ITGA5|0.73;STT3A|0.73;HDAC2|0.73;TRRAP|0.72;MLEC|0.71;PTPMT1|0.71;CSPG4|0.69;NUP210|0.69;CDK1|0.69;DNAJA3|0.69;MDH2|0.68;PHB2|0.67;PARP1|0.66;MYDGF|0.65;GANAB|0.64;ASPH|0.63;ERO1L|0.58;CD44|0.47	26	6479	107	38520	http://www.ebi.ac.uk/QuickGO/GTerm?id=GO:0036211
5	5	protein stabilization	GO:0050821	4.41×10-3	2.68×10-2	-0.5	0.09	1.05743	-10.6873	ATP1B1|0.69;DNAJA3|0.69;PHB2|0.67	3	118	107	38520	http://www.ebi.ac.uk/QuickGO/GTerm?id=GO:0050821
5	5	proteolysis	GO:0006508	3.07×10-5	8.50×10-4	-4.01	-2.1	1.05743	-10.6873	PSMA1|1.74;SRI|1.57;UBE2K|1.53;AIFM1|0.74;DLD|0.73;HDAC2|0.73;SERPINH1|0.72;TRRAP|0.72;HM13|0.71;C1QBP|0.7;CTSS|0.7;NDUFA13|0.7;ERLIN1|0.69;CDK1|0.69;DNAJA3|0.69;USP39|0.69;AURKAIP1|0.68;PHB2|0.67;CLPX|0.67;PARP1|0.66;ASPH|0.63;PCYOX1|0.61;CD44|0.47	23	3295	107	38520	http://www.ebi.ac.uk/QuickGO/GTerm?id=GO:0006508
5	4,5	regulation of cell communication	GO:0010646	3.23×10-3	2.17×10-2	-3.53	-1.8	1.05743	-10.6873	PSMA1|1.74;DBNL|1.6;SRI|1.57;SMARCA4|0.74;ITGA5|0.73;HDAC2|0.73;YBX3|0.72;C1QBP|0.7;CYBA|0.7;NDUFA13|0.7;CSPG4|0.69;CDK1|0.69;ATP1B1|0.69;DNAJA3|0.69;HYOU1|0.69;PHB2|0.67;PARP1|0.66;MYDGF|0.65;ASPH|0.63;CD44|0.47	20	3746	107	38520	http://www.ebi.ac.uk/QuickGO/GTerm?id=GO:0010646
5	4,5	regulation of cell cycle	GO:0051726	1.13×10-4	2.29×10-3	-2.54	-1.19	1.05743	-10.6873	NDRG1|1.88;CDKN2A|1.86;PSMA1|1.74;GIGYF2|1.72;SLK|1.69;SMARCA4|0.74;HDAC2|0.73;TRRAP|0.72;CDK1|0.69;PNPT1|0.69;AURKAIP1|0.68;PHB2|0.67;TOP2A|0.6	13	1371	107	38520	http://www.ebi.ac.uk/QuickGO/GTerm?id=GO:0051726
5	5	regulation of cell cycle process	GO:0010564	2.07×10-3	1.70×10-2	-0.75	-0.07	1.05743	-10.6873	NDRG1|1.88;PSMA1|1.74;GIGYF2|1.72;SMARCA4|0.74;CDK1|0.69;AURKAIP1|0.68;PHB2|0.67	7	638	107	38520	http://www.ebi.ac.uk/QuickGO/GTerm?id=GO:0010564
5	4,5	regulation of cell death	GO:0010941	2.32×10-5	6.79×10-4	-3.2	-1.59	1.05743	-10.6873	CDKN2A|1.86;PSMA1|1.74;SLK|1.69;TMEM109|1.61;AIFM1|0.74;ITGA5|0.73;HDAC2|0.73;YBX3|0.72;C1QBP|0.7;NDUFA13|0.7;CDK1|0.69;DNAJA3|0.69;HYOU1|0.69;PHB2|0.67;MYDGF|0.65;TOP2A|0.6;CD44|0.47	17	1929	107	38520	http://www.ebi.ac.uk/QuickGO/GTerm?id=GO:0010941
5	5	regulation of cellular biosynthetic process	GO:0031326	2.27×10-2	7.05×10-2	-5.26	-2.89	1.05743	-10.6873	CDKN2A|1.86;GTF2F1|1.8;GIGYF2|1.72;S100A11|1.58;PPP1R12A|1.54;LPCAT1|0.74;PDHA1|0.74;SMARCA4|0.74;DLD|0.73;HDAC2|0.73;SLTM|0.73;YBX3|0.72;TRRAP|0.72;C1QBP|0.7;SMARCA5|0.7;NDUFA13|0.7;ERLIN1|0.69;CDK1|0.69;DNAJA3|0.69;PHB2|0.67;FUS|0.67;PDHB|0.67;PARP1|0.66;MYDGF|0.65;LARS2|0.64;ASPH|0.63;TOP2A|0.6;EWSR1|0.53;SSRP1|0.5	29	7250	107	38520	http://www.ebi.ac.uk/QuickGO/GTerm?id=GO:0031326
5	4,5	regulation of cellular metabolic process	GO:0031323	6.85×10-4	8.40×10-3	-7.84	-4.49	1.05743	-10.6873	CDKN2A|1.86;GTF2F1|1.8;PSMA1|1.74;GIGYF2|1.72;SLK|1.69;DBNL|1.6;S100A11|1.58;PPP1R12A|1.54;UBE2K|1.53;LPCAT1|0.74;AIFM1|0.74;PDHA1|0.74;SMARCA4|0.74;DLD|0.73;ITGA5|0.73;HDAC2|0.73;SLTM|0.73;YBX3|0.72;SERPINH1|0.72;TRRAP|0.72;C1QBP|0.7;CYBA|0.7;SMARCA5|0.7;NDUFA13|0.7;CSPG4|0.69;ERLIN1|0.69;CDK1|0.69;ATP1B1|0.69;DNAJA3|0.69;PNPT1|0.69;AURKAIP1|0.68;PHB2|0.67;CLPX|0.67;FUS|0.67;PDHB|0.67;PARP1|0.66…	43	9878	107	38520	http://www.ebi.ac.uk/QuickGO/GTerm?id=GO:0031323
5	4,5	regulation of cellular response to stress	GO:0080135	1.75×10-3	1.52×10-2	-1.59	-0.59	1.05743	-10.6873	CDKN2A|1.86;DBNL|1.6;YBX3|0.72;NUP210|0.69;ATP1B1|0.69;PNPT1|0.69;HYOU1|0.69;CD44|0.47	8	797	107	38520	http://www.ebi.ac.uk/QuickGO/GTerm?id=GO:0080135
5	5	regulation of cellular senescence	GO:2000772	2.20×10-3	1.75×10-2	-0.11	0.33	1.05743	-10.6873	CDKN2A|1.86;PNPT1|0.69	2	25	107	38520	http://www.ebi.ac.uk/QuickGO/GTerm?id=GO:2000772
5	5	regulation of cofactor metabolic process	GO:0051193	3.71×10-4	5.31×10-3	-0.44	0.13	1.05743	-10.6873	PDHA1|0.74;DLD|0.73;PDHB|0.67	3	50	107	38520	http://www.ebi.ac.uk/QuickGO/GTerm?id=GO:0051193
5	5	regulation of defense response	GO:0031347	2.00×10-3	1.64×10-2	-1.36	-0.45	1.05743	-10.6873	PSMA1|1.74;C1QBP|0.7;CYBA|0.7;CTSS|0.7;CDK1|0.69;ATP1B1|0.69;DNAJA3|0.69;PHB2|0.67	8	814	107	38520	http://www.ebi.ac.uk/QuickGO/GTerm?id=GO:0031347
5	4,5	regulation of defense response to bacterium	GO:1900424	1.66×10-2	5.78×10-2	0	0.4	1.05743	-10.6873	CYBA|0.7	1	6	107	38520	http://www.ebi.ac.uk/QuickGO/GTerm?id=GO:1900424
5	5	regulation of DNA binding	GO:0051101	1.93×10-3	1.61×10-2	-0.2	0.28	1.05743	-10.6873	SRI|1.57;HDAC2|0.73;PARP1|0.66	3	88	107	38520	http://www.ebi.ac.uk/QuickGO/GTerm?id=GO:0051101
5	5	regulation of epithelial cell proliferation	GO:0050678	4.77×10-2	1.07×10-1	-0.52	0.08	1.05743	-10.6873	CYBA|0.7;PHB2|0.67;MYDGF|0.65	3	291	107	38520	http://www.ebi.ac.uk/QuickGO/GTerm?id=GO:0050678
5	3,4,5	regulation of homeostatic process	GO:0032844	2.08×10-2	6.73×10-2	-0.79	-0.09	1.05743	-10.6873	SRI|1.57;CYBA|0.7;ASPH|0.63;ERO1L|0.58	4	375	107	38520	http://www.ebi.ac.uk/QuickGO/GTerm?id=GO:0032844
5	5	regulation of humoral immune response	GO:0002920	1.10×10-2	4.47×10-2	-0.33	0.2	1.05743	-10.6873	C1QBP|0.7;PHB2|0.67	2	57	107	38520	http://www.ebi.ac.uk/QuickGO/GTerm?id=GO:0002920
5	5	regulation of intracellular transport	GO:0032386	2.22×10-2	6.93×10-2	-0.38	0.16	1.05743	-10.6873	SRI|1.57;PPP1R12A|1.54;CYBA|0.7;PARP1|0.66;ASPH|0.63	5	574	107	38520	http://www.ebi.ac.uk/QuickGO/GTerm?id=GO:0032386
5	5	regulation of lipid metabolic process	GO:0019216	1.50×10-3	1.41×10-2	-0.73	-0.06	1.05743	-10.6873	LPCAT1|0.74;PDHA1|0.74;DLD|0.73;ERLIN1|0.69;PDHB|0.67	5	298	107	38520	http://www.ebi.ac.uk/QuickGO/GTerm?id=GO:0019216
5	4,5	regulation of macromolecule metabolic process	GO:0060255	3.05×10-3	2.09×10-2	-7.41	-4.23	1.05743	-10.6873	CDKN2A|1.86;GTF2F1|1.8;PSMA1|1.74;GIGYF2|1.72;SLK|1.69;DBNL|1.6;S100A11|1.58;PPP1R12A|1.54;UBE2K|1.53;LPCAT1|0.74;AIFM1|0.74;SMARCA4|0.74;ITGA5|0.73;HDAC2|0.73;SLTM|0.73;YBX3|0.72;SERPINH1|0.72;TRRAP|0.72;C1QBP|0.7;SMARCA5|0.7;NDUFA13|0.7;CSPG4|0.69;ERLIN1|0.69;CDK1|0.69;ATP1B1|0.69;DNAJA3|0.69;PNPT1|0.69;TOP1|0.68;AURKAIP1|0.68;PHB2|0.67;CLPX|0.67;FUS|0.67;PARP1|0.66;MYDGF|0.65;LARS2|0.64;ASPH|0…	40	9637	107	38520	http://www.ebi.ac.uk/QuickGO/GTerm?id=GO:0060255
5	5	regulation of mammary gland epithelial cell proliferation	GO:0033599	4.35×10-2	1.01×10-1	0	0.4	1.05743	-10.6873	PHB2|0.67	1	16	107	38520	http://www.ebi.ac.uk/QuickGO/GTerm?id=GO:0033599
5	5	regulation of protein catabolic process	GO:0042176	4.08×10-2	9.87×10-2	-0.43	0.14	1.05743	-10.6873	PSMA1|1.74;UBE2K|1.53;LPCAT1|0.74;NDUFA13|0.7;CDK1|0.69	5	677	107	38520	http://www.ebi.ac.uk/QuickGO/GTerm?id=GO:0042176
5	5	regulation of protein metabolic process	GO:0051246	7.57×10-6	2.78×10-4	-4.59	-2.46	1.05743	-10.6873	CDKN2A|1.86;PSMA1|1.74;GIGYF2|1.72;SLK|1.69;DBNL|1.6;PPP1R12A|1.54;UBE2K|1.53;LPCAT1|0.74;AIFM1|0.74;ITGA5|0.73;HDAC2|0.73;YBX3|0.72;SERPINH1|0.72;C1QBP|0.7;NDUFA13|0.7;CSPG4|0.69;CDK1|0.69;DNAJA3|0.69;AURKAIP1|0.68;PHB2|0.67;CLPX|0.67;MYDGF|0.65;LARS2|0.64;ASPH|0.63;CD44|0.47	25	3475	107	38520	http://www.ebi.ac.uk/QuickGO/GTerm?id=GO:0051246
5	5	regulation of respiratory system process	GO:0044065	4.35×10-2	1.01×10-1	0	0.4	1.05743	-10.6873	GLS|0.72	1	16	107	38520	http://www.ebi.ac.uk/QuickGO/GTerm?id=GO:0044065
5	5	regulation of response to osmotic stress	GO:0047484	1.93×10-2	6.37×10-2	0	0.4	1.05743	-10.6873	YBX3|0.72	1	7	107	38520	http://www.ebi.ac.uk/QuickGO/GTerm?id=GO:0047484
5	4,5	regulation of symbiosis, encompassing mutualism through parasitism	GO:0043903	3.60×10-3	2.34×10-2	-0.91	-0.17	1.05743	-10.6873	GTF2F1|1.8;SMARCA4|0.74;TOP2A|0.6;SSRP1|0.5	4	224	107	38520	http://www.ebi.ac.uk/QuickGO/GTerm?id=GO:0043903
5	5	regulation of transferase activity	GO:0051338	2.36×10-2	7.28×10-2	-0.25	0.25	1.05743	-10.6873	CDKN2A|1.86;PSMA1|1.74;SLK|1.69;DBNL|1.6;CSPG4|0.69;CDK1|0.69;DNAJA3|0.69;SERINC1|0.62	8	1252	107	38520	http://www.ebi.ac.uk/QuickGO/GTerm?id=GO:0051338
5	4,5	regulation of transporter activity	GO:0032409	4.87×10-3	2.86×10-2	-0.71	-0.04	1.05743	-10.6873	SRI|1.57;CTSS|0.7;ATP1B1|0.69;ASPH|0.63	4	244	107	38520	http://www.ebi.ac.uk/QuickGO/GTerm?id=GO:0032409
5	5	reproductive system development	GO:0061458	3.58×10-2	9.18×10-2	-0.87	-0.14	1.05743	-10.6873	BSG|0.73;YBX3|0.72;HSD17B4|0.54;CD44|0.47	4	445	107	38520	http://www.ebi.ac.uk/QuickGO/GTerm?id=GO:0061458
5	5	response to acidic pH	GO:0010447	4.88×10-2	1.08×10-1	0	0.4	1.05743	-10.6873	CTSS|0.7	1	18	107	38520	http://www.ebi.ac.uk/QuickGO/GTerm?id=GO:0010447
5	5	response to ammonium ion	GO:0060359	2.67×10-2	7.86×10-2	-0.32	0.2	1.05743	-10.6873	HDAC2|0.73;PARP1|0.66	2	91	107	38520	http://www.ebi.ac.uk/QuickGO/GTerm?id=GO:0060359
5	5	response to brefeldin A	GO:0031001	5.55×10-3	2.96×10-2	0	0.4	1.05743	-10.6873	MYDGF|0.65	1	2	107	38520	http://www.ebi.ac.uk/QuickGO/GTerm?id=GO:0031001
5	5	response to cocaine	GO:0042220	7.62×10-3	3.70×10-2	-0.32	0.2	1.05743	-10.6873	HDAC2|0.73;PARP1|0.66	2	47	107	38520	http://www.ebi.ac.uk/QuickGO/GTerm?id=GO:0042220
5	5	response to cytokine	GO:0034097	4.71×10-3	2.81×10-2	-1.39	-0.47	1.05743	-10.6873	DDOST|0.74;YBX3|0.72;CYBA|0.7;NDUFA13|0.7;NUP210|0.69;DNAJA3|0.69;PNPT1|0.69;CD44|0.47	8	938	107	38520	http://www.ebi.ac.uk/QuickGO/GTerm?id=GO:0034097
5	5	response to decreased oxygen levels	GO:0036293	4.30×10-2	1.01×10-1	-0.27	0.23	1.05743	-10.6873	NDRG1|1.88;ATP1B1|0.69;HYOU1|0.69	3	279	107	38520	http://www.ebi.ac.uk/QuickGO/GTerm?id=GO:0036293
5	5	response to endoplasmic reticulum stress	GO:0034976	3.64×10-7	2.75×10-5	-1.51	-0.54	1.05743	-10.6873	UBE2K|1.53;ATP6V0D1|0.74;AIFM1|0.74;HM13|0.71;ERLIN1|0.69;HYOU1|0.69;SEC62|0.68;MYDGF|0.65;ERO1L|0.58	9	328	107	38520	http://www.ebi.ac.uk/QuickGO/GTerm?id=GO:0034976
5	5	response to mercury ion	GO:0046689	3.55×10-2	9.17×10-2	0	0.4	1.05743	-10.6873	BSG|0.73	1	13	107	38520	http://www.ebi.ac.uk/QuickGO/GTerm?id=GO:0046689
5	5	response to metal ion	GO:0010038	9.61×10-3	4.12×10-2	-0.79	-0.09	1.05743	-10.6873	NDRG1|1.88;BSG|0.73;FUS|0.67;ASPH|0.63	4	297	107	38520	http://www.ebi.ac.uk/QuickGO/GTerm?id=GO:0010038
5	5	response to organic cyclic compound	GO:0014070	4.68×10-2	1.06×10-1	-1	-0.22	1.05743	-10.6873	BSG|0.73;HDAC2|0.73;CYBA|0.7;PARP1|0.66;MYDGF|0.65;ASPH|0.63	6	937	107	38520	http://www.ebi.ac.uk/QuickGO/GTerm?id=GO:0014070
5	3,5	response to other organism	GO:0051707	4.24×10-2	1.01×10-1	-1.09	-0.28	1.05743	-10.6873	GTF2F1|1.8;STMN1|1.67;HDAC2|0.73;C1QBP|0.7;CYBA|0.7;ATP1B1|0.69	6	914	107	38520	http://www.ebi.ac.uk/QuickGO/GTerm?id=GO:0051707
5	5	response to purine-containing compound	GO:0014074	1.18×10-2	4.68×10-2	-0.47	0.11	1.05743	-10.6873	BSG|0.73;HDAC2|0.73;ASPH|0.63	3	169	107	38520	http://www.ebi.ac.uk/QuickGO/GTerm?id=GO:0014074
5	5	response to reactive oxygen species	GO:0000302	2.04×10-2	6.64×10-2	-0.55	0.06	1.05743	-10.6873	HDAC2|0.73;PARP1|0.66;ERO1L|0.58	3	208	107	38520	http://www.ebi.ac.uk/QuickGO/GTerm?id=GO:0000302
5	5	response to retinoic acid	GO:0032526	3.77×10-2	9.50×10-2	-0.29	0.22	1.05743	-10.6873	HDAC2|0.73;NDUFA13|0.7	2	110	107	38520	http://www.ebi.ac.uk/QuickGO/GTerm?id=GO:0032526
5	5	response to thyroid hormone	GO:0097066	4.88×10-2	1.08×10-1	0	0.4	1.05743	-10.6873	CTSS|0.7	1	18	107	38520	http://www.ebi.ac.uk/QuickGO/GTerm?id=GO:0097066
5	5	response to unfolded protein	GO:0006986	1.41×10-5	4.48×10-4	-1.03	-0.24	1.05743	-10.6873	ATP6V0D1|0.74;SERPINH1|0.72;HYOU1|0.69;SEC62|0.68;MYDGF|0.65;ERO1L|0.58	6	186	107	38520	http://www.ebi.ac.uk/QuickGO/GTerm?id=GO:0006986
5	5	ribonucleoprotein complex assembly	GO:0022618	4.04×10-2	9.87×10-2	-0.58	0.04	1.05743	-10.6873	C1QBP|0.7;USP39|0.69;BMS1|0.54	3	272	107	38520	http://www.ebi.ac.uk/QuickGO/GTerm?id=GO:0022618
5	5	ribonucleoprotein complex subunit organization	GO:0071826	4.38×10-2	1.02×10-1	-0.58	0.04	1.05743	-10.6873	C1QBP|0.7;USP39|0.69;BMS1|0.54	3	281	107	38520	http://www.ebi.ac.uk/QuickGO/GTerm?id=GO:0071826
5	4,5	sequestering of metal ion	GO:0051238	2.68×10-4	4.15×10-3	-0.79	-0.09	1.05743	-10.6873	SRI|1.57;CYBA|0.7;ASPH|0.63;ERO1L|0.58	4	111	107	38520	http://www.ebi.ac.uk/QuickGO/GTerm?id=GO:0051238
5	4,5	Sertoli cell development	GO:0060009	4.62×10-2	1.05×10-1	0	0.4	1.05743	-10.6873	HSD17B4|0.54	1	17	107	38520	http://www.ebi.ac.uk/QuickGO/GTerm?id=GO:0060009
5	4,5	signal transduction	GO:0007165	2.85×10-4	4.30×10-3	-7.69	-4.4	1.05743	-10.6873	NDRG1|1.88;CDKN2A|1.86;PSMA1|1.74;GIGYF2|1.72;SLK|1.69;STMN1|1.67;CLIP1|1.66;TMEM109|1.61;DBNL|1.6;S100A11|1.58;SRI|1.57;PPP1R12A|1.54;UBE2K|1.53;S100A6|1.52;ATP6V0D1|0.74;AIFM1|0.74;SMARCA4|0.74;BSG|0.73;ALCAM|0.73;ITGA5|0.73;HDAC2|0.73;YBX3|0.72;KIF2A|0.71;C1QBP|0.7;CYBA|0.7;CTSS|0.7;NDUFA13|0.7;CSPG4|0.69;NUP210|0.69;ERLIN1|0.69;CDK1|0.69;ATP1B1|0.69;DNAJA3|0.69;HYOU1|0.69;SEC62|0.68;PHB2|0.67…	42	9195	107	38520	http://www.ebi.ac.uk/QuickGO/GTerm?id=GO:0007165
5	4,5	single-organism membrane organization	GO:0044802	2.82×10-3	1.97×10-2	-1.73	-0.68	1.05743	-10.6873	NDRG1|1.88;CLIP1|1.66;DDOST|0.74;BSG|0.73;NDUFA13|0.7;NUP210|0.69;CDK1|0.69;ATP1B1|0.69;DNAJA3|0.69;SEC62|0.68	10	1267	107	38520	http://www.ebi.ac.uk/QuickGO/GTerm?id=GO:0044802
5	4,5	single-organism organelle organization	GO:1902589	2.52×10-3	1.92×10-2	-3.58	-1.83	1.05743	-10.6873	STMN1|1.67;CLIP1|1.66;PPP1R12A|1.54;MRPL21|0.74;ATP6V0D1|0.74;AIFM1|0.74;SMARCA4|0.74;HDAC2|0.73;MRPL54|0.72;TRRAP|0.72;TUFM|0.71;KIF2A|0.71;C1QBP|0.7;NDUFA13|0.7;CDK1|0.69;ATP1B1|0.69;PNPT1|0.69;POLDIP2|0.68;AURKAIP1|0.68;PHB2|0.67;PARP1|0.66;TOP2A|0.6	22	4205	107	38520	http://www.ebi.ac.uk/QuickGO/GTerm?id=GO:1902589
5	4,5	single-organism transport	GO:0044765	3.24×10-2	8.77×10-2	-4.66	-2.51	1.05743	-10.6873	SRRM1|1.69;CLIP1|1.66;SRI|1.57;S100A6|1.52;DDOST|0.74;SFXN3|0.74;SLC25A1|0.74;ATP6V0D1|0.74;BSG|0.73;ATP5L|0.72;GLS|0.72;HM13|0.71;CYBA|0.7;CTSS|0.7;NDUFA13|0.7;NUP210|0.69;ATP1B1|0.69;PNPT1|0.69;SEC62|0.68;PHB2|0.67;PARP1|0.66;SLC7A5|0.63;ASPH|0.63;SERINC1|0.62;SLCO3A1|0.61;PCYOX1|0.61;ERO1L|0.58	27	6834	107	38520	http://www.ebi.ac.uk/QuickGO/GTerm?id=GO:0044765
5	5	small molecule biosynthetic process	GO:0044283	2.11×10-3	1.72×10-2	-1.13	-0.3	1.05743	-10.6873	LPCAT1|0.74;TECR|0.74;OAT|0.73;GLS|0.72;CSPG4|0.69;ERLIN1|0.69;HSD17B4|0.54	7	640	107	38520	http://www.ebi.ac.uk/QuickGO/GTerm?id=GO:0044283
5	5	small molecule catabolic process	GO:0044282	4.91×10-7	3.41×10-5	-1.55	-0.56	1.05743	-10.6873	MUT|0.74;DLD|0.73;ECH1|0.72;GLS|0.72;PTPMT1|0.71;ETHE1|0.68;MCCC2|0.64;PCYOX1|0.61;HSD17B4|0.54	9	340	107	38520	http://www.ebi.ac.uk/QuickGO/GTerm?id=GO:0044282
5	5	sulfide oxidation, using sulfide:quinone oxidoreductase	GO:0070221	1.38×10-2	5.13×10-2	0	0.4	1.05743	-10.6873	ETHE1|0.68	1	5	107	38520	http://www.ebi.ac.uk/QuickGO/GTerm?id=GO:0070221
5	5	sulfur amino acid metabolic process	GO:0000096	1.31×10-3	1.28×10-2	-0.51	0.08	1.05743	-10.6873	MUT|0.74;ETHE1|0.68;PCYOX1|0.61	3	77	107	38520	http://www.ebi.ac.uk/QuickGO/GTerm?id=GO:0000096
5	5	sulfur compound biosynthetic process	GO:0044272	6.58×10-5	1.47×10-3	-0.86	-0.14	1.05743	-10.6873	SLC25A1|0.74;TECR|0.74;PDHA1|0.74;DLD|0.73;CSPG4|0.69;PDHB|0.67	6	245	107	38520	http://www.ebi.ac.uk/QuickGO/GTerm?id=GO:0044272
5	5	sulfur compound catabolic process	GO:0044273	1.17×10-5	3.82×10-4	-0.68	-0.02	1.05743	-10.6873	GNS|0.73;CSPG4|0.69;ETHE1|0.68;PCYOX1|0.61	4	50	107	38520	http://www.ebi.ac.uk/QuickGO/GTerm?id=GO:0044273
5	5	thioester biosynthetic process	GO:0035384	1.18×10-7	1.60×10-5	-0.7	-0.04	1.05743	-10.6873	SLC25A1|0.74;TECR|0.74;PDHA1|0.74;DLD|0.73;PDHB|0.67	5	42	107	38520	http://www.ebi.ac.uk/QuickGO/GTerm?id=GO:0035384
5	5	tumor necrosis factor superfamily cytokine production	GO:0071706	3.23×10-2	8.77×10-2	-0.29	0.22	1.05743	-10.6873	HDAC2|0.73;CYBA|0.7	2	101	107	38520	http://www.ebi.ac.uk/QuickGO/GTerm?id=GO:0071706
5	4,5	viral process	GO:0016032	7.63×10-4	9.21×10-3	-1.77	-0.7	1.05743	-10.6873	GTF2F1|1.8;PSMA1|1.74;SMARCA4|0.74;ITGA5|0.73;C1QBP|0.7;NUP210|0.69;TOP1|0.68;TOP2A|0.6;SSRP1|0.5	9	875	107	38520	http://www.ebi.ac.uk/QuickGO/GTerm?id=GO:0016032
5	5	wound healing	GO:0042060	1.31×10-3	1.28×10-2	-1.4	-0.47	1.05743	-10.6873	BSG|0.73;ITGA5|0.73;HDAC2|0.73;KIF2A|0.71;C1QBP|0.7;ATP1B1|0.69;SLC7A5|0.63;CD44|0.47	8	761	107	38520	http://www.ebi.ac.uk/QuickGO/GTerm?id=GO:0042060
6	6	activation-induced cell death of T cells	GO:0006924	3.01×10-2	8.34×10-2	0	0.4	1.05743	-10.6873	DNAJA3|0.69	1	11	107	38520	http://www.ebi.ac.uk/QuickGO/GTerm?id=GO:0006924
6	5,6	acyl-CoA metabolic process	GO:0006637	1.80×10-7	1.71×10-5	-0.97	-0.2	1.05743	-10.6873	SLC25A1|0.74;TECR|0.74;PDHA1|0.74;DLD|0.73;PDHB|0.67;HSD17B4|0.54	6	88	107	38520	http://www.ebi.ac.uk/QuickGO/GTerm?id=GO:0006637
6	6	acylglycerol biosynthetic process	GO:0046463	1.13×10-3	1.16×10-2	-0.39	0.16	1.05743	-10.6873	LPCAT1|0.74;SLC25A1|0.74;TECR|0.74	3	73	107	38520	http://www.ebi.ac.uk/QuickGO/GTerm?id=GO:0046463
6	6	acylglycerol metabolic process	GO:0006639	9.02×10-3	3.95×10-2	-0.39	0.16	1.05743	-10.6873	LPCAT1|0.74;SLC25A1|0.74;TECR|0.74	3	153	107	38520	http://www.ebi.ac.uk/QuickGO/GTerm?id=GO:0006639
6	6	amide biosynthetic process	GO:0043604	1.70×10-3	1.51×10-2	-1.74	-0.69	1.05743	-10.6873	GIGYF2|1.72;DDOST|0.74;MRPL21|0.74;MRPL54|0.72;NARS2|0.72;YBX3|0.72;TUFM|0.71;C1QBP|0.7;CARS2|0.7;AURKAIP1|0.68;LARS2|0.64	11	1390	107	38520	http://www.ebi.ac.uk/QuickGO/GTerm?id=GO:0043604
6	6	amino acid transport	GO:0006865	3.68×10-2	9.38×10-2	-0.55	0.06	1.05743	-10.6873	GLS|0.72;SLC7A5|0.63;SERINC1|0.62	3	262	107	38520	http://www.ebi.ac.uk/QuickGO/GTerm?id=GO:0006865
6	6	aminoglycan catabolic process	GO:0006026	2.77×10-3	1.95×10-2	-0.63	0.01	1.05743	-10.6873	GNS|0.73;CSPG4|0.69;CD44|0.47	3	100	107	38520	http://www.ebi.ac.uk/QuickGO/GTerm?id=GO:0006026
6	6	antigen processing and presentation of exogenous peptide antigen via MHC class I	GO:0042590	7.94×10-3	3.76×10-2	-0.24	0.25	1.05743	-10.6873	PSMA1|1.74;CYBA|0.7;CTSS|0.7	3	146	107	38520	http://www.ebi.ac.uk/QuickGO/GTerm?id=GO:0042590
6	6	antigen processing and presentation of exogenous peptide antigen via MHC class II	GO:0019886	3.47×10-2	9.13×10-2	-0.3	0.21	1.05743	-10.6873	KIF2A|0.71;CTSS|0.7	2	105	107	38520	http://www.ebi.ac.uk/QuickGO/GTerm?id=GO:0019886
6	6	apoptotic process	GO:0006915	1.92×10-6	1.01×10-4	-3.96	-2.07	1.05743	-10.6873	CDKN2A|1.86;PSMA1|1.74;SLK|1.69;TMEM109|1.61;DBNL|1.6;UBE2K|1.53;AIFM1|0.74;ITGA5|0.73;HDAC2|0.73;SLTM|0.73;YBX3|0.72;C1QBP|0.7;NDUFA13|0.7;CDK1|0.69;DNAJA3|0.69;HYOU1|0.69;PHB2|0.67;MYDGF|0.65;TOP2A|0.6;ERO1L|0.58;CD44|0.47	21	2364	107	38520	http://www.ebi.ac.uk/QuickGO/GTerm?id=GO:0006915
6	6	autophagic cell death	GO:0048102	2.47×10-2	7.44×10-2	0	0.4	1.05743	-10.6873	ACP2|0.73	1	9	107	38520	http://www.ebi.ac.uk/QuickGO/GTerm?id=GO:0048102
6	6	basement membrane organization	GO:0071711	4.35×10-2	1.01×10-1	0	0.4	1.05743	-10.6873	CTSS|0.7	1	16	107	38520	http://www.ebi.ac.uk/QuickGO/GTerm?id=GO:0071711
6	5,6	behavioral response to cocaine	GO:0048148	4.88×10-2	1.08×10-1	0	0.4	1.05743	-10.6873	PARP1|0.66	1	18	107	38520	http://www.ebi.ac.uk/QuickGO/GTerm?id=GO:0048148
6	6	blood circulation	GO:0008015	4.07×10-2	9.87×10-2	-0.71	-0.04	1.05743	-10.6873	SRI|1.57;CYBA|0.7;ATP1B1|0.69;ASPH|0.63	4	464	107	38520	http://www.ebi.ac.uk/QuickGO/GTerm?id=GO:0008015
6	6	calcium ion transport from endoplasmic reticulum to cytosol	GO:1903514	3.59×10-3	2.34×10-2	0	0.41	1.05743	-10.6873	SRI|1.57;ASPH|0.63	2	32	107	38520	http://www.ebi.ac.uk/QuickGO/GTerm?id=GO:1903514
6	6	carboxylic acid biosynthetic process	GO:0046394	1.31×10-3	1.28×10-2	-1	-0.22	1.05743	-10.6873	TECR|0.74;OAT|0.73;GLS|0.72;CSPG4|0.69;ERLIN1|0.69;HSD17B4|0.54	6	430	107	38520	http://www.ebi.ac.uk/QuickGO/GTerm?id=GO:0046394
6	6	carboxylic acid catabolic process	GO:0046395	7.09×10-7	4.56×10-5	-1.4	-0.47	1.05743	-10.6873	MUT|0.74;DLD|0.73;ECH1|0.72;GLS|0.72;ETHE1|0.68;MCCC2|0.64;PCYOX1|0.61;HSD17B4|0.54	8	260	107	38520	http://www.ebi.ac.uk/QuickGO/GTerm?id=GO:0046395
6	6	carboxylic acid metabolic process	GO:0019752	7.99×10-12	5.85×10-9	-4.14	-2.18	1.05743	-10.6873	PSMA1|1.74;TECR|0.74;MUT|0.74;PDHA1|0.74;OAT|0.73;BSG|0.73;DLD|0.73;ECH1|0.72;NARS2|0.72;GLS|0.72;CARS2|0.7;CSPG4|0.69;ERLIN1|0.69;ETHE1|0.68;MDH2|0.68;CS|0.68;PDHB|0.67;MCCC2|0.64;LARS2|0.64;SLC7A5|0.63;SERINC1|0.62;PCYOX1|0.61;ERO1L|0.58;HSD17B4|0.54	24	1578	107	38520	http://www.ebi.ac.uk/QuickGO/GTerm?id=GO:0019752
6	6	cell communication by electrical coupling involved in cardiac conduction	GO:0086064	1.41×10-3	1.34×10-2	-0.03	0.38	1.05743	-10.6873	SRI|1.57;ATP1B1|0.69	2	20	107	38520	http://www.ebi.ac.uk/QuickGO/GTerm?id=GO:0086064
6	6	cell cycle G1/S phase transition	GO:0044843	1.34×10-4	2.59×10-3	-0.28	0.23	1.05743	-10.6873	CDKN2A|1.86;PSMA1|1.74;GIGYF2|1.72;SMARCA4|0.74;CDK1|0.69;PHB2|0.67	6	279	107	38520	http://www.ebi.ac.uk/QuickGO/GTerm?id=GO:0044843
6	5,6	cell morphogenesis	GO:0000902	4.55×10-2	1.05×10-1	-1.47	-0.51	1.05743	-10.6873	STMN1|1.67;DBNL|1.6;S100A6|1.52;ATP6V0D1|0.74;ALCAM|0.73;ITGA5|0.73;HDAC2|0.73;C1QBP|0.7;CDK1|0.69	9	1688	107	38520	http://www.ebi.ac.uk/QuickGO/GTerm?id=GO:0000902
6	5,6	cell morphogenesis involved in differentiation	GO:0000904	1.83×10-2	6.18×10-2	-1.13	-0.3	1.05743	-10.6873	STMN1|1.67;S100A6|1.52;ALCAM|0.73;ITGA5|0.73;HDAC2|0.73;C1QBP|0.7;CDK1|0.69	7	965	107	38520	http://www.ebi.ac.uk/QuickGO/GTerm?id=GO:0000904
6	5,6	cell part morphogenesis	GO:0032990	7.48×10-3	3.67×10-2	-1.5	-0.54	1.05743	-10.6873	STMN1|1.67;DBNL|1.6;S100A6|1.52;ATP6V0D1|0.74;ALCAM|0.73;ITGA5|0.73;CDK1|0.69;PNPT1|0.69;POLDIP2|0.68	9	1233	107	38520	http://www.ebi.ac.uk/QuickGO/GTerm?id=GO:0032990
6	4,5,6	cell redox homeostasis	GO:0045454	7.50×10-3	3.67×10-2	-0.5	0.09	1.05743	-10.6873	AIFM1|0.74;DLD|0.73;ERO1L|0.58	3	143	107	38520	http://www.ebi.ac.uk/QuickGO/GTerm?id=GO:0045454
6	5,6	cell-cell adhesion mediated by integrin	GO:0033631	4.09×10-2	9.87×10-2	0	0.4	1.05743	-10.6873	ITGA5|0.73	1	15	107	38520	http://www.ebi.ac.uk/QuickGO/GTerm?id=GO:0033631
6	6	cell-substrate junction assembly	GO:0007044	2.40×10-2	7.41×10-2	-0.32	0.2	1.05743	-10.6873	ITGA5|0.73;ITGB4|0.65	2	86	107	38520	http://www.ebi.ac.uk/QuickGO/GTerm?id=GO:0007044
6	5,6	cellular chemical homeostasis	GO:0055082	2.25×10-2	7.00×10-2	-1.08	-0.27	1.05743	-10.6873	SRI|1.57;ATP6V0D1|0.74;CYBA|0.7;ATP1B1|0.69;ASPH|0.63;ERO1L|0.58	6	785	107	38520	http://www.ebi.ac.uk/QuickGO/GTerm?id=GO:0055082
6	6	cellular hyperosmotic response	GO:0071474	1.66×10-2	5.78×10-2	0	0.4	1.05743	-10.6873	YBX3|0.72	1	6	107	38520	http://www.ebi.ac.uk/QuickGO/GTerm?id=GO:0071474
6	6	cellular macromolecular complex assembly	GO:0034622	1.14×10-2	4.53×10-2	-1.66	-0.64	1.05743	-10.6873	STMN1|1.67;CLIP1|1.66;AIFM1|0.74;C1QBP|0.7;CYBA|0.7;SMARCA5|0.7;USP39|0.69;ACAD9|0.64;BMS1|0.54	9	1320	107	38520	http://www.ebi.ac.uk/QuickGO/GTerm?id=GO:0034622
6	6	cellular protein catabolic process	GO:0044257	2.07×10-2	6.68×10-2	-1.45	-0.5	1.05743	-10.6873	PSMA1|1.74;UBE2K|1.53;CTSS|0.7;ERLIN1|0.69;CDK1|0.69;USP39|0.69;CLPX|0.67;PCYOX1|0.61	8	1221	107	38520	http://www.ebi.ac.uk/QuickGO/GTerm?id=GO:0044257
6	6	cellular protein modification process	GO:0006464	3.02×10-2	8.35×10-2	-4.74	-2.56	1.05743	-10.6873	CDKN2A|1.86;PSMA1|1.74;SLK|1.69;DBNL|1.6;PPP1R12A|1.54;UBE2K|1.53;DDOST|0.74;FKBP10|0.73;ITGA5|0.73;STT3A|0.73;HDAC2|0.73;TRRAP|0.72;MLEC|0.71;PTPMT1|0.71;CSPG4|0.69;NUP210|0.69;CDK1|0.69;DNAJA3|0.69;MDH2|0.68;PHB2|0.67;PARP1|0.66;MYDGF|0.65;GANAB|0.64;ASPH|0.63;ERO1L|0.58;CD44|0.47	26	6479	107	38520	http://www.ebi.ac.uk/QuickGO/GTerm?id=GO:0006464
6	5,6	cellular respiration	GO:0045333	4.62×10-8	6.99×10-6	-1.38	-0.46	1.05743	-10.6873	PDHA1|0.74;DLD|0.73;ATP5L|0.72;NDUFA10|0.71;NDUFA13|0.7;PNPT1|0.69;MDH2|0.68;CS|0.68;PDHB|0.67	9	257	107	38520	http://www.ebi.ac.uk/QuickGO/GTerm?id=GO:0045333
6	6	cellular response to antibiotic	GO:0071236	4.35×10-2	1.01×10-1	0	0.4	1.05743	-10.6873	MYDGF|0.65	1	16	107	38520	http://www.ebi.ac.uk/QuickGO/GTerm?id=GO:0071236
6	6	cellular response to carbohydrate stimulus	GO:0071322	4.22×10-2	1.01×10-1	-0.04	0.38	1.05743	-10.6873	SRI|1.57;CYBA|0.7	2	117	107	38520	http://www.ebi.ac.uk/QuickGO/GTerm?id=GO:0071322
6	6	cellular response to cytokine stimulus	GO:0071345	8.35×10-3	3.76×10-2	-1.26	-0.39	1.05743	-10.6873	YBX3|0.72;CYBA|0.7;NDUFA13|0.7;NUP210|0.69;DNAJA3|0.69;PNPT1|0.69;CD44|0.47	7	826	107	38520	http://www.ebi.ac.uk/QuickGO/GTerm?id=GO:0071345
6	6	cellular response to ionizing radiation	GO:0071479	1.14×10-2	4.54×10-2	-0.05	0.37	1.05743	-10.6873	TMEM109|1.61;CYBA|0.7	2	58	107	38520	http://www.ebi.ac.uk/QuickGO/GTerm?id=GO:0071479
6	6	cellular response to metal ion	GO:0071248	4.35×10-2	1.01×10-1	-0.37	0.17	1.05743	-10.6873	FUS|0.67;ASPH|0.63	2	119	107	38520	http://www.ebi.ac.uk/QuickGO/GTerm?id=GO:0071248
6	6	cellular response to reactive oxygen species	GO:0034614	4.55×10-2	1.05×10-1	-0.32	0.2	1.05743	-10.6873	HDAC2|0.73;PARP1|0.66	2	122	107	38520	http://www.ebi.ac.uk/QuickGO/GTerm?id=GO:0034614
6	6	cellular response to retinoic acid	GO:0071300	1.59×10-2	5.75×10-2	-0.29	0.22	1.05743	-10.6873	HDAC2|0.73;NDUFA13|0.7	2	69	107	38520	http://www.ebi.ac.uk/QuickGO/GTerm?id=GO:0071300
6	6	cellular response to thyroid hormone stimulus	GO:0097067	3.28×10-2	8.77×10-2	0	0.4	1.05743	-10.6873	CTSS|0.7	1	12	107	38520	http://www.ebi.ac.uk/QuickGO/GTerm?id=GO:0097067
6	5,6	cellular response to topologically incorrect protein	GO:0035967	7.79×10-5	1.70×10-3	-0.88	-0.15	1.05743	-10.6873	ATP6V0D1|0.74;HYOU1|0.69;SEC62|0.68;MYDGF|0.65;ERO1L|0.58	5	156	107	38520	http://www.ebi.ac.uk/QuickGO/GTerm?id=GO:0035967
6	6	chromatin assembly or disassembly	GO:0006333	2.17×10-2	6.88×10-2	-0.27	0.23	1.05743	-10.6873	CDKN2A|1.86;SMARCA4|0.74;SMARCA5|0.7	3	213	107	38520	http://www.ebi.ac.uk/QuickGO/GTerm?id=GO:0006333
6	6	chromatin modification	GO:0016568	2.38×10-2	7.36×10-2	-1.3	-0.41	1.05743	-10.6873	CDKN2A|1.86;SMARCA4|0.74;HDAC2|0.73;TRRAP|0.72;SMARCA5|0.7;TOP1|0.68;SSRP1|0.5	7	1020	107	38520	http://www.ebi.ac.uk/QuickGO/GTerm?id=GO:0016568
6	5,6	chromosome condensation	GO:0030261	8.58×10-3	3.83×10-2	-0.35	0.18	1.05743	-10.6873	AIFM1|0.74;TOP2A|0.6	2	50	107	38520	http://www.ebi.ac.uk/QuickGO/GTerm?id=GO:0030261
6	6	coenzyme biosynthetic process	GO:0009108	4.80×10-4	6.30×10-3	-0.7	-0.04	1.05743	-10.6873	SLC25A1|0.74;TECR|0.74;PDHA1|0.74;DLD|0.73;PDHB|0.67	5	231	107	38520	http://www.ebi.ac.uk/QuickGO/GTerm?id=GO:0009108
6	6	collagen metabolic process	GO:0032963	4.62×10-3	2.77×10-2	-0.43	0.13	1.05743	-10.6873	HDAC2|0.73;SERPINH1|0.72;CTSS|0.7	3	120	107	38520	http://www.ebi.ac.uk/QuickGO/GTerm?id=GO:0032963
6	6	cytoplasmic transport	GO:0016482	2.66×10-5	7.51×10-4	-2.48	-1.14	1.05743	-10.6873	SRRM1|1.69;SRI|1.57;PPP1R12A|1.54;DDOST|0.74;HM13|0.71;CYBA|0.7;LSG1|0.7;NDUFA13|0.7;PNPT1|0.69;SEC62|0.68;PHB2|0.67;PARP1|0.66;ASPH|0.63;ERO1L|0.58	14	1368	107	38520	http://www.ebi.ac.uk/QuickGO/GTerm?id=GO:0016482
6	6	DNA conformation change	GO:0071103	4.35×10-3	2.65×10-2	-0.94	-0.19	1.05743	-10.6873	CDKN2A|1.86;AIFM1|0.74;SMARCA5|0.7;TOP1|0.68;TOP2A|0.6	5	382	107	38520	http://www.ebi.ac.uk/QuickGO/GTerm?id=GO:0071103
6	6	DNA damage checkpoint	GO:0000077	1.73×10-2	5.93×10-2	0.16	0.5	1.05743	-10.6873	PSMA1|1.74;GIGYF2|1.72;CDK1|0.69	3	195	107	38520	http://www.ebi.ac.uk/QuickGO/GTerm?id=GO:0000077
6	6	DNA integrity checkpoint	GO:0031570	2.86×10-3	1.99×10-2	-0.09	0.34	1.05743	-10.6873	PSMA1|1.74;GIGYF2|1.72;CDK1|0.69;TOP2A|0.6	4	210	107	38520	http://www.ebi.ac.uk/QuickGO/GTerm?id=GO:0031570
6	5,6	DNA metabolic process	GO:0006259	1.96×10-2	6.46×10-2	-1.82	-0.73	1.05743	-10.6873	S100A11|1.58;AIFM1|0.74;TRRAP|0.72;SMARCA5|0.7;CDK1|0.69;DNAJA3|0.69;TOP1|0.68;PARP1|0.66;TOP2A|0.6;SSRP1|0.5	10	1695	107	38520	http://www.ebi.ac.uk/QuickGO/GTerm?id=GO:0006259
6	5,6	endoplasmic reticulum unfolded protein response	GO:0030968	5.51×10-5	1.34×10-3	-0.88	-0.15	1.05743	-10.6873	ATP6V0D1|0.74;HYOU1|0.69;SEC62|0.68;MYDGF|0.65;ERO1L|0.58	5	145	107	38520	http://www.ebi.ac.uk/QuickGO/GTerm?id=GO:0030968
6	6	epithelial cell differentiation	GO:0030855	2.86×10-2	8.18×10-2	-1	-0.22	1.05743	-10.6873	TAGLN2|1.51;HDAC2|0.73;CDK1|0.69;GSTK1|0.56;HSD17B4|0.54	5	614	107	38520	http://www.ebi.ac.uk/QuickGO/GTerm?id=GO:0030855
6	5,6	establishment of protein localization to membrane	GO:0090150	1.32×10-3	1.28×10-2	-0.97	-0.2	1.05743	-10.6873	CLIP1|1.66;DDOST|0.74;BSG|0.73;NDUFA13|0.7;ATP1B1|0.69;SEC62|0.68	6	431	107	38520	http://www.ebi.ac.uk/QuickGO/GTerm?id=GO:0090150
6	5,6	extracellular matrix disassembly	GO:0022617	5.90×10-3	3.12×10-2	-0.62	0.02	1.05743	-10.6873	BSG|0.73;CTSS|0.7;CD44|0.47	3	131	107	38520	http://www.ebi.ac.uk/QuickGO/GTerm?id=GO:0022617
6	6	fatty acid catabolic process	GO:0009062	2.19×10-3	1.75×10-2	-0.54	0.06	1.05743	-10.6873	MUT|0.74;ECH1|0.72;HSD17B4|0.54	3	92	107	38520	http://www.ebi.ac.uk/QuickGO/GTerm?id=GO:0009062
6	4,6	fungiform papilla development	GO:0061196	1.66×10-2	5.78×10-2	0	0.4	1.05743	-10.6873	HDAC2|0.73	1	6	107	38520	http://www.ebi.ac.uk/QuickGO/GTerm?id=GO:0061196
6	6	glial cell differentiation	GO:0010001	1.52×10-2	5.60×10-2	-0.27	0.23	1.05743	-10.6873	NDRG1|1.88;HDAC2|0.73;CDK1|0.69	3	186	107	38520	http://www.ebi.ac.uk/QuickGO/GTerm?id=GO:0010001
6	5,6	glutathione metabolic process	GO:0006749	2.30×10-2	7.13×10-2	-0.42	0.14	1.05743	-10.6873	ETHE1|0.68;GSTK1|0.56	2	84	107	38520	http://www.ebi.ac.uk/QuickGO/GTerm?id=GO:0006749
6	6	glycoprotein biosynthetic process	GO:0009101	4.16×10-3	2.58×10-2	-0.95	-0.19	1.05743	-10.6873	DDOST|0.74;STT3A|0.73;MLEC|0.71;CSPG4|0.69;PARP1|0.66;GANAB|0.64	6	543	107	38520	http://www.ebi.ac.uk/QuickGO/GTerm?id=GO:0009101
6	6	glycosaminoglycan metabolic process	GO:0030203	1.99×10-2	6.53×10-2	-0.63	0.01	1.05743	-10.6873	GNS|0.73;CSPG4|0.69;CD44|0.47	3	206	107	38520	http://www.ebi.ac.uk/QuickGO/GTerm?id=GO:0030203
6	6	heart process	GO:0003015	2.02×10-2	6.58×10-2	-0.2	0.28	1.05743	-10.6873	SRI|1.57;ATP1B1|0.69;ASPH|0.63	3	207	107	38520	http://www.ebi.ac.uk/QuickGO/GTerm?id=GO:0003015
6	5,6	heterotypic cell-cell adhesion	GO:0034113	8.26×10-3	3.76×10-2	-0.46	0.11	1.05743	-10.6873	ITGA5|0.73;CD44|0.47	2	49	107	38520	http://www.ebi.ac.uk/QuickGO/GTerm?id=GO:0034113
6	6	hexose metabolic process	GO:0019318	1.60×10-2	5.78×10-2	-0.6	0.03	1.05743	-10.6873	SLC25A1|0.74;PDHA1|0.74;MDH2|0.68;PDHB|0.67	4	346	107	38520	http://www.ebi.ac.uk/QuickGO/GTerm?id=GO:0019318
6	6	histone H4 deacetylation	GO:0070933	2.74×10-2	7.92×10-2	0	0.4	1.05743	-10.6873	HDAC2|0.73	1	10	107	38520	http://www.ebi.ac.uk/QuickGO/GTerm?id=GO:0070933
6	5,6	homocysteine metabolic process	GO:0050667	3.28×10-2	8.77×10-2	0	0.4	1.05743	-10.6873	MUT|0.74	1	12	107	38520	http://www.ebi.ac.uk/QuickGO/GTerm?id=GO:0050667
6	4,6	immune response-activating signal transduction	GO:0002757	4.02×10-2	9.87×10-2	-0.87	-0.14	1.05743	-10.6873	PSMA1|1.74;C1QBP|0.7;CYBA|0.7;CTSS|0.7;CDK1|0.69	5	674	107	38520	http://www.ebi.ac.uk/QuickGO/GTerm?id=GO:0002757
6	5,6	import across plasma membrane	GO:0098739	3.01×10-2	8.34×10-2	0	0.4	1.05743	-10.6873	ATP1B1|0.69	1	11	107	38520	http://www.ebi.ac.uk/QuickGO/GTerm?id=GO:0098739
6	5,6	intracellular sequestering of iron ion	GO:0006880	5.55×10-3	2.96×10-2	0	0.4	1.05743	-10.6873	SRI|1.57	1	2	107	38520	http://www.ebi.ac.uk/QuickGO/GTerm?id=GO:0006880
6	5,6	intracellular signal transduction	GO:0035556	1.02×10-5	3.45×10-4	-5.19	-2.84	1.05743	-10.6873	NDRG1|1.88;CDKN2A|1.86;PSMA1|1.74;SLK|1.69;STMN1|1.67;CLIP1|1.66;TMEM109|1.61;DBNL|1.6;PPP1R12A|1.54;UBE2K|1.53;AIFM1|0.74;HDAC2|0.73;YBX3|0.72;KIF2A|0.71;C1QBP|0.7;CYBA|0.7;NDUFA13|0.7;CSPG4|0.69;CDK1|0.69;ATP1B1|0.69;DNAJA3|0.69;HYOU1|0.69;PHB2|0.67;MYDGF|0.65;ASPH|0.63;ERO1L|0.58;CD44|0.47	27	4012	107	38520	http://www.ebi.ac.uk/QuickGO/GTerm?id=GO:0035556
6	6	intrinsic apoptotic signaling pathway in response to osmotic stress	GO:0008627	1.38×10-2	5.13×10-2	0	0.4	1.05743	-10.6873	YBX3|0.72	1	5	107	38520	http://www.ebi.ac.uk/QuickGO/GTerm?id=GO:0008627
6	6	ion homeostasis	GO:0050801	7.64×10-3	3.70×10-2	-1.21	-0.35	1.05743	-10.6873	SRI|1.57;SFXN3|0.74;ATP6V0D1|0.74;CYBA|0.7;ATP1B1|0.69;ASPH|0.63;ERO1L|0.58	7	812	107	38520	http://www.ebi.ac.uk/QuickGO/GTerm?id=GO:0050801
6	5,6	ion transport	GO:0006811	9.11×10-3	3.98×10-2	-2.8	-1.35	1.05743	-10.6873	SRI|1.57;S100A6|1.52;SFXN3|0.74;SLC25A1|0.74;ATP6V0D1|0.74;ATP5L|0.72;GLS|0.72;CYBA|0.7;CTSS|0.7;ATP1B1|0.69;SLC7A5|0.63;ASPH|0.63;SERINC1|0.62;SLCO3A1|0.61;PCYOX1|0.61;ERO1L|0.58	16	3017	107	38520	http://www.ebi.ac.uk/QuickGO/GTerm?id=GO:0006811
6	6	karyogamy	GO:0000741	2.78×10-3	1.95×10-2	0	0.4	1.05743	-10.6873	CDK1|0.69	1	1	107	38520	http://www.ebi.ac.uk/QuickGO/GTerm?id=GO:0000741
6	6	leucine metabolic process	GO:0006551	1.66×10-2	5.78×10-2	0	0.4	1.05743	-10.6873	MCCC2|0.64	1	6	107	38520	http://www.ebi.ac.uk/QuickGO/GTerm?id=GO:0006551
6	5,6	lipid oxidation	GO:0034440	2.32×10-3	1.80×10-2	-0.54	0.06	1.05743	-10.6873	MUT|0.74;ECH1|0.72;HSD17B4|0.54	3	94	107	38520	http://www.ebi.ac.uk/QuickGO/GTerm?id=GO:0034440
6	5,6	lipoate metabolic process	GO:0009106	1.11×10-2	4.47×10-2	0	0.4	1.05743	-10.6873	DLD|0.73	1	4	107	38520	http://www.ebi.ac.uk/QuickGO/GTerm?id=GO:0009106
6	6	macromolecule glycosylation	GO:0043413	9.18×10-3	4.00×10-2	-0.79	-0.09	1.05743	-10.6873	DDOST|0.74;STT3A|0.73;MLEC|0.71;PARP1|0.66;GANAB|0.64	5	458	107	38520	http://www.ebi.ac.uk/QuickGO/GTerm?id=GO:0043413
6	5,6	membrane disassembly	GO:0030397	6.70×10-3	3.39×10-2	-0.32	0.2	1.05743	-10.6873	NUP210|0.69;CDK1|0.69	2	44	107	38520	http://www.ebi.ac.uk/QuickGO/GTerm?id=GO:0030397
6	6	membrane repolarization during action potential	GO:0086011	3.55×10-2	9.17×10-2	0	0.4	1.05743	-10.6873	ATP1B1|0.69	1	13	107	38520	http://www.ebi.ac.uk/QuickGO/GTerm?id=GO:0086011
6	6	MHC class II biosynthetic process	GO:0045342	4.09×10-2	9.87×10-2	0	0.4	1.05743	-10.6873	HDAC2|0.73	1	15	107	38520	http://www.ebi.ac.uk/QuickGO/GTerm?id=GO:0045342
6	6	mitochondrial genome maintenance	GO:0000002	4.28×10-3	2.62×10-2	-0.34	0.19	1.05743	-10.6873	DNAJA3|0.69;PARP1|0.66	2	35	107	38520	http://www.ebi.ac.uk/QuickGO/GTerm?id=GO:0000002
6	4,5,6	mitochondrial RNA processing	GO:0000963	1.66×10-2	5.78×10-2	0	0.4	1.05743	-10.6873	PNPT1|0.69	1	6	107	38520	http://www.ebi.ac.uk/QuickGO/GTerm?id=GO:0000963
6	5,6	mitochondrial translation	GO:0032543	3.78×10-5	1.01×10-3	-0.74	-0.06	1.05743	-10.6873	MRPL21|0.74;MRPL54|0.72;TUFM|0.71;C1QBP|0.7;AURKAIP1|0.68	5	134	107	38520	http://www.ebi.ac.uk/QuickGO/GTerm?id=GO:0032543
6	5,6	mitochondrion morphogenesis	GO:0070584	1.41×10-3	1.34×10-2	-0.33	0.2	1.05743	-10.6873	PNPT1|0.69;POLDIP2|0.68	2	20	107	38520	http://www.ebi.ac.uk/QuickGO/GTerm?id=GO:0070584
6	6	mitotic cell cycle arrest	GO:0071850	3.82×10-2	9.50×10-2	0	0.4	1.05743	-10.6873	PNPT1|0.69	1	14	107	38520	http://www.ebi.ac.uk/QuickGO/GTerm?id=GO:0071850
6	6	mitotic cell cycle checkpoint	GO:0007093	5.09×10-4	6.55×10-3	-0.48	0.1	1.05743	-10.6873	PSMA1|1.74;GIGYF2|1.72;TRRAP|0.72;CDK1|0.69;TOP2A|0.6	5	234	107	38520	http://www.ebi.ac.uk/QuickGO/GTerm?id=GO:0007093
6	6	mitotic cell cycle phase transition	GO:0044772	7.73×10-4	9.26×10-3	0.47	0.69	1.05743	-10.6873	CDKN2A|1.86;PSMA1|1.74;GIGYF2|1.72;PPP1R12A|1.54;SMARCA4|0.74;CDK1|0.69;PHB2|0.67	7	537	107	38520	http://www.ebi.ac.uk/QuickGO/GTerm?id=GO:0044772
6	6	mitotic DNA integrity checkpoint	GO:0044774	6.28×10-4	7.86×10-3	-0.09	0.34	1.05743	-10.6873	PSMA1|1.74;GIGYF2|1.72;CDK1|0.69;TOP2A|0.6	4	139	107	38520	http://www.ebi.ac.uk/QuickGO/GTerm?id=GO:0044774
6	5,6	mitotic nuclear division	GO:0007067	1.32×10-3	1.28×10-2	-1.19	-0.34	1.05743	-10.6873	CLIP1|1.66;PPP1R12A|1.54;SMARCA4|0.74;KIF2A|0.71;CDK1|0.69;AURKAIP1|0.68;PHB2|0.67	7	589	107	38520	http://www.ebi.ac.uk/QuickGO/GTerm?id=GO:0007067
6	6	mitotic nuclear envelope disassembly	GO:0007077	6.12×10-3	3.19×10-2	-0.32	0.2	1.05743	-10.6873	NUP210|0.69;CDK1|0.69	2	42	107	38520	http://www.ebi.ac.uk/QuickGO/GTerm?id=GO:0007077
6	6	modification-dependent macromolecule catabolic process	GO:0043632	3.68×10-2	9.38×10-2	-1.28	-0.4	1.05743	-10.6873	PSMA1|1.74;UBE2K|1.53;ERLIN1|0.69;CDK1|0.69;PNPT1|0.69;USP39|0.69;PCYOX1|0.61	7	1120	107	38520	http://www.ebi.ac.uk/QuickGO/GTerm?id=GO:0043632
6	6	muscle hypertrophy	GO:0014896	8.92×10-3	3.93×10-2	-0.29	0.22	1.05743	-10.6873	HDAC2|0.73;CYBA|0.7	2	51	107	38520	http://www.ebi.ac.uk/QuickGO/GTerm?id=GO:0014896
6	6	negative regulation of cell cycle phase transition	GO:1901988	3.16×10-3	2.14×10-2	-0.18	0.29	1.05743	-10.6873	PSMA1|1.74;GIGYF2|1.72;SMARCA4|0.74;CDK1|0.69	4	216	107	38520	http://www.ebi.ac.uk/QuickGO/GTerm?id=GO:1901988
6	5,6	negative regulation of cell cycle process	GO:0010948	1.75×10-3	1.52×10-2	-0.48	0.1	1.05743	-10.6873	PSMA1|1.74;GIGYF2|1.72;SMARCA4|0.74;CDK1|0.69;AURKAIP1|0.68	5	309	107	38520	http://www.ebi.ac.uk/QuickGO/GTerm?id=GO:0010948
6	5,6	negative regulation of cellular amine metabolic process	GO:0033239	1.66×10-2	5.78×10-2	0	0.4	1.05743	-10.6873	LPCAT1|0.74	1	6	107	38520	http://www.ebi.ac.uk/QuickGO/GTerm?id=GO:0033239
6	6	negative regulation of cellular macromolecule biosynthetic process	GO:2000113	1.06×10-3	1.11×10-2	-2.09	-0.91	1.05743	-10.6873	CDKN2A|1.86;GIGYF2|1.72;S100A11|1.58;SMARCA4|0.74;HDAC2|0.73;YBX3|0.72;C1QBP|0.7;SMARCA5|0.7;NDUFA13|0.7;DNAJA3|0.69;PHB2|0.67;PARP1|0.66	12	1519	107	38520	http://www.ebi.ac.uk/QuickGO/GTerm?id=GO:2000113
6	4,5,6	negative regulation of cellular metabolic process	GO:0031324	1.64×10-3	1.49×10-2	-3.1	-1.53	1.05743	-10.6873	CDKN2A|1.86;PSMA1|1.74;GIGYF2|1.72;S100A11|1.58;LPCAT1|0.74;SMARCA4|0.74;HDAC2|0.73;YBX3|0.72;SERPINH1|0.72;C1QBP|0.7;SMARCA5|0.7;NDUFA13|0.7;ERLIN1|0.69;DNAJA3|0.69;PHB2|0.67;PARP1|0.66;CD44|0.47	17	2772	107	38520	http://www.ebi.ac.uk/QuickGO/GTerm?id=GO:0031324
6	5,6	negative regulation of dendritic spine development	GO:0061000	2.74×10-2	7.92×10-2	0	0.4	1.05743	-10.6873	HDAC2|0.73	1	10	107	38520	http://www.ebi.ac.uk/QuickGO/GTerm?id=GO:0061000
6	6	negative regulation of DNA binding	GO:0043392	7.93×10-3	3.76×10-2	-0.06	0.37	1.05743	-10.6873	SRI|1.57;HDAC2|0.73	2	48	107	38520	http://www.ebi.ac.uk/QuickGO/GTerm?id=GO:0043392
6	5,6	negative regulation of gene expression	GO:0010629	8.83×10-3	3.92×10-2	-1.9	-0.78	1.05743	-10.6873	CDKN2A|1.86;GIGYF2|1.72;SMARCA4|0.74;HDAC2|0.73;YBX3|0.72;C1QBP|0.7;SMARCA5|0.7;NDUFA13|0.7;DNAJA3|0.69;PHB2|0.67;PARP1|0.66	11	1733	107	38520	http://www.ebi.ac.uk/QuickGO/GTerm?id=GO:0010629
6	5,6	negative regulation of macromolecule biosynthetic process	GO:0010558	1.73×10-3	1.52×10-2	-2.09	-0.91	1.05743	-10.6873	CDKN2A|1.86;GIGYF2|1.72;S100A11|1.58;SMARCA4|0.74;HDAC2|0.73;YBX3|0.72;C1QBP|0.7;SMARCA5|0.7;NDUFA13|0.7;DNAJA3|0.69;PHB2|0.67;PARP1|0.66	12	1610	107	38520	http://www.ebi.ac.uk/QuickGO/GTerm?id=GO:0010558
6	4,5,6	negative regulation of macromolecule metabolic process	GO:0010605	9.88×10-3	4.22×10-2	-2.81	-1.35	1.05743	-10.6873	CDKN2A|1.86;PSMA1|1.74;GIGYF2|1.72;S100A11|1.58;SMARCA4|0.74;HDAC2|0.73;YBX3|0.72;SERPINH1|0.72;C1QBP|0.7;SMARCA5|0.7;NDUFA13|0.7;DNAJA3|0.69;PHB2|0.67;PARP1|0.66;CD44|0.47	15	2778	107	38520	http://www.ebi.ac.uk/QuickGO/GTerm?id=GO:0010605
6	5,6	negative regulation of nucleobase-containing compound metabolic process	GO:0045934	4.76×10-3	2.81×10-2	-1.86	-0.76	1.05743	-10.6873	CDKN2A|1.86;S100A11|1.58;SMARCA4|0.74;HDAC2|0.73;YBX3|0.72;C1QBP|0.7;SMARCA5|0.7;NDUFA13|0.7;DNAJA3|0.69;PHB2|0.67;PARP1|0.66	11	1591	107	38520	http://www.ebi.ac.uk/QuickGO/GTerm?id=GO:0045934
6	6	negative regulation of phospholipid biosynthetic process	GO:0071072	1.11×10-2	4.47×10-2	0	0.4	1.05743	-10.6873	LPCAT1|0.74	1	4	107	38520	http://www.ebi.ac.uk/QuickGO/GTerm?id=GO:0071072
6	5,6	negative regulation of programmed cell death	GO:0043069	6.53×10-5	1.47×10-3	-1.98	-0.84	1.05743	-10.6873	PSMA1|1.74;ITGA5|0.73;HDAC2|0.73;YBX3|0.72;NDUFA13|0.7;CDK1|0.69;DNAJA3|0.69;HYOU1|0.69;PHB2|0.67;MYDGF|0.65;CD44|0.47	11	943	107	38520	http://www.ebi.ac.uk/QuickGO/GTerm?id=GO:0043069
6	6	negative regulation of RNA biosynthetic process	GO:1902679	5.68×10-3	3.02×10-2	-1.66	-0.63	1.05743	-10.6873	CDKN2A|1.86;SMARCA4|0.74;HDAC2|0.73;YBX3|0.72;C1QBP|0.7;SMARCA5|0.7;NDUFA13|0.7;DNAJA3|0.69;PHB2|0.67;PARP1|0.66	10	1401	107	38520	http://www.ebi.ac.uk/QuickGO/GTerm?id=GO:1902679
6	6	neurogenesis	GO:0022008	1.44×10-2	5.33×10-2	-1.12	-0.3	1.05743	-10.6873	NDRG1|1.88;GIGYF2|1.72;STMN1|1.67;DBNL|1.6;S100A6|1.52;AIFM1|0.74;ALCAM|0.73;ITGA5|0.73;HDAC2|0.73;CSPG4|0.69;CDK1|0.69	11	1860	107	38520	http://www.ebi.ac.uk/QuickGO/GTerm?id=GO:0022008
6	6	neuron projection morphogenesis	GO:0048812	2.63×10-2	7.76×10-2	-0.17	0.29	1.05743	-10.6873	STMN1|1.67;DBNL|1.6;S100A6|1.52;ALCAM|0.73;ITGA5|0.73;CDK1|0.69	6	814	107	38520	http://www.ebi.ac.uk/QuickGO/GTerm?id=GO:0048812
6	6	nuclear division	GO:0000280	1.33×10-3	1.28×10-2	-1.41	-0.48	1.05743	-10.6873	CLIP1|1.66;PPP1R12A|1.54;SMARCA4|0.74;KIF2A|0.71;CDK1|0.69;AURKAIP1|0.68;PHB2|0.67;TOP2A|0.6	8	763	107	38520	http://www.ebi.ac.uk/QuickGO/GTerm?id=GO:0000280
6	5,6	nuclear envelope organization	GO:0006998	2.05×10-2	6.64×10-2	-0.32	0.2	1.05743	-10.6873	NUP210|0.69;CDK1|0.69	2	79	107	38520	http://www.ebi.ac.uk/QuickGO/GTerm?id=GO:0006998
6	6	nuclear transport	GO:0051169	2.70×10-3	1.95×10-2	-0.1	0.34	1.05743	-10.6873	SRRM1|1.69;SRI|1.57;PPP1R12A|1.54;LSG1|0.7;PHB2|0.67;PARP1|0.66	6	497	107	38520	http://www.ebi.ac.uk/QuickGO/GTerm?id=GO:0051169
6	6	nucleobase-containing compound transport	GO:0015931	4.34×10-2	1.01×10-1	-0.23	0.26	1.05743	-10.6873	SRRM1|1.69;NUP210|0.69;PNPT1|0.69	3	280	107	38520	http://www.ebi.ac.uk/QuickGO/GTerm?id=GO:0015931
6	6	nucleoside monophosphate metabolic process	GO:0009123	3.94×10-2	9.71×10-2	-0.56	0.05	1.05743	-10.6873	PDHA1|0.74;DLD|0.73;ATP5L|0.72;NDUFA10|0.71	4	459	107	38520	http://www.ebi.ac.uk/QuickGO/GTerm?id=GO:0009123
6	6	nucleoside triphosphate metabolic process	GO:0009141	3.56×10-2	9.17×10-2	-0.56	0.05	1.05743	-10.6873	PDHA1|0.74;DLD|0.73;ATP5L|0.72;NDUFA10|0.71	4	444	107	38520	http://www.ebi.ac.uk/QuickGO/GTerm?id=GO:0009141
6	6	odontogenesis of dentin-containing tooth	GO:0042475	2.12×10-3	1.72×10-2	-0.46	0.11	1.05743	-10.6873	BSG|0.73;HDAC2|0.73;ITGB4|0.65	3	91	107	38520	http://www.ebi.ac.uk/QuickGO/GTerm?id=GO:0042475
6	5,6	organic acid transport	GO:0015849	4.43×10-2	1.03×10-1	-0.68	-0.02	1.05743	-10.6873	SLC25A1|0.74;GLS|0.72;SLC7A5|0.63;SERINC1|0.62	4	477	107	38520	http://www.ebi.ac.uk/QuickGO/GTerm?id=GO:0015849
6	5,6	plasma membrane organization	GO:0007009	2.17×10-2	6.88×10-2	-0.2	0.28	1.05743	-10.6873	NDRG1|1.88;CLIP1|1.66;BSG|0.73;ATP1B1|0.69	4	380	107	38520	http://www.ebi.ac.uk/QuickGO/GTerm?id=GO:0007009
6	6	positive regulation of cation transmembrane transport	GO:1904064	1.52×10-3	1.42×10-2	-0.52	0.08	1.05743	-10.6873	CTSS|0.7;ATP1B1|0.69;ASPH|0.63	3	81	107	38520	http://www.ebi.ac.uk/QuickGO/GTerm?id=GO:1904064
6	5,6	positive regulation of cell cycle process	GO:0090068	3.82×10-2	9.50×10-2	0.17	0.51	1.05743	-10.6873	NDRG1|1.88;PSMA1|1.74;PHB2|0.67	3	266	107	38520	http://www.ebi.ac.uk/QuickGO/GTerm?id=GO:0090068
6	5,6	positive regulation of cellular biosynthetic process	GO:0031328	4.21×10-3	2.58×10-2	-2.43	-1.12	1.05743	-10.6873	GTF2F1|1.8;PPP1R12A|1.54;SMARCA4|0.74;HDAC2|0.73;YBX3|0.72;C1QBP|0.7;ERLIN1|0.69;PHB2|0.67;PARP1|0.66;MYDGF|0.65;ASPH|0.63;TOP2A|0.6;SSRP1|0.5	13	2033	107	38520	http://www.ebi.ac.uk/QuickGO/GTerm?id=GO:0031328
6	4,5,6	positive regulation of cellular metabolic process	GO:0031325	2.04×10-7	1.87×10-5	-5.16	-2.82	1.05743	-10.6873	GTF2F1|1.8;PSMA1|1.74;SLK|1.69;DBNL|1.6;PPP1R12A|1.54;AIFM1|0.74;SMARCA4|0.74;ITGA5|0.73;HDAC2|0.73;YBX3|0.72;C1QBP|0.7;CYBA|0.7;NDUFA13|0.7;CSPG4|0.69;ERLIN1|0.69;CDK1|0.69;ATP1B1|0.69;DNAJA3|0.69;PNPT1|0.69;AURKAIP1|0.68;PHB2|0.67;CLPX|0.67;PARP1|0.66;MYDGF|0.65;ASPH|0.63;TOP2A|0.6;SSRP1|0.5;CD44|0.47	28	3491	107	38520	http://www.ebi.ac.uk/QuickGO/GTerm?id=GO:0031325
6	5,6	positive regulation of cellular protein metabolic process	GO:0032270	8.44×10-7	5.30×10-5	-3.24	-1.62	1.05743	-10.6873	PSMA1|1.74;SLK|1.69;DBNL|1.6;AIFM1|0.74;ITGA5|0.73;HDAC2|0.73;YBX3|0.72;C1QBP|0.7;NDUFA13|0.7;CSPG4|0.69;CDK1|0.69;DNAJA3|0.69;AURKAIP1|0.68;PHB2|0.67;CLPX|0.67;MYDGF|0.65;ASPH|0.63;CD44|0.47	18	1678	107	38520	http://www.ebi.ac.uk/QuickGO/GTerm?id=GO:0032270
6	6	positive regulation of endothelial cell proliferation	GO:0001938	1.55×10-2	5.65×10-2	-0.34	0.19	1.05743	-10.6873	CYBA|0.7;MYDGF|0.65	2	68	107	38520	http://www.ebi.ac.uk/QuickGO/GTerm?id=GO:0001938
6	5,6	positive regulation of gene expression	GO:0010628	1.01×10-3	1.09×10-2	-2.76	-1.32	1.05743	-10.6873	GTF2F1|1.8;PPP1R12A|1.54;SMARCA4|0.74;HDAC2|0.73;YBX3|0.72;C1QBP|0.7;ERLIN1|0.69;PHB2|0.67;PARP1|0.66;MYDGF|0.65;ASPH|0.63;TOP2A|0.6;SSRP1|0.5;CD44|0.47	14	1949	107	38520	http://www.ebi.ac.uk/QuickGO/GTerm?id=GO:0010628
6	5,6	positive regulation of innate immune response	GO:0045089	3.23×10-3	2.17×10-2	-0.87	-0.14	1.05743	-10.6873	PSMA1|1.74;C1QBP|0.7;CYBA|0.7;CTSS|0.7;CDK1|0.69	5	356	107	38520	http://www.ebi.ac.uk/QuickGO/GTerm?id=GO:0045089
6	5,6	positive regulation of ion transmembrane transporter activity	GO:0032414	1.17×10-3	1.19×10-2	-0.52	0.08	1.05743	-10.6873	CTSS|0.7;ATP1B1|0.69;ASPH|0.63	3	74	107	38520	http://www.ebi.ac.uk/QuickGO/GTerm?id=GO:0032414
6	5,6	positive regulation of ligase activity	GO:0051351	2.83×10-2	8.12×10-2	-0.08	0.35	1.05743	-10.6873	PSMA1|1.74;CDK1|0.69	2	94	107	38520	http://www.ebi.ac.uk/QuickGO/GTerm?id=GO:0051351
6	4,5,6	positive regulation of macromolecule metabolic process	GO:0010604	2.30×10-7	2.04×10-5	-4.97	-2.7	1.05743	-10.6873	GTF2F1|1.8;PSMA1|1.74;SLK|1.69;DBNL|1.6;PPP1R12A|1.54;LPCAT1|0.74;AIFM1|0.74;SMARCA4|0.74;ITGA5|0.73;HDAC2|0.73;YBX3|0.72;C1QBP|0.7;NDUFA13|0.7;CSPG4|0.69;ERLIN1|0.69;CDK1|0.69;DNAJA3|0.69;PNPT1|0.69;AURKAIP1|0.68;PHB2|0.67;CLPX|0.67;PARP1|0.66;MYDGF|0.65;ASPH|0.63;TOP2A|0.6;SSRP1|0.5;CD44|0.47	27	3292	107	38520	http://www.ebi.ac.uk/QuickGO/GTerm?id=GO:0010604
6	6	positive regulation of miRNA catabolic process	GO:2000627	2.78×10-3	1.95×10-2	0	0.4	1.05743	-10.6873	PNPT1|0.69	1	1	107	38520	http://www.ebi.ac.uk/QuickGO/GTerm?id=GO:2000627
6	5,6	positive regulation of nucleobase-containing compound metabolic process	GO:0045935	8.57×10-3	3.83×10-2	-2.3	-1.03	1.05743	-10.6873	GTF2F1|1.8;PPP1R12A|1.54;SMARCA4|0.74;HDAC2|0.73;ERLIN1|0.69;PNPT1|0.69;PHB2|0.67;PARP1|0.66;MYDGF|0.65;ASPH|0.63;TOP2A|0.6;SSRP1|0.5	12	1969	107	38520	http://www.ebi.ac.uk/QuickGO/GTerm?id=GO:0045935
6	6	positive regulation of phosphate metabolic process	GO:0045937	9.38×10-3	4.06×10-2	-1.72	-0.67	1.05743	-10.6873	SLK|1.69;DBNL|1.6;ITGA5|0.73;HDAC2|0.73;CSPG4|0.69;CDK1|0.69;PHB2|0.67;MYDGF|0.65;CD44|0.47	9	1279	107	38520	http://www.ebi.ac.uk/QuickGO/GTerm?id=GO:0045937
6	5,6	positive regulation of programmed cell death	GO:0043068	1.10×10-2	4.47×10-2	-1.09	-0.28	1.05743	-10.6873	CDKN2A|1.86;AIFM1|0.74;C1QBP|0.7;NDUFA13|0.7;DNAJA3|0.69;TOP2A|0.6	6	668	107	38520	http://www.ebi.ac.uk/QuickGO/GTerm?id=GO:0043068
6	5,6	positive regulation of protein catabolic process	GO:0045732	7.95×10-3	3.76×10-2	-0.69	-0.03	1.05743	-10.6873	PSMA1|1.74;LPCAT1|0.74;NDUFA13|0.7;CDK1|0.69	4	281	107	38520	http://www.ebi.ac.uk/QuickGO/GTerm?id=GO:0045732
6	6	positive regulation of proteolysis	GO:0045862	3.51×10-6	1.58×10-4	-1.53	-0.55	1.05743	-10.6873	PSMA1|1.74;AIFM1|0.74;HDAC2|0.73;NDUFA13|0.7;CDK1|0.69;DNAJA3|0.69;AURKAIP1|0.68;CLPX|0.67;ASPH|0.63	9	432	107	38520	http://www.ebi.ac.uk/QuickGO/GTerm?id=GO:0045862
6	5,6	positive regulation of transferase activity	GO:0051347	2.21×10-2	6.90×10-2	-0.14	0.31	1.05743	-10.6873	PSMA1|1.74;SLK|1.69;DBNL|1.6;CSPG4|0.69;CDK1|0.69;SERINC1|0.62	6	782	107	38520	http://www.ebi.ac.uk/QuickGO/GTerm?id=GO:0051347
6	4,5,6	positive regulation of transporter activity	GO:0032411	1.57×10-3	1.44×10-2	-0.52	0.08	1.05743	-10.6873	CTSS|0.7;ATP1B1|0.69;ASPH|0.63	3	82	107	38520	http://www.ebi.ac.uk/QuickGO/GTerm?id=GO:0032411
6	5,6	positive regulation of tumor necrosis factor superfamily cytokine production	GO:1903557	9.61×10-3	4.12×10-2	-0.29	0.22	1.05743	-10.6873	HDAC2|0.73;CYBA|0.7	2	53	107	38520	http://www.ebi.ac.uk/QuickGO/GTerm?id=GO:1903557
6	5,6	prenylcysteine metabolic process	GO:0030329	2.20×10-2	6.88×10-2	0	0.4	1.05743	-10.6873	PCYOX1|0.61	1	8	107	38520	http://www.ebi.ac.uk/QuickGO/GTerm?id=GO:0030329
6	5,6	protein complex assembly	GO:0006461	4.20×10-3	2.58×10-2	-2.02	-0.86	1.05743	-10.6873	STMN1|1.67;CLIP1|1.66;DBNL|1.6;AIFM1|0.74;OAT|0.73;GLS|0.72;HM13|0.71;KIF2A|0.71;CYBA|0.7;SMARCA5|0.7;PNPT1|0.69;ACAD9|0.64	12	1795	107	38520	http://www.ebi.ac.uk/QuickGO/GTerm?id=GO:0006461
6	6	protein complex disassembly	GO:0043241	1.26×10-4	2.49×10-3	-1.14	-0.31	1.05743	-10.6873	STMN1|1.67;MRPL21|0.74;SMARCA4|0.74;MRPL54|0.72;KIF2A|0.71;AURKAIP1|0.68;ASPH|0.63	7	397	107	38520	http://www.ebi.ac.uk/QuickGO/GTerm?id=GO:0043241
6	6	protein folding	GO:0006457	1.50×10-3	1.41×10-2	-1.05	-0.25	1.05743	-10.6873	FKBP10|0.73;MLEC|0.71;DNAJA3|0.69;CLPX|0.67;GANAB|0.64;ERO1L|0.58	6	442	107	38520	http://www.ebi.ac.uk/QuickGO/GTerm?id=GO:0006457
6	6	protein localization to cell periphery	GO:1990778	3.34×10-2	8.88×10-2	-0.22	0.26	1.05743	-10.6873	CLIP1|1.66;BSG|0.73;ATP1B1|0.69	3	252	107	38520	http://www.ebi.ac.uk/QuickGO/GTerm?id=GO:1990778
6	5,6	protein localization to membrane	GO:0072657	2.00×10-3	1.64×10-2	-1.13	-0.3	1.05743	-10.6873	CLIP1|1.66;DDOST|0.74;BSG|0.73;NDUFA13|0.7;ATP1B1|0.69;DNAJA3|0.69;SEC62|0.68	7	634	107	38520	http://www.ebi.ac.uk/QuickGO/GTerm?id=GO:0072657
6	6	protein localization to organelle	GO:0033365	1.93×10-2	6.37×10-2	-1.16	-0.33	1.05743	-10.6873	SRI|1.57;DDOST|0.74;NDUFA13|0.7;CDK1|0.69;SEC62|0.68;PHB2|0.67;PARP1|0.66	7	976	107	38520	http://www.ebi.ac.uk/QuickGO/GTerm?id=GO:0033365
6	6	protein processing	GO:0016485	4.45×10-4	6.07×10-3	-1.16	-0.32	1.05743	-10.6873	AIFM1|0.74;C1QBP|0.7;CTSS|0.7;DNAJA3|0.69;PHB2|0.67;PARP1|0.66;ASPH|0.63	7	489	107	38520	http://www.ebi.ac.uk/QuickGO/GTerm?id=GO:0016485
6	5,6	protein transport	GO:0015031	1.78×10-2	6.09×10-2	-2.32	-1.05	1.05743	-10.6873	CLIP1|1.66;SRI|1.57;DDOST|0.74;ATP6V0D1|0.74;BSG|0.73;HM13|0.71;LSG1|0.7;NDUFA13|0.7;NUP210|0.69;ATP1B1|0.69;SEC62|0.68;PHB2|0.67;PARP1|0.66;ASPH|0.63	14	2708	107	38520	http://www.ebi.ac.uk/QuickGO/GTerm?id=GO:0015031
6	6	protein-DNA complex disassembly	GO:0032986	4.62×10-2	1.05×10-1	0	0.4	1.05743	-10.6873	SMARCA4|0.74	1	17	107	38520	http://www.ebi.ac.uk/QuickGO/GTerm?id=GO:0032986
6	6	purine nucleoside metabolic process	GO:0042278	1.61×10-2	5.78×10-2	-0.75	-0.07	1.05743	-10.6873	PDHA1|0.74;DLD|0.73;ATP5L|0.72;NDUFA10|0.71;MCCC2|0.64	5	528	107	38520	http://www.ebi.ac.uk/QuickGO/GTerm?id=GO:0042278
6	6	regulation of CDP-diacylglycerol-serine O-phosphatidyltransferase activity	GO:1904217	5.55×10-3	2.96×10-2	0	0.4	1.05743	-10.6873	SERINC1|0.62	1	2	107	38520	http://www.ebi.ac.uk/QuickGO/GTerm?id=GO:1904217
6	5,6	regulation of cell communication by electrical coupling	GO:0010649	4.14×10-4	5.81×10-3	0	0.41	1.05743	-10.6873	SRI|1.57;ASPH|0.63	2	11	107	38520	http://www.ebi.ac.uk/QuickGO/GTerm?id=GO:0010649
6	6	regulation of cell cycle phase transition	GO:1901987	2.24×10-3	1.78×10-2	-0.48	0.1	1.05743	-10.6873	PSMA1|1.74;GIGYF2|1.72;SMARCA4|0.74;CDK1|0.69;PHB2|0.67	5	327	107	38520	http://www.ebi.ac.uk/QuickGO/GTerm?id=GO:1901987
6	5,6	regulation of cellular amide metabolic process	GO:0034248	2.46×10-2	7.44×10-2	-0.73	-0.05	1.05743	-10.6873	GIGYF2|1.72;YBX3|0.72;C1QBP|0.7;LARS2|0.64	4	395	107	38520	http://www.ebi.ac.uk/QuickGO/GTerm?id=GO:0034248
6	5,6	regulation of cellular amine metabolic process	GO:0033238	3.00×10-2	8.34×10-2	-0.11	0.33	1.05743	-10.6873	PSMA1|1.74;LPCAT1|0.74	2	97	107	38520	http://www.ebi.ac.uk/QuickGO/GTerm?id=GO:0033238
6	5,6	regulation of cellular ketone metabolic process	GO:0010565	2.85×10-4	4.30×10-3	-0.84	-0.12	1.05743	-10.6873	PSMA1|1.74;PDHA1|0.74;DLD|0.73;ERLIN1|0.69;PDHB|0.67	5	206	107	38520	http://www.ebi.ac.uk/QuickGO/GTerm?id=GO:0010565
6	5,6	regulation of cellular protein metabolic process	GO:0032268	9.94×10-6	3.41×10-4	-4.46	-2.38	1.05743	-10.6873	CDKN2A|1.86;PSMA1|1.74;GIGYF2|1.72;SLK|1.69;DBNL|1.6;PPP1R12A|1.54;UBE2K|1.53;AIFM1|0.74;ITGA5|0.73;HDAC2|0.73;YBX3|0.72;SERPINH1|0.72;C1QBP|0.7;NDUFA13|0.7;CSPG4|0.69;CDK1|0.69;DNAJA3|0.69;AURKAIP1|0.68;PHB2|0.67;CLPX|0.67;MYDGF|0.65;LARS2|0.64;ASPH|0.63;CD44|0.47	24	3298	107	38520	http://www.ebi.ac.uk/QuickGO/GTerm?id=GO:0032268
6	5,6	regulation of cellular response to hypoxia	GO:1900037	2.47×10-2	7.44×10-2	0	0.4	1.05743	-10.6873	HYOU1|0.69	1	9	107	38520	http://www.ebi.ac.uk/QuickGO/GTerm?id=GO:1900037
6	6	regulation of coenzyme metabolic process	GO:0051196	3.71×10-4	5.31×10-3	-0.44	0.13	1.05743	-10.6873	PDHA1|0.74;DLD|0.73;PDHB|0.67	3	50	107	38520	http://www.ebi.ac.uk/QuickGO/GTerm?id=GO:0051196
6	6	regulation of cytoplasmic transport	GO:1903649	7.59×10-3	3.70×10-2	-0.38	0.16	1.05743	-10.6873	SRI|1.57;PPP1R12A|1.54;CYBA|0.7;PARP1|0.66;ASPH|0.63	5	437	107	38520	http://www.ebi.ac.uk/QuickGO/GTerm?id=GO:1903649
6	6	regulation of dendritic cell chemotaxis	GO:2000508	1.93×10-2	6.37×10-2	0	0.4	1.05743	-10.6873	C1QBP|0.7	1	7	107	38520	http://www.ebi.ac.uk/QuickGO/GTerm?id=GO:2000508
6	6	regulation of endothelial cell proliferation	GO:0001936	3.00×10-2	8.34×10-2	-0.34	0.19	1.05743	-10.6873	CYBA|0.7;MYDGF|0.65	2	97	107	38520	http://www.ebi.ac.uk/QuickGO/GTerm?id=GO:0001936
6	6	regulation of fatty acid metabolic process	GO:0019217	9.58×10-5	2.00×10-3	-0.6	0.03	1.05743	-10.6873	PDHA1|0.74;DLD|0.73;ERLIN1|0.69;PDHB|0.67	4	85	107	38520	http://www.ebi.ac.uk/QuickGO/GTerm?id=GO:0019217
6	5,6	regulation of innate immune response	GO:0045088	1.25×10-3	1.25×10-2	-1.03	-0.24	1.05743	-10.6873	PSMA1|1.74;C1QBP|0.7;CYBA|0.7;CTSS|0.7;CDK1|0.69;DNAJA3|0.69	6	426	107	38520	http://www.ebi.ac.uk/QuickGO/GTerm?id=GO:0045088
6	5,6	regulation of lipid biosynthetic process	GO:0046890	4.68×10-2	1.06×10-1	-0.29	0.22	1.05743	-10.6873	LPCAT1|0.74;ERLIN1|0.69	2	124	107	38520	http://www.ebi.ac.uk/QuickGO/GTerm?id=GO:0046890
6	5,6	regulation of mitotic cell cycle	GO:0007346	1.53×10-4	2.89×10-3	-1.7	-0.66	1.05743	-10.6873	PSMA1|1.74;GIGYF2|1.72;SLK|1.69;SMARCA4|0.74;TRRAP|0.72;CDK1|0.69;AURKAIP1|0.68;PHB2|0.67;TOP2A|0.6	9	701	107	38520	http://www.ebi.ac.uk/QuickGO/GTerm?id=GO:0007346
6	5,6	regulation of muscle system process	GO:0090257	2.50×10-2	7.51×10-2	-0.2	0.28	1.05743	-10.6873	SRI|1.57;ATP1B1|0.69;ASPH|0.63	3	225	107	38520	http://www.ebi.ac.uk/QuickGO/GTerm?id=GO:0090257
6	6	regulation of peptidase activity	GO:0052547	1.42×10-3	1.35×10-2	-1.29	-0.4	1.05743	-10.6873	AIFM1|0.74;SERPINH1|0.72;NDUFA13|0.7;DNAJA3|0.69;CLPX|0.67;ASPH|0.63;CD44|0.47	7	597	107	38520	http://www.ebi.ac.uk/QuickGO/GTerm?id=GO:0052547
6	6	regulation of phospholipid biosynthetic process	GO:0071071	3.28×10-2	8.77×10-2	0	0.4	1.05743	-10.6873	LPCAT1|0.74	1	12	107	38520	http://www.ebi.ac.uk/QuickGO/GTerm?id=GO:0071071
6	5,6	regulation of phosphorus metabolic process	GO:0051174	1.58×10-4	2.92×10-3	-2.91	-1.41	1.05743	-10.6873	CDKN2A|1.86;SLK|1.69;DBNL|1.6;PPP1R12A|1.54;LPCAT1|0.74;PDHA1|0.74;DLD|0.73;ITGA5|0.73;HDAC2|0.73;CSPG4|0.69;CDK1|0.69;DNAJA3|0.69;PHB2|0.67;PDHB|0.67;MYDGF|0.65;CD44|0.47	16	2036	107	38520	http://www.ebi.ac.uk/QuickGO/GTerm?id=GO:0051174
6	5,6	regulation of programmed cell death	GO:0043067	4.74×10-5	1.17×10-3	-2.99	-1.46	1.05743	-10.6873	CDKN2A|1.86;PSMA1|1.74;SLK|1.69;AIFM1|0.74;ITGA5|0.73;HDAC2|0.73;YBX3|0.72;C1QBP|0.7;NDUFA13|0.7;CDK1|0.69;DNAJA3|0.69;HYOU1|0.69;PHB2|0.67;MYDGF|0.65;TOP2A|0.6;CD44|0.47	16	1836	107	38520	http://www.ebi.ac.uk/QuickGO/GTerm?id=GO:0043067
6	4,6	regulation of protein activation cascade	GO:2000257	6.12×10-3	3.19×10-2	-0.33	0.2	1.05743	-10.6873	C1QBP|0.7;PHB2|0.67	2	42	107	38520	http://www.ebi.ac.uk/QuickGO/GTerm?id=GO:2000257
6	6	regulation of protein maturation	GO:1903317	3.53×10-2	9.17×10-2	-0.33	0.2	1.05743	-10.6873	C1QBP|0.7;PHB2|0.67	2	106	107	38520	http://www.ebi.ac.uk/QuickGO/GTerm?id=GO:1903317
6	6	regulation of proteolysis	GO:0030162	6.72×10-6	2.62×10-4	-2.51	-1.17	1.05743	-10.6873	PSMA1|1.74;UBE2K|1.53;AIFM1|0.74;HDAC2|0.73;SERPINH1|0.72;C1QBP|0.7;NDUFA13|0.7;CDK1|0.69;DNAJA3|0.69;AURKAIP1|0.68;PHB2|0.67;CLPX|0.67;ASPH|0.63;CD44|0.47	14	1209	107	38520	http://www.ebi.ac.uk/QuickGO/GTerm?id=GO:0030162
6	5,6	regulation of respiratory gaseous exchange by neurological system process	GO:0002087	3.55×10-2	9.17×10-2	0	0.4	1.05743	-10.6873	GLS|0.72	1	13	107	38520	http://www.ebi.ac.uk/QuickGO/GTerm?id=GO:0002087
6	6	regulation of serine C-palmitoyltransferase activity	GO:1904220	5.55×10-3	2.96×10-2	0	0.4	1.05743	-10.6873	SERINC1|0.62	1	2	107	38520	http://www.ebi.ac.uk/QuickGO/GTerm?id=GO:1904220
6	4,5,6	regulation of signal transduction	GO:0009966	3.08×10-3	2.10×10-2	-3.17	-1.58	1.05743	-10.6873	PSMA1|1.74;DBNL|1.6;SMARCA4|0.74;ITGA5|0.73;HDAC2|0.73;YBX3|0.72;C1QBP|0.7;CYBA|0.7;NDUFA13|0.7;CSPG4|0.69;CDK1|0.69;DNAJA3|0.69;HYOU1|0.69;PHB2|0.67;PARP1|0.66;MYDGF|0.65;ASPH|0.63;CD44|0.47	18	3203	107	38520	http://www.ebi.ac.uk/QuickGO/GTerm?id=GO:0009966
6	5,6	regulation of sulfur metabolic process	GO:0042762	1.95×10-5	5.99×10-4	-0.44	0.13	1.05743	-10.6873	PDHA1|0.74;DLD|0.73;PDHB|0.67	3	19	107	38520	http://www.ebi.ac.uk/QuickGO/GTerm?id=GO:0042762
6	6	regulation of transcription regulatory region DNA binding	GO:2000677	3.37×10-3	2.23×10-2	-0.02	0.39	1.05743	-10.6873	SRI|1.57;PARP1|0.66	2	31	107	38520	http://www.ebi.ac.uk/QuickGO/GTerm?id=GO:2000677
6	5,6	regulation of transmembrane transporter activity	GO:0022898	4.02×10-3	2.54×10-2	-0.71	-0.04	1.05743	-10.6873	SRI|1.57;CTSS|0.7;ATP1B1|0.69;ASPH|0.63	4	231	107	38520	http://www.ebi.ac.uk/QuickGO/GTerm?id=GO:0022898
6	5,6	regulation of tumor necrosis factor superfamily cytokine production	GO:1903555	3.06×10-2	8.40×10-2	-0.29	0.22	1.05743	-10.6873	HDAC2|0.73;CYBA|0.7	2	98	107	38520	http://www.ebi.ac.uk/QuickGO/GTerm?id=GO:1903555
6	6	regulation of ubiquitin-protein ligase activity involved in mitotic cell cycle	GO:0051439	4.28×10-2	1.01×10-1	-0.08	0.35	1.05743	-10.6873	PSMA1|1.74;CDK1|0.69	2	118	107	38520	http://www.ebi.ac.uk/QuickGO/GTerm?id=GO:0051439
6	4,5,6	regulation of viral process	GO:0050792	2.31×10-3	1.80×10-2	-0.91	-0.17	1.05743	-10.6873	GTF2F1|1.8;SMARCA4|0.74;TOP2A|0.6;SSRP1|0.5	4	198	107	38520	http://www.ebi.ac.uk/QuickGO/GTerm?id=GO:0050792
6	6	relaxation of muscle	GO:0090075	2.76×10-3	1.95×10-2	-0.03	0.38	1.05743	-10.6873	SRI|1.57;ATP1B1|0.69	2	28	107	38520	http://www.ebi.ac.uk/QuickGO/GTerm?id=GO:0090075
6	4,6	reproductive structure development	GO:0048608	3.48×10-2	9.16×10-2	-0.87	-0.14	1.05743	-10.6873	BSG|0.73;YBX3|0.72;HSD17B4|0.54;CD44|0.47	4	441	107	38520	http://www.ebi.ac.uk/QuickGO/GTerm?id=GO:0048608
6	5,6	respiratory electron transport chain	GO:0022904	8.99×10-4	1.02×10-2	-0.58	0.04	1.05743	-10.6873	DLD|0.73;ATP5L|0.72;NDUFA10|0.71;NDUFA13|0.7	4	153	107	38520	http://www.ebi.ac.uk/QuickGO/GTerm?id=GO:0022904
6	6	response to caffeine	GO:0031000	3.82×10-2	9.50×10-2	0	0.4	1.05743	-10.6873	HDAC2|0.73	1	14	107	38520	http://www.ebi.ac.uk/QuickGO/GTerm?id=GO:0031000
6	6	response to calcium ion	GO:0051592	3.84×10-2	9.51×10-2	-0.37	0.17	1.05743	-10.6873	FUS|0.67;ASPH|0.63	2	111	107	38520	http://www.ebi.ac.uk/QuickGO/GTerm?id=GO:0051592
6	6	response to dopamine	GO:1903350	1.93×10-2	6.37×10-2	0	0.4	1.05743	-10.6873	HDAC2|0.73	1	7	107	38520	http://www.ebi.ac.uk/QuickGO/GTerm?id=GO:1903350
6	6	response to gamma radiation	GO:0010332	9.61×10-3	4.12×10-2	-0.05	0.37	1.05743	-10.6873	TMEM109|1.61;CYBA|0.7	2	53	107	38520	http://www.ebi.ac.uk/QuickGO/GTerm?id=GO:0010332
6	4,6	response to hypoxia	GO:0001666	4.12×10-2	9.92×10-2	-0.27	0.23	1.05743	-10.6873	NDRG1|1.88;ATP1B1|0.69;HYOU1|0.69	3	274	107	38520	http://www.ebi.ac.uk/QuickGO/GTerm?id=GO:0001666
6	6	response to interferon-beta	GO:0035456	8.94×10-4	1.02×10-2	-0.32	0.2	1.05743	-10.6873	NDUFA13|0.7;PNPT1|0.69	2	16	107	38520	http://www.ebi.ac.uk/QuickGO/GTerm?id=GO:0035456
6	4,6	response to virus	GO:0009615	3.41×10-2	8.99×10-2	-0.16	0.3	1.05743	-10.6873	GTF2F1|1.8;STMN1|1.67;C1QBP|0.7;ATP1B1|0.69	4	438	107	38520	http://www.ebi.ac.uk/QuickGO/GTerm?id=GO:0009615
6	6	ribonucleoside metabolic process	GO:0009119	1.97×10-2	6.46×10-2	-0.75	-0.07	1.05743	-10.6873	PDHA1|0.74;DLD|0.73;ATP5L|0.72;NDUFA10|0.71;MCCC2|0.64	5	556	107	38520	http://www.ebi.ac.uk/QuickGO/GTerm?id=GO:0009119
6	6	ribosome assembly	GO:0042255	1.72×10-2	5.93×10-2	-0.42	0.14	1.05743	-10.6873	C1QBP|0.7;BMS1|0.54	2	72	107	38520	http://www.ebi.ac.uk/QuickGO/GTerm?id=GO:0042255
6	5,6	RNA metabolic process	GO:0016070	4.27×10-2	1.01×10-1	-5.71	-3.17	1.05743	-10.6873	CDKN2A|1.86;GTF2F1|1.8;SRRM1|1.69;PPP1R12A|1.54;SMARCA4|0.74;HDAC2|0.73;SLTM|0.73;NARS2|0.72;YBX3|0.72;DHX30|0.72;GLS|0.72;TRRAP|0.72;C1QBP|0.7;SMARCA5|0.7;NDUFA13|0.7;CARS2|0.7;NUP210|0.69;ERLIN1|0.69;CDK1|0.69;DNAJA3|0.69;PNPT1|0.69;HNRNPR|0.69;USP39|0.69;PHB2|0.67;FUS|0.67;PARP1|0.66;MYDGF|0.65;LARS2|0.64;ASPH|0.63;TOP2A|0.6;EWSR1|0.53;SSRP1|0.5	32	8616	107	38520	http://www.ebi.ac.uk/QuickGO/GTerm?id=GO:0016070
6	5,6	RNA transport	GO:0050658	2.42×10-2	7.42×10-2	-0.23	0.26	1.05743	-10.6873	SRRM1|1.69;NUP210|0.69;PNPT1|0.69	3	222	107	38520	http://www.ebi.ac.uk/QuickGO/GTerm?id=GO:0050658
6	5,6	rRNA transport	GO:0051029	3.01×10-2	8.34×10-2	0	0.4	1.05743	-10.6873	PNPT1|0.69	1	11	107	38520	http://www.ebi.ac.uk/QuickGO/GTerm?id=GO:0051029
6	6	short-chain fatty acid metabolic process	GO:0046459	4.35×10-2	1.01×10-1	0	0.4	1.05743	-10.6873	MUT|0.74	1	16	107	38520	http://www.ebi.ac.uk/QuickGO/GTerm?id=GO:0046459
6	6	signal transduction in response to DNA damage	GO:0042770	6.81×10-3	3.43×10-2	0.33	0.61	1.05743	-10.6873	NDRG1|1.88;PSMA1|1.74;CD44|0.47	3	138	107	38520	http://www.ebi.ac.uk/QuickGO/GTerm?id=GO:0042770
6	5,6	single-organism intracellular transport	GO:1902582	2.86×10-4	4.30×10-3	-2.79	-1.34	1.05743	-10.6873	SRRM1|1.69;CLIP1|1.66;SRI|1.57;DDOST|0.74;BSG|0.73;ATP5L|0.72;HM13|0.71;CYBA|0.7;NDUFA13|0.7;ATP1B1|0.69;PNPT1|0.69;SEC62|0.68;PHB2|0.67;PARP1|0.66;ASPH|0.63;ERO1L|0.58	16	2146	107	38520	http://www.ebi.ac.uk/QuickGO/GTerm?id=GO:1902582
6	6	skeletal muscle acetylcholine-gated channel clustering	GO:0071340	2.20×10-2	6.88×10-2	0	0.4	1.05743	-10.6873	DNAJA3|0.69	1	8	107	38520	http://www.ebi.ac.uk/QuickGO/GTerm?id=GO:0071340
6	6	thelarche	GO:0042695	1.66×10-2	5.78×10-2	0	0.4	1.05743	-10.6873	PHB2|0.67	1	6	107	38520	http://www.ebi.ac.uk/QuickGO/GTerm?id=GO:0042695
6	6	tongue morphogenesis	GO:0043587	2.74×10-2	7.92×10-2	0	0.4	1.05743	-10.6873	HDAC2|0.73	1	10	107	38520	http://www.ebi.ac.uk/QuickGO/GTerm?id=GO:0043587
6	6	translation	GO:0006412	6.89×10-4	8.40×10-3	-1.74	-0.69	1.05743	-10.6873	GIGYF2|1.72;DDOST|0.74;MRPL21|0.74;MRPL54|0.72;NARS2|0.72;YBX3|0.72;TUFM|0.71;C1QBP|0.7;CARS2|0.7;AURKAIP1|0.68;LARS2|0.64	11	1242	107	38520	http://www.ebi.ac.uk/QuickGO/GTerm?id=GO:0006412
6	4,5,6	transmembrane transport	GO:0055085	2.56×10-2	7.64×10-2	-2.38	-1.08	1.05743	-10.6873	SRI|1.57;S100A6|1.52;SFXN3|0.74;SLC25A1|0.74;ATP6V0D1|0.74;ATP5L|0.72;CTSS|0.7;NDUFA13|0.7;NUP210|0.69;ATP1B1|0.69;SLC7A5|0.63;ASPH|0.63;SLCO3A1|0.61;PCYOX1|0.61	14	2840	107	38520	http://www.ebi.ac.uk/QuickGO/GTerm?id=GO:0055085
6	5,6	trophoblast cell migration	GO:0061450	1.93×10-2	6.37×10-2	0	0.4	1.05743	-10.6873	C1QBP|0.7	1	7	107	38520	http://www.ebi.ac.uk/QuickGO/GTerm?id=GO:0061450
6	6	tumor necrosis factor production	GO:0032640	2.94×10-2	8.34×10-2	-0.29	0.22	1.05743	-10.6873	HDAC2|0.73;CYBA|0.7	2	96	107	38520	http://www.ebi.ac.uk/QuickGO/GTerm?id=GO:0032640
6	6	very long-chain fatty acid metabolic process	GO:0000038	2.96×10-3	2.03×10-2	-0.4	0.15	1.05743	-10.6873	TECR|0.74;HSD17B4|0.54	2	29	107	38520	http://www.ebi.ac.uk/QuickGO/GTerm?id=GO:0000038
6	4,6	viral gene expression	GO:0019080	2.72×10-3	1.95×10-2	-0.85	-0.13	1.05743	-10.6873	GTF2F1|1.8;SMARCA4|0.74;NUP210|0.69;SSRP1|0.5	4	207	107	38520	http://www.ebi.ac.uk/QuickGO/GTerm?id=GO:0019080
6	5,6	viral life cycle	GO:0019058	7.11×10-3	3.54×10-2	-1.07	-0.27	1.05743	-10.6873	GTF2F1|1.8;SMARCA4|0.74;NUP210|0.69;TOP2A|0.6;SSRP1|0.5	5	430	107	38520	http://www.ebi.ac.uk/QuickGO/GTerm?id=GO:0019058
6	6	water-soluble vitamin metabolic process	GO:0006767	3.41×10-2	8.99×10-2	-0.32	0.2	1.05743	-10.6873	MUT|0.74;MCCC2|0.64	2	104	107	38520	http://www.ebi.ac.uk/QuickGO/GTerm?id=GO:0006767
6	6	wound healing involved in inflammatory response	GO:0002246	1.66×10-2	5.78×10-2	0	0.4	1.05743	-10.6873	CD44|0.47	1	6	107	38520	http://www.ebi.ac.uk/QuickGO/GTerm?id=GO:0002246
6	6	wound healing, spreading of epidermal cells	GO:0035313	4.62×10-2	1.05×10-1	0	0.4	1.05743	-10.6873	ITGA5|0.73	1	17	107	38520	http://www.ebi.ac.uk/QuickGO/GTerm?id=GO:0035313
7	6,7	acetyl-CoA metabolic process	GO:0006084	1.28×10-4	2.49×10-3	-0.44	0.13	1.05743	-10.6873	PDHA1|0.74;DLD|0.73;PDHB|0.67	3	35	107	38520	http://www.ebi.ac.uk/QuickGO/GTerm?id=GO:0006084
7	4,6,7	activation of innate immune response	GO:0002218	1.73×10-3	1.52×10-2	-0.87	-0.14	1.05743	-10.6873	PSMA1|1.74;C1QBP|0.7;CYBA|0.7;CTSS|0.7;CDK1|0.69	5	308	107	38520	http://www.ebi.ac.uk/QuickGO/GTerm?id=GO:0002218
7	6,7	acyl-CoA biosynthetic process	GO:0071616	1.18×10-7	1.60×10-5	-0.7	-0.04	1.05743	-10.6873	SLC25A1|0.74;TECR|0.74;PDHA1|0.74;DLD|0.73;PDHB|0.67	5	42	107	38520	http://www.ebi.ac.uk/QuickGO/GTerm?id=GO:0071616
7	6,7	aerobic respiration	GO:0009060	9.64×10-6	3.37×10-4	-0.78	-0.08	1.05743	-10.6873	PDHA1|0.74;DLD|0.73;MDH2|0.68;CS|0.68;PDHB|0.67	5	101	107	38520	http://www.ebi.ac.uk/QuickGO/GTerm?id=GO:0009060
7	7	alpha-linolenic acid metabolic process	GO:0036109	3.55×10-2	9.17×10-2	0	0.4	1.05743	-10.6873	HSD17B4|0.54	1	13	107	38520	http://www.ebi.ac.uk/QuickGO/GTerm?id=GO:0036109
7	6,7	apoptotic chromosome condensation	GO:0030263	1.38×10-2	5.13×10-2	0	0.4	1.05743	-10.6873	TOP2A|0.6	1	5	107	38520	http://www.ebi.ac.uk/QuickGO/GTerm?id=GO:0030263
7	5,6,7	apoptotic signaling pathway	GO:0097190	8.58×10-4	9.99×10-3	-1.55	-0.56	1.05743	-10.6873	TMEM109|1.61;UBE2K|1.53;AIFM1|0.74;YBX3|0.72;NDUFA13|0.7;HYOU1|0.69;ERO1L|0.58;CD44|0.47	8	712	107	38520	http://www.ebi.ac.uk/QuickGO/GTerm?id=GO:0097190
7	7	aromatic amino acid transport	GO:0015801	3.01×10-2	8.34×10-2	0	0.4	1.05743	-10.6873	SLC7A5|0.63	1	11	107	38520	http://www.ebi.ac.uk/QuickGO/GTerm?id=GO:0015801
7	6,7	ATP synthesis coupled electron transport	GO:0042773	2.61×10-2	7.74×10-2	-0.29	0.22	1.05743	-10.6873	DLD|0.73;NDUFA10|0.71	2	90	107	38520	http://www.ebi.ac.uk/QuickGO/GTerm?id=GO:0042773
7	6,7	basement membrane disassembly	GO:0034769	5.55×10-3	2.96×10-2	0	0.4	1.05743	-10.6873	CTSS|0.7	1	2	107	38520	http://www.ebi.ac.uk/QuickGO/GTerm?id=GO:0034769
7	5,7	behavioral response to ethanol	GO:0048149	3.28×10-2	8.77×10-2	0	0.4	1.05743	-10.6873	HDAC2|0.73	1	12	107	38520	http://www.ebi.ac.uk/QuickGO/GTerm?id=GO:0048149
7	5,7	biotin metabolic process	GO:0006768	3.01×10-2	8.34×10-2	0	0.4	1.05743	-10.6873	MCCC2|0.64	1	11	107	38520	http://www.ebi.ac.uk/QuickGO/GTerm?id=GO:0006768
7	7	branched-chain amino acid transport	GO:0015803	4.09×10-2	9.87×10-2	0	0.4	1.05743	-10.6873	SLC7A5|0.63	1	15	107	38520	http://www.ebi.ac.uk/QuickGO/GTerm?id=GO:0015803
7	6,7	calcium ion transport into cytosol	GO:0060402	4.21×10-4	5.89×10-3	-0.79	-0.09	1.05743	-10.6873	SRI|1.57;CYBA|0.7;ASPH|0.63;ERO1L|0.58	4	125	107	38520	http://www.ebi.ac.uk/QuickGO/GTerm?id=GO:0060402
7	6,7	carboxylic acid transport	GO:0046942	4.29×10-2	1.01×10-1	-0.68	-0.02	1.05743	-10.6873	SLC25A1|0.74;GLS|0.72;SLC7A5|0.63;SERINC1|0.62	4	472	107	38520	http://www.ebi.ac.uk/QuickGO/GTerm?id=GO:0046942
7	7	cation homeostasis	GO:0055080	4.03×10-3	2.54×10-2	-1.21	-0.35	1.05743	-10.6873	SRI|1.57;SFXN3|0.74;ATP6V0D1|0.74;CYBA|0.7;ATP1B1|0.69;ASPH|0.63;ERO1L|0.58	7	720	107	38520	http://www.ebi.ac.uk/QuickGO/GTerm?id=GO:0055080
7	6,7	cation transport	GO:0006812	4.76×10-2	1.07×10-1	-1.79	-0.71	1.05743	-10.6873	SRI|1.57;ATP6V0D1|0.74;ATP5L|0.72;CYBA|0.7;CTSS|0.7;ATP1B1|0.69;SLC7A5|0.63;ASPH|0.63;SERINC1|0.62;ERO1L|0.58	10	1971	107	38520	http://www.ebi.ac.uk/QuickGO/GTerm?id=GO:0006812
7	7	cell-type specific apoptotic process	GO:0097285	3.86×10-2	9.53×10-2	-0.72	-0.05	1.05743	-10.6873	CDKN2A|1.86;AIFM1|0.74;DNAJA3|0.69;HYOU1|0.69	4	456	107	38520	http://www.ebi.ac.uk/QuickGO/GTerm?id=GO:0097285
7	5,7	cellular amino acid catabolic process	GO:0009063	6.27×10-5	1.47×10-3	-0.86	-0.13	1.05743	-10.6873	DLD|0.73;GLS|0.72;ETHE1|0.68;MCCC2|0.64;PCYOX1|0.61	5	149	107	38520	http://www.ebi.ac.uk/QuickGO/GTerm?id=GO:0009063
7	6,7	cellular ion homeostasis	GO:0006873	8.22×10-3	3.76×10-2	-1.08	-0.27	1.05743	-10.6873	SRI|1.57;ATP6V0D1|0.74;CYBA|0.7;ATP1B1|0.69;ASPH|0.63;ERO1L|0.58	6	627	107	38520	http://www.ebi.ac.uk/QuickGO/GTerm?id=GO:0006873
7	7	cellular protein complex disassembly	GO:0043624	6.29×10-4	7.86×10-3	-1.01	-0.23	1.05743	-10.6873	STMN1|1.67;MRPL21|0.74;MRPL54|0.72;KIF2A|0.71;AURKAIP1|0.68;ASPH|0.63	6	373	107	38520	http://www.ebi.ac.uk/QuickGO/GTerm?id=GO:0043624
7	6,7	cellular response to brefeldin A	GO:0071238	2.78×10-3	1.95×10-2	0	0.4	1.05743	-10.6873	MYDGF|0.65	1	1	107	38520	http://www.ebi.ac.uk/QuickGO/GTerm?id=GO:0071238
7	7	cellular response to calcium ion	GO:0071277	6.70×10-3	3.39×10-2	-0.37	0.17	1.05743	-10.6873	FUS|0.67;ASPH|0.63	2	44	107	38520	http://www.ebi.ac.uk/QuickGO/GTerm?id=GO:0071277
7	7	cellular response to dopamine	GO:1903351	1.93×10-2	6.37×10-2	0	0.4	1.05743	-10.6873	HDAC2|0.73	1	7	107	38520	http://www.ebi.ac.uk/QuickGO/GTerm?id=GO:1903351
7	7	cellular response to gamma radiation	GO:0071480	1.01×10-3	1.09×10-2	-0.05	0.37	1.05743	-10.6873	TMEM109|1.61;CYBA|0.7	2	17	107	38520	http://www.ebi.ac.uk/QuickGO/GTerm?id=GO:0071480
7	5,7	cellular response to hypoxia	GO:0071456	4.82×10-2	1.08×10-1	-0.11	0.33	1.05743	-10.6873	NDRG1|1.88;HYOU1|0.69	2	126	107	38520	http://www.ebi.ac.uk/QuickGO/GTerm?id=GO:0071456
7	7	cellular response to insulin stimulus	GO:0032869	4.69×10-2	1.06×10-1	-0.47	0.11	1.05743	-10.6873	ATP6V0D1|0.74;CDK1|0.69;PARP1|0.66	3	289	107	38520	http://www.ebi.ac.uk/QuickGO/GTerm?id=GO:0032869
7	7	cellular response to interferon-beta	GO:0035458	3.39×10-4	4.98×10-3	-0.32	0.2	1.05743	-10.6873	NDUFA13|0.7;PNPT1|0.69	2	10	107	38520	http://www.ebi.ac.uk/QuickGO/GTerm?id=GO:0035458
7	7	cellular response to monosaccharide stimulus	GO:0071326	3.59×10-2	9.18×10-2	-0.04	0.38	1.05743	-10.6873	SRI|1.57;CYBA|0.7	2	107	107	38520	http://www.ebi.ac.uk/QuickGO/GTerm?id=GO:0071326
7	6,7	cellular response to unfolded protein	GO:0034620	6.07×10-5	1.45×10-3	-0.88	-0.15	1.05743	-10.6873	ATP6V0D1|0.74;HYOU1|0.69;SEC62|0.68;MYDGF|0.65;ERO1L|0.58	5	148	107	38520	http://www.ebi.ac.uk/QuickGO/GTerm?id=GO:0034620
7	7	chaperone-mediated protein folding	GO:0061077	2.67×10-2	7.86×10-2	-0.37	0.17	1.05743	-10.6873	FKBP10|0.73;ERO1L|0.58	2	91	107	38520	http://www.ebi.ac.uk/QuickGO/GTerm?id=GO:0061077
7	6,7	chemical homeostasis within a tissue	GO:0048875	3.82×10-2	9.50×10-2	0	0.4	1.05743	-10.6873	LPCAT1|0.74	1	14	107	38520	http://www.ebi.ac.uk/QuickGO/GTerm?id=GO:0048875
7	7	chromatin remodeling	GO:0006338	1.81×10-4	3.19×10-3	-1.16	-0.32	1.05743	-10.6873	CDKN2A|1.86;SMARCA4|0.74;HDAC2|0.73;SMARCA5|0.7;TOP1|0.68;SSRP1|0.5	6	295	107	38520	http://www.ebi.ac.uk/QuickGO/GTerm?id=GO:0006338
7	7	co-translational protein modification	GO:0043686	8.31×10-3	3.76×10-2	0	0.4	1.05743	-10.6873	STT3A|0.73	1	3	107	38520	http://www.ebi.ac.uk/QuickGO/GTerm?id=GO:0043686
7	7	dermatan sulfate proteoglycan metabolic process	GO:0050655	4.35×10-2	1.01×10-1	0	0.4	1.05743	-10.6873	CSPG4|0.69	1	16	107	38520	http://www.ebi.ac.uk/QuickGO/GTerm?id=GO:0050655
7	5,7	detection of calcium ion	GO:0005513	3.28×10-2	8.77×10-2	0	0.4	1.05743	-10.6873	ASPH|0.63	1	12	107	38520	http://www.ebi.ac.uk/QuickGO/GTerm?id=GO:0005513
7	7	dicarboxylic acid biosynthetic process	GO:0043650	3.28×10-2	8.77×10-2	0	0.4	1.05743	-10.6873	GLS|0.72	1	12	107	38520	http://www.ebi.ac.uk/QuickGO/GTerm?id=GO:0043650
7	7	dicarboxylic acid metabolic process	GO:0043648	2.93×10-3	2.02×10-2	-0.45	0.12	1.05743	-10.6873	DLD|0.73;GLS|0.72;MDH2|0.68	3	102	107	38520	http://www.ebi.ac.uk/QuickGO/GTerm?id=GO:0043648
7	7	DNA packaging	GO:0006323	4.66×10-3	2.79×10-2	-0.78	-0.08	1.05743	-10.6873	CDKN2A|1.86;AIFM1|0.74;SMARCA5|0.7;TOP2A|0.6	4	241	107	38520	http://www.ebi.ac.uk/QuickGO/GTerm?id=GO:0006323
7	6,7	DNA replication	GO:0006260	2.87×10-3	1.99×10-2	-1.21	-0.35	1.05743	-10.6873	S100A11|1.58;CDK1|0.69;DNAJA3|0.69;TOP1|0.68;TOP2A|0.6;SSRP1|0.5	6	503	107	38520	http://www.ebi.ac.uk/QuickGO/GTerm?id=GO:0006260
7	6,7	DNA topological change	GO:0006265	5.57×10-3	2.96×10-2	-0.39	0.16	1.05743	-10.6873	TOP1|0.68;TOP2A|0.6	2	40	107	38520	http://www.ebi.ac.uk/QuickGO/GTerm?id=GO:0006265
7	7	DNA-templated transcription, initiation	GO:0006352	2.99×10-2	8.34×10-2	-0.73	-0.06	1.05743	-10.6873	GTF2F1|1.8;GLS|0.72;SMARCA5|0.7;PARP1|0.66	4	420	107	38520	http://www.ebi.ac.uk/QuickGO/GTerm?id=GO:0006352
7	4,6,7	establishment of protein localization to mitochondrial membrane	GO:0090151	2.47×10-2	7.44×10-2	0	0.4	1.05743	-10.6873	NDUFA13|0.7	1	9	107	38520	http://www.ebi.ac.uk/QuickGO/GTerm?id=GO:0090151
7	5,6,7	establishment of protein localization to organelle	GO:0072594	2.02×10-2	6.58×10-2	-1	-0.22	1.05743	-10.6873	SRI|1.57;DDOST|0.74;NDUFA13|0.7;SEC62|0.68;PHB2|0.67;PARP1|0.66	6	766	107	38520	http://www.ebi.ac.uk/QuickGO/GTerm?id=GO:0072594
7	6,7	establishment of protein localization to plasma membrane	GO:0090002	6.54×10-3	3.35×10-2	-0.22	0.26	1.05743	-10.6873	CLIP1|1.66;BSG|0.73;ATP1B1|0.69	3	136	107	38520	http://www.ebi.ac.uk/QuickGO/GTerm?id=GO:0090002
7	4,7	execution phase of apoptosis	GO:0097194	4.73×10-3	2.81×10-2	-0.2	0.27	1.05743	-10.6873	DBNL|1.6;AIFM1|0.74;TOP2A|0.6	3	121	107	38520	http://www.ebi.ac.uk/QuickGO/GTerm?id=GO:0097194
7	7	fatty acid beta-oxidation	GO:0006635	8.40×10-4	9.91×10-3	-0.54	0.06	1.05743	-10.6873	MUT|0.74;ECH1|0.72;HSD17B4|0.54	3	66	107	38520	http://www.ebi.ac.uk/QuickGO/GTerm?id=GO:0006635
7	7	fatty acid elongation	GO:0030497	3.28×10-2	8.77×10-2	0	0.4	1.05743	-10.6873	TECR|0.74	1	12	107	38520	http://www.ebi.ac.uk/QuickGO/GTerm?id=GO:0030497
7	6,7	fatty acid oxidation	GO:0019395	2.19×10-3	1.75×10-2	-0.54	0.06	1.05743	-10.6873	MUT|0.74;ECH1|0.72;HSD17B4|0.54	3	92	107	38520	http://www.ebi.ac.uk/QuickGO/GTerm?id=GO:0019395
7	6,7	fatty-acyl-CoA metabolic process	GO:0035337	1.07×10-4	2.18×10-3	-0.53	0.07	1.05743	-10.6873	SLC25A1|0.74;TECR|0.74;HSD17B4|0.54	3	33	107	38520	http://www.ebi.ac.uk/QuickGO/GTerm?id=GO:0035337
7	7	G1 DNA damage checkpoint	GO:0044783	2.20×10-2	6.88×10-2	0.48	0.7	1.05743	-10.6873	PSMA1|1.74;GIGYF2|1.72	2	82	107	38520	http://www.ebi.ac.uk/QuickGO/GTerm?id=GO:0044783
7	7	G1/S transition of mitotic cell cycle	GO:0000082	1.00×10-3	1.09×10-2	0.29	0.58	1.05743	-10.6873	CDKN2A|1.86;PSMA1|1.74;GIGYF2|1.72;SMARCA4|0.74;CDK1|0.69	5	272	107	38520	http://www.ebi.ac.uk/QuickGO/GTerm?id=GO:0000082
7	7	gliogenesis	GO:0042063	4.33×10-3	2.64×10-2	-0.73	-0.06	1.05743	-10.6873	NDRG1|1.88;HDAC2|0.73;CSPG4|0.69;CDK1|0.69	4	236	107	38520	http://www.ebi.ac.uk/QuickGO/GTerm?id=GO:0042063
7	7	glucose metabolic process	GO:0006006	6.00×10-3	3.16×10-2	-0.6	0.03	1.05743	-10.6873	SLC25A1|0.74;PDHA1|0.74;MDH2|0.68;PDHB|0.67	4	259	107	38520	http://www.ebi.ac.uk/QuickGO/GTerm?id=GO:0006006
7	7	glycosaminoglycan catabolic process	GO:0006027	8.40×10-4	9.91×10-3	-0.63	0.01	1.05743	-10.6873	GNS|0.73;CSPG4|0.69;CD44|0.47	3	66	107	38520	http://www.ebi.ac.uk/QuickGO/GTerm?id=GO:0006027
7	7	heart contraction	GO:0060047	1.97×10-2	6.46×10-2	-0.2	0.28	1.05743	-10.6873	SRI|1.57;ATP1B1|0.69;ASPH|0.63	3	205	107	38520	http://www.ebi.ac.uk/QuickGO/GTerm?id=GO:0060047
7	7	hemidesmosome assembly	GO:0031581	3.82×10-2	9.50×10-2	0	0.4	1.05743	-10.6873	ITGB4|0.65	1	14	107	38520	http://www.ebi.ac.uk/QuickGO/GTerm?id=GO:0031581
7	7	heterochromatin assembly	GO:0031507	4.62×10-2	1.05×10-1	0	0.4	1.05743	-10.6873	CDKN2A|1.86	1	17	107	38520	http://www.ebi.ac.uk/QuickGO/GTerm?id=GO:0031507
7	7	hexose biosynthetic process	GO:0019319	4.55×10-2	1.05×10-1	-0.3	0.22	1.05743	-10.6873	SLC25A1|0.74;MDH2|0.68	2	122	107	38520	http://www.ebi.ac.uk/QuickGO/GTerm?id=GO:0019319
7	6,7	inner mitochondrial membrane organization	GO:0007007	4.62×10-2	1.05×10-1	0	0.4	1.05743	-10.6873	NDUFA13|0.7	1	17	107	38520	http://www.ebi.ac.uk/QuickGO/GTerm?id=GO:0007007
7	7	inorganic ion homeostasis	GO:0098771	5.06×10-3	2.94×10-2	-1.21	-0.35	1.05743	-10.6873	SRI|1.57;SFXN3|0.74;ATP6V0D1|0.74;CYBA|0.7;ATP1B1|0.69;ASPH|0.63;ERO1L|0.58	7	751	107	38520	http://www.ebi.ac.uk/QuickGO/GTerm?id=GO:0098771
7	6,7	intracellular protein transport	GO:0006886	9.53×10-3	4.12×10-2	-1.87	-0.77	1.05743	-10.6873	CLIP1|1.66;SRI|1.57;DDOST|0.74;BSG|0.73;HM13|0.71;NDUFA13|0.7;ATP1B1|0.69;SEC62|0.68;PHB2|0.67;PARP1|0.66;ASPH|0.63	11	1752	107	38520	http://www.ebi.ac.uk/QuickGO/GTerm?id=GO:0006886
7	6,7	intrinsic apoptotic signaling pathway	GO:0097193	4.07×10-6	1.81×10-4	-1.55	-0.56	1.05743	-10.6873	TMEM109|1.61;UBE2K|1.53;AIFM1|0.74;YBX3|0.72;NDUFA13|0.7;HYOU1|0.69;ERO1L|0.58;CD44|0.47	8	329	107	38520	http://www.ebi.ac.uk/QuickGO/GTerm?id=GO:0097193
7	7	intrinsic apoptotic signaling pathway in response to DNA damage by p53 class mediator	GO:0042771	8.58×10-3	3.83×10-2	0.12	0.48	1.05743	-10.6873	TMEM109|1.61;CD44|0.47	2	50	107	38520	http://www.ebi.ac.uk/QuickGO/GTerm?id=GO:0042771
7	6,7	IRE1-mediated unfolded protein response	GO:0036498	3.34×10-5	9.05×10-4	-0.65	0	1.05743	-10.6873	ATP6V0D1|0.74;HYOU1|0.69;SEC62|0.68;MYDGF|0.65	4	65	107	38520	http://www.ebi.ac.uk/QuickGO/GTerm?id=GO:0036498
7	7	L-amino acid transport	GO:0015807	4.82×10-2	1.08×10-1	-0.41	0.15	1.05743	-10.6873	SLC7A5|0.63;SERINC1|0.62	2	126	107	38520	http://www.ebi.ac.uk/QuickGO/GTerm?id=GO:0015807
7	7	lysine metabolic process	GO:0006553	2.47×10-2	7.44×10-2	0	0.4	1.05743	-10.6873	DLD|0.73	1	9	107	38520	http://www.ebi.ac.uk/QuickGO/GTerm?id=GO:0006553
7	7	mature ribosome assembly	GO:0042256	2.74×10-2	7.92×10-2	0	0.4	1.05743	-10.6873	C1QBP|0.7	1	10	107	38520	http://www.ebi.ac.uk/QuickGO/GTerm?id=GO:0042256
7	7	membrane protein intracellular domain proteolysis	GO:0031293	4.62×10-2	1.05×10-1	0	0.4	1.05743	-10.6873	HM13|0.71	1	17	107	38520	http://www.ebi.ac.uk/QuickGO/GTerm?id=GO:0031293
7	6,7	membrane protein proteolysis involved in retrograde protein transport, ER to cytosol	GO:1904211	5.55×10-3	2.96×10-2	0	0.4	1.05743	-10.6873	HM13|0.71	1	2	107	38520	http://www.ebi.ac.uk/QuickGO/GTerm?id=GO:1904211
7	7	membrane repolarization during cardiac muscle cell action potential	GO:0086013	2.47×10-2	7.44×10-2	0	0.4	1.05743	-10.6873	ATP1B1|0.69	1	9	107	38520	http://www.ebi.ac.uk/QuickGO/GTerm?id=GO:0086013
7	6,7	microtubule polymerization or depolymerization	GO:0031109	4.84×10-3	2.85×10-2	0.15	0.49	1.05743	-10.6873	STMN1|1.67;CLIP1|1.66;KIF2A|0.71	3	122	107	38520	http://www.ebi.ac.uk/QuickGO/GTerm?id=GO:0031109
7	6,7	mitochondrial DNA metabolic process	GO:0032042	2.20×10-3	1.75×10-2	-0.34	0.19	1.05743	-10.6873	DNAJA3|0.69;PARP1|0.66	2	25	107	38520	http://www.ebi.ac.uk/QuickGO/GTerm?id=GO:0032042
7	5,6,7	mitochondrial mRNA processing	GO:0090615	2.78×10-3	1.95×10-2	0	0.4	1.05743	-10.6873	PNPT1|0.69	1	1	107	38520	http://www.ebi.ac.uk/QuickGO/GTerm?id=GO:0090615
7	5,6,7	mitochondrial RNA 3'-end processing	GO:0000965	8.31×10-3	3.76×10-2	0	0.4	1.05743	-10.6873	PNPT1|0.69	1	3	107	38520	http://www.ebi.ac.uk/QuickGO/GTerm?id=GO:0000965
7	5,6,7	mitochondrial RNA 5'-end processing	GO:0000964	5.55×10-3	2.96×10-2	0	0.4	1.05743	-10.6873	PNPT1|0.69	1	2	107	38520	http://www.ebi.ac.uk/QuickGO/GTerm?id=GO:0000964
7	6,7	mitotic DNA damage checkpoint	GO:0044773	5.53×10-3	2.96×10-2	0.16	0.5	1.05743	-10.6873	PSMA1|1.74;GIGYF2|1.72;CDK1|0.69	3	128	107	38520	http://www.ebi.ac.uk/QuickGO/GTerm?id=GO:0044773
7	7	monocarboxylic acid biosynthetic process	GO:0072330	5.16×10-3	2.96×10-2	-0.72	-0.05	1.05743	-10.6873	TECR|0.74;CSPG4|0.69;ERLIN1|0.69;HSD17B4|0.54	4	248	107	38520	http://www.ebi.ac.uk/QuickGO/GTerm?id=GO:0072330
7	7	monocarboxylic acid catabolic process	GO:0072329	3.72×10-3	2.40×10-2	-0.54	0.06	1.05743	-10.6873	MUT|0.74;ECH1|0.72;HSD17B4|0.54	3	111	107	38520	http://www.ebi.ac.uk/QuickGO/GTerm?id=GO:0072329
7	7	monocarboxylic acid metabolic process	GO:0032787	1.64×10-6	8.96×10-5	-2	-0.85	1.05743	-10.6873	TECR|0.74;MUT|0.74;PDHA1|0.74;BSG|0.73;DLD|0.73;ECH1|0.72;CSPG4|0.69;ERLIN1|0.69;PDHB|0.67;MCCC2|0.64;ERO1L|0.58;HSD17B4|0.54	12	770	107	38520	http://www.ebi.ac.uk/QuickGO/GTerm?id=GO:0032787
7	6,7	mRNA metabolic process	GO:0016071	8.94×10-3	3.93×10-2	-1.3	-0.41	1.05743	-10.6873	GTF2F1|1.8;SRRM1|1.69;C1QBP|0.7;PNPT1|0.69;HNRNPR|0.69;USP39|0.69;FUS|0.67	7	837	107	38520	http://www.ebi.ac.uk/QuickGO/GTerm?id=GO:0016071
7	7	mucopolysaccharide metabolic process	GO:1903510	7.36×10-3	3.62×10-2	-0.63	0.01	1.05743	-10.6873	GNS|0.73;CSPG4|0.69;CD44|0.47	3	142	107	38520	http://www.ebi.ac.uk/QuickGO/GTerm?id=GO:1903510
7	5,6,7	negative regulation of alcohol biosynthetic process	GO:1902931	1.01×10-3	1.09×10-2	-0.29	0.22	1.05743	-10.6873	LPCAT1|0.74;ERLIN1|0.69	2	17	107	38520	http://www.ebi.ac.uk/QuickGO/GTerm?id=GO:1902931
7	6,7	negative regulation of apoptotic process	GO:0043066	5.88×10-5	1.41×10-3	-1.98	-0.84	1.05743	-10.6873	PSMA1|1.74;ITGA5|0.73;HDAC2|0.73;YBX3|0.72;NDUFA13|0.7;CDK1|0.69;DNAJA3|0.69;HYOU1|0.69;PHB2|0.67;MYDGF|0.65;CD44|0.47	11	932	107	38520	http://www.ebi.ac.uk/QuickGO/GTerm?id=GO:0043066
7	6,7	negative regulation of fatty acid biosynthetic process	GO:0045717	3.28×10-2	8.77×10-2	0	0.4	1.05743	-10.6873	ERLIN1|0.69	1	12	107	38520	http://www.ebi.ac.uk/QuickGO/GTerm?id=GO:0045717
7	6,7	negative regulation of gene expression, epigenetic	GO:0045814	4.55×10-2	1.05×10-1	-0.29	0.22	1.05743	-10.6873	HDAC2|0.73;SMARCA5|0.7	2	122	107	38520	http://www.ebi.ac.uk/QuickGO/GTerm?id=GO:0045814
7	5,6,7	negative regulation of interleukin-12 production	GO:0032695	4.09×10-2	9.87×10-2	0	0.4	1.05743	-10.6873	C1QBP|0.7	1	15	107	38520	http://www.ebi.ac.uk/QuickGO/GTerm?id=GO:0032695
7	5,6,7	negative regulation of intracellular signal transduction	GO:1902532	2.09×10-3	1.71×10-2	-1.1	-0.29	1.05743	-10.6873	YBX3|0.72;C1QBP|0.7;NDUFA13|0.7;DNAJA3|0.69;HYOU1|0.69;CD44|0.47	6	472	107	38520	http://www.ebi.ac.uk/QuickGO/GTerm?id=GO:1902532
7	6,7	negative regulation of intrinsic apoptotic signaling pathway in response to osmotic stress	GO:1902219	1.11×10-2	4.47×10-2	0	0.4	1.05743	-10.6873	YBX3|0.72	1	4	107	38520	http://www.ebi.ac.uk/QuickGO/GTerm?id=GO:1902219
7	6,7	negative regulation of MHC class II biosynthetic process	GO:0045347	1.66×10-2	5.78×10-2	0	0.4	1.05743	-10.6873	HDAC2|0.73	1	6	107	38520	http://www.ebi.ac.uk/QuickGO/GTerm?id=GO:0045347
7	5,6,7	negative regulation of mitotic cell cycle	GO:0045930	2.08×10-5	6.23×10-4	-1.3	-0.41	1.05743	-10.6873	PSMA1|1.74;GIGYF2|1.72;SMARCA4|0.74;TRRAP|0.72;CDK1|0.69;AURKAIP1|0.68;TOP2A|0.6	7	298	107	38520	http://www.ebi.ac.uk/QuickGO/GTerm?id=GO:0045930
7	7	negative regulation of nucleic acid-templated transcription	GO:1903507	5.28×10-3	2.96×10-2	-1.66	-0.63	1.05743	-10.6873	CDKN2A|1.86;SMARCA4|0.74;HDAC2|0.73;YBX3|0.72;C1QBP|0.7;SMARCA5|0.7;NDUFA13|0.7;DNAJA3|0.69;PHB2|0.67;PARP1|0.66	10	1386	107	38520	http://www.ebi.ac.uk/QuickGO/GTerm?id=GO:1903507
7	5,6,7	negative regulation of phospholipid metabolic process	GO:1903726	2.20×10-2	6.88×10-2	0	0.4	1.05743	-10.6873	LPCAT1|0.74	1	8	107	38520	http://www.ebi.ac.uk/QuickGO/GTerm?id=GO:1903726
7	5,6,7	negative regulation of RNA metabolic process	GO:0051253	7.34×10-3	3.62×10-2	-1.66	-0.63	1.05743	-10.6873	CDKN2A|1.86;SMARCA4|0.74;HDAC2|0.73;YBX3|0.72;C1QBP|0.7;SMARCA5|0.7;NDUFA13|0.7;DNAJA3|0.69;PHB2|0.67;PARP1|0.66	10	1455	107	38520	http://www.ebi.ac.uk/QuickGO/GTerm?id=GO:0051253
7	4,5,6,7	negative regulation of signal transduction	GO:0009968	7.37×10-3	3.62×10-2	-1.65	-0.63	1.05743	-10.6873	PSMA1|1.74;SMARCA4|0.74;YBX3|0.72;C1QBP|0.7;NDUFA13|0.7;DNAJA3|0.69;HYOU1|0.69;PHB2|0.67;CD44|0.47	9	1230	107	38520	http://www.ebi.ac.uk/QuickGO/GTerm?id=GO:0009968
7	6,7	negative regulation of skeletal muscle tissue development	GO:0048642	3.28×10-2	8.77×10-2	0	0.4	1.05743	-10.6873	YBX3|0.72	1	12	107	38520	http://www.ebi.ac.uk/QuickGO/GTerm?id=GO:0048642
7	7	negative regulation of transcription regulatory region DNA binding	GO:2000678	4.88×10-2	1.08×10-1	0	0.4	1.05743	-10.6873	SRI|1.57	1	18	107	38520	http://www.ebi.ac.uk/QuickGO/GTerm?id=GO:2000678
7	7	neuron intrinsic apoptotic signaling pathway in response to endoplasmic reticulum stress	GO:0036483	5.55×10-3	2.96×10-2	0	0.4	1.05743	-10.6873	HYOU1|0.69	1	2	107	38520	http://www.ebi.ac.uk/QuickGO/GTerm?id=GO:0036483
7	5,6,7	neuron projection development	GO:0031175	2.99×10-2	8.34×10-2	-0.61	0.02	1.05743	-10.6873	STMN1|1.67;DBNL|1.6;S100A6|1.52;ALCAM|0.73;ITGA5|0.73;HDAC2|0.73;CDK1|0.69	7	1070	107	38520	http://www.ebi.ac.uk/QuickGO/GTerm?id=GO:0031175
7	7	neutral amino acid transport	GO:0015804	2.00×10-2	6.53×10-2	-0.41	0.15	1.05743	-10.6873	SLC7A5|0.63;SERINC1|0.62	2	78	107	38520	http://www.ebi.ac.uk/QuickGO/GTerm?id=GO:0015804
7	6,7	nuclear envelope disassembly	GO:0051081	6.70×10-3	3.39×10-2	-0.32	0.2	1.05743	-10.6873	NUP210|0.69;CDK1|0.69	2	44	107	38520	http://www.ebi.ac.uk/QuickGO/GTerm?id=GO:0051081
7	7	nucleic acid transport	GO:0050657	2.42×10-2	7.42×10-2	-0.23	0.26	1.05743	-10.6873	SRRM1|1.69;NUP210|0.69;PNPT1|0.69	3	222	107	38520	http://www.ebi.ac.uk/QuickGO/GTerm?id=GO:0050657
7	7	nucleocytoplasmic transport	GO:0006913	2.57×10-3	1.94×10-2	-0.1	0.34	1.05743	-10.6873	SRRM1|1.69;SRI|1.57;PPP1R12A|1.54;LSG1|0.7;PHB2|0.67;PARP1|0.66	6	492	107	38520	http://www.ebi.ac.uk/QuickGO/GTerm?id=GO:0006913
7	5,6,7	nucleosome disassembly	GO:0006337	4.62×10-2	1.05×10-1	0	0.4	1.05743	-10.6873	SMARCA4|0.74	1	17	107	38520	http://www.ebi.ac.uk/QuickGO/GTerm?id=GO:0006337
7	7	nucleosome positioning	GO:0016584	2.20×10-2	6.88×10-2	0	0.4	1.05743	-10.6873	SMARCA5|0.7	1	8	107	38520	http://www.ebi.ac.uk/QuickGO/GTerm?id=GO:0016584
7	5,7	oxidative phosphorylation	GO:0006119	3.59×10-2	9.18×10-2	-0.29	0.22	1.05743	-10.6873	DLD|0.73;NDUFA10|0.71	2	107	107	38520	http://www.ebi.ac.uk/QuickGO/GTerm?id=GO:0006119
7	6,7	peptide biosynthetic process	GO:0043043	8.92×10-4	1.02×10-2	-1.74	-0.69	1.05743	-10.6873	GIGYF2|1.72;DDOST|0.74;MRPL21|0.74;MRPL54|0.72;NARS2|0.72;YBX3|0.72;TUFM|0.71;C1QBP|0.7;CARS2|0.7;AURKAIP1|0.68;LARS2|0.64	11	1282	107	38520	http://www.ebi.ac.uk/QuickGO/GTerm?id=GO:0043043
7	7	peptidyl-amino acid modification	GO:0018193	4.69×10-4	6.22×10-3	-2.36	-1.07	1.05743	-10.6873	DDOST|0.74;FKBP10|0.73;ITGA5|0.73;STT3A|0.73;HDAC2|0.73;TRRAP|0.72;MLEC|0.71;CSPG4|0.69;NUP210|0.69;CDK1|0.69;PARP1|0.66;GANAB|0.64;ASPH|0.63;CD44|0.47	14	1801	107	38520	http://www.ebi.ac.uk/QuickGO/GTerm?id=GO:0018193
7	7	phosphatidylglycerol biosynthetic process	GO:0006655	4.09×10-2	9.87×10-2	0	0.4	1.05743	-10.6873	PTPMT1|0.71	1	15	107	38520	http://www.ebi.ac.uk/QuickGO/GTerm?id=GO:0006655
7	7	phosphatidylglycerol metabolic process	GO:0046471	6.41×10-3	3.31×10-2	-0.28	0.23	1.05743	-10.6873	LPCAT1|0.74;PTPMT1|0.71	2	43	107	38520	http://www.ebi.ac.uk/QuickGO/GTerm?id=GO:0046471
7	5,6,7	phosphorylated carbohydrate dephosphorylation	GO:0046838	4.09×10-2	9.87×10-2	0	0.4	1.05743	-10.6873	PTPMT1|0.71	1	15	107	38520	http://www.ebi.ac.uk/QuickGO/GTerm?id=GO:0046838
7	6,7	podosome assembly	GO:0071800	4.35×10-2	1.01×10-1	0	0.4	1.05743	-10.6873	DBNL|1.6	1	16	107	38520	http://www.ebi.ac.uk/QuickGO/GTerm?id=GO:0071800
7	6,7	positive regulation of apoptotic process	GO:0043065	1.06×10-2	4.47×10-2	-1.09	-0.28	1.05743	-10.6873	CDKN2A|1.86;AIFM1|0.74;C1QBP|0.7;NDUFA13|0.7;DNAJA3|0.69;TOP2A|0.6	6	663	107	38520	http://www.ebi.ac.uk/QuickGO/GTerm?id=GO:0043065
7	6,7	positive regulation of calcium ion transmembrane transport	GO:1904427	5.30×10-3	2.96×10-2	-0.36	0.18	1.05743	-10.6873	ATP1B1|0.69;ASPH|0.63	2	39	107	38520	http://www.ebi.ac.uk/QuickGO/GTerm?id=GO:1904427
7	6,7	positive regulation of calcium ion transmembrane transporter activity	GO:1901021	5.30×10-3	2.96×10-2	-0.36	0.18	1.05743	-10.6873	ATP1B1|0.69;ASPH|0.63	2	39	107	38520	http://www.ebi.ac.uk/QuickGO/GTerm?id=GO:1901021
7	6,7	positive regulation of cation channel activity	GO:2001259	7.00×10-3	3.50×10-2	-0.36	0.18	1.05743	-10.6873	CTSS|0.7;ASPH|0.63	2	45	107	38520	http://www.ebi.ac.uk/QuickGO/GTerm?id=GO:2001259
7	6,7	positive regulation of CDP-diacylglycerol-serine O-phosphatidyltransferase activity	GO:1904219	5.55×10-3	2.96×10-2	0	0.4	1.05743	-10.6873	SERINC1|0.62	1	2	107	38520	http://www.ebi.ac.uk/QuickGO/GTerm?id=GO:1904219
7	6,7	positive regulation of cell cycle checkpoint	GO:1901978	2.47×10-2	7.44×10-2	0	0.4	1.05743	-10.6873	NDRG1|1.88	1	9	107	38520	http://www.ebi.ac.uk/QuickGO/GTerm?id=GO:1901978
7	5,6,7	positive regulation of cellular amide metabolic process	GO:0034250	3.29×10-2	8.77×10-2	-0.3	0.22	1.05743	-10.6873	YBX3|0.72;C1QBP|0.7	2	102	107	38520	http://www.ebi.ac.uk/QuickGO/GTerm?id=GO:0034250
7	5,7	positive regulation of cytoplasmic transport	GO:1903651	3.41×10-2	8.99×10-2	-0.2	0.28	1.05743	-10.6873	SRI|1.57;PARP1|0.66;ASPH|0.63	3	254	107	38520	http://www.ebi.ac.uk/QuickGO/GTerm?id=GO:1903651
7	6,7	positive regulation of dendritic cell chemotaxis	GO:2000510	1.93×10-2	6.37×10-2	0	0.4	1.05743	-10.6873	C1QBP|0.7	1	7	107	38520	http://www.ebi.ac.uk/QuickGO/GTerm?id=GO:2000510
7	6,7	positive regulation of heterotypic cell-cell adhesion	GO:0034116	3.01×10-2	8.34×10-2	0	0.4	1.05743	-10.6873	CD44|0.47	1	11	107	38520	http://www.ebi.ac.uk/QuickGO/GTerm?id=GO:0034116
7	4,6,7	positive regulation of ion transport	GO:0043270	4.27×10-3	2.61×10-2	-0.71	-0.04	1.05743	-10.6873	SRI|1.57;CTSS|0.7;ATP1B1|0.69;ASPH|0.63	4	235	107	38520	http://www.ebi.ac.uk/QuickGO/GTerm?id=GO:0043270
7	5,6,7	positive regulation of macromolecule biosynthetic process	GO:0010557	2.28×10-3	1.78×10-2	-2.43	-1.12	1.05743	-10.6873	GTF2F1|1.8;PPP1R12A|1.54;SMARCA4|0.74;HDAC2|0.73;YBX3|0.72;C1QBP|0.7;ERLIN1|0.69;PHB2|0.67;PARP1|0.66;MYDGF|0.65;ASPH|0.63;TOP2A|0.6;SSRP1|0.5	13	1892	107	38520	http://www.ebi.ac.uk/QuickGO/GTerm?id=GO:0010557
7	6,7	positive regulation of peptidase activity	GO:0010952	2.48×10-4	3.97×10-3	-0.82	-0.11	1.05743	-10.6873	AIFM1|0.74;NDUFA13|0.7;DNAJA3|0.69;CLPX|0.67;ASPH|0.63	5	200	107	38520	http://www.ebi.ac.uk/QuickGO/GTerm?id=GO:0010952
7	5,6,7	positive regulation of phosphorus metabolic process	GO:0010562	9.38×10-3	4.06×10-2	-1.72	-0.67	1.05743	-10.6873	SLK|1.69;DBNL|1.6;ITGA5|0.73;HDAC2|0.73;CSPG4|0.69;CDK1|0.69;PHB2|0.67;MYDGF|0.65;CD44|0.47	9	1279	107	38520	http://www.ebi.ac.uk/QuickGO/GTerm?id=GO:0010562
7	6,7	positive regulation of potassium ion transmembrane transporter activity	GO:1901018	4.09×10-2	9.87×10-2	0	0.4	1.05743	-10.6873	ATP1B1|0.69	1	15	107	38520	http://www.ebi.ac.uk/QuickGO/GTerm?id=GO:1901018
7	6,7	positive regulation of protein modification process	GO:0031401	1.18×10-3	1.20×10-2	-2.12	-0.92	1.05743	-10.6873	PSMA1|1.74;SLK|1.69;DBNL|1.6;ITGA5|0.73;HDAC2|0.73;CSPG4|0.69;CDK1|0.69;DNAJA3|0.69;PHB2|0.67;MYDGF|0.65;CD44|0.47	11	1328	107	38520	http://www.ebi.ac.uk/QuickGO/GTerm?id=GO:0031401
7	6,7	positive regulation of RNA biosynthetic process	GO:1902680	7.76×10-3	3.75×10-2	-2.14	-0.93	1.05743	-10.6873	GTF2F1|1.8;PPP1R12A|1.54;SMARCA4|0.74;HDAC2|0.73;ERLIN1|0.69;PHB2|0.67;PARP1|0.66;MYDGF|0.65;ASPH|0.63;TOP2A|0.6;SSRP1|0.5	11	1702	107	38520	http://www.ebi.ac.uk/QuickGO/GTerm?id=GO:1902680
7	5,6,7	positive regulation of RNA metabolic process	GO:0051254	3.32×10-3	2.21×10-2	-2.3	-1.03	1.05743	-10.6873	GTF2F1|1.8;PPP1R12A|1.54;SMARCA4|0.74;HDAC2|0.73;ERLIN1|0.69;PNPT1|0.69;PHB2|0.67;PARP1|0.66;MYDGF|0.65;ASPH|0.63;TOP2A|0.6;SSRP1|0.5	12	1743	107	38520	http://www.ebi.ac.uk/QuickGO/GTerm?id=GO:0051254
7	6,7	positive regulation of serine C-palmitoyltransferase activity	GO:1904222	5.55×10-3	2.96×10-2	0	0.4	1.05743	-10.6873	SERINC1|0.62	1	2	107	38520	http://www.ebi.ac.uk/QuickGO/GTerm?id=GO:1904222
7	4,5,6,7	positive regulation of signal transduction	GO:0009967	3.41×10-4	4.99×10-3	-2.35	-1.07	1.05743	-10.6873	PSMA1|1.74;DBNL|1.6;SMARCA4|0.74;ITGA5|0.73;HDAC2|0.73;C1QBP|0.7;CYBA|0.7;CSPG4|0.69;CDK1|0.69;PHB2|0.67;PARP1|0.66;MYDGF|0.65;CD44|0.47	13	1536	107	38520	http://www.ebi.ac.uk/QuickGO/GTerm?id=GO:0009967
7	6,7	positive regulation of sodium ion transmembrane transporter activity	GO:2000651	3.82×10-2	9.50×10-2	0	0.4	1.05743	-10.6873	ATP1B1|0.69	1	14	107	38520	http://www.ebi.ac.uk/QuickGO/GTerm?id=GO:2000651
7	7	positive regulation of spindle checkpoint	GO:0090232	1.93×10-2	6.37×10-2	0	0.4	1.05743	-10.6873	NDRG1|1.88	1	7	107	38520	http://www.ebi.ac.uk/QuickGO/GTerm?id=GO:0090232
7	7	positive regulation of transcription regulatory region DNA binding	GO:2000679	2.74×10-2	7.92×10-2	0	0.4	1.05743	-10.6873	PARP1|0.66	1	10	107	38520	http://www.ebi.ac.uk/QuickGO/GTerm?id=GO:2000679
7	4,6,7	positive regulation of trophoblast cell migration	GO:1901165	8.31×10-3	3.76×10-2	0	0.4	1.05743	-10.6873	C1QBP|0.7	1	3	107	38520	http://www.ebi.ac.uk/QuickGO/GTerm?id=GO:1901165
7	6,7	positive regulation of ubiquitin-protein transferase activity	GO:0051443	2.56×10-2	7.64×10-2	-0.08	0.35	1.05743	-10.6873	PSMA1|1.74;CDK1|0.69	2	89	107	38520	http://www.ebi.ac.uk/QuickGO/GTerm?id=GO:0051443
7	6,7	posttranscriptional regulation of gene expression	GO:0010608	4.35×10-2	1.01×10-1	-0.73	-0.05	1.05743	-10.6873	GIGYF2|1.72;YBX3|0.72;C1QBP|0.7;LARS2|0.64	4	474	107	38520	http://www.ebi.ac.uk/QuickGO/GTerm?id=GO:0010608
7	7	post-translational protein modification	GO:0043687	6.29×10-4	7.86×10-3	-0.95	-0.19	1.05743	-10.6873	DDOST|0.74;STT3A|0.73;MLEC|0.71;NUP210|0.69;PARP1|0.66;GANAB|0.64	6	373	107	38520	http://www.ebi.ac.uk/QuickGO/GTerm?id=GO:0043687
7	6,7	prenylcysteine catabolic process	GO:0030328	2.20×10-2	6.88×10-2	0	0.4	1.05743	-10.6873	PCYOX1|0.61	1	8	107	38520	http://www.ebi.ac.uk/QuickGO/GTerm?id=GO:0030328
7	6,7	pronuclear fusion	GO:0007344	2.78×10-3	1.95×10-2	0	0.4	1.05743	-10.6873	CDK1|0.69	1	1	107	38520	http://www.ebi.ac.uk/QuickGO/GTerm?id=GO:0007344
7	7	protein acylation	GO:0043543	3.86×10-2	9.53×10-2	-0.45	0.12	1.05743	-10.6873	HDAC2|0.73;TRRAP|0.72;MDH2|0.68	3	267	107	38520	http://www.ebi.ac.uk/QuickGO/GTerm?id=GO:0043543
7	7	protein autoprocessing	GO:0016540	3.28×10-2	8.77×10-2	0	0.4	1.05743	-10.6873	PARP1|0.66	1	12	107	38520	http://www.ebi.ac.uk/QuickGO/GTerm?id=GO:0016540
7	4,7	protein glycosylation	GO:0006486	9.18×10-3	4.00×10-2	-0.79	-0.09	1.05743	-10.6873	DDOST|0.74;STT3A|0.73;MLEC|0.71;PARP1|0.66;GANAB|0.64	5	458	107	38520	http://www.ebi.ac.uk/QuickGO/GTerm?id=GO:0006486
7	5,6,7	protein import	GO:0017038	1.56×10-2	5.68×10-2	-0.71	-0.04	1.05743	-10.6873	SRI|1.57;NDUFA13|0.7;PHB2|0.67;PARP1|0.66	4	343	107	38520	http://www.ebi.ac.uk/QuickGO/GTerm?id=GO:0017038
7	6,7	protein localization to membrane raft	GO:1903044	2.72×10-4	4.16×10-3	-0.06	0.37	1.05743	-10.6873	CLIP1|1.66;ATP1B1|0.69	2	9	107	38520	http://www.ebi.ac.uk/QuickGO/GTerm?id=GO:1903044
7	6,7	protein localization to plasma membrane	GO:0072659	3.31×10-2	8.81×10-2	-0.22	0.26	1.05743	-10.6873	CLIP1|1.66;BSG|0.73;ATP1B1|0.69	3	251	107	38520	http://www.ebi.ac.uk/QuickGO/GTerm?id=GO:0072659
7	6,7	protein maturation by protein folding	GO:0022417	2.47×10-2	7.44×10-2	0	0.4	1.05743	-10.6873	ERO1L|0.58	1	9	107	38520	http://www.ebi.ac.uk/QuickGO/GTerm?id=GO:0022417
7	6,7	protein oligomerization	GO:0051259	4.16×10-2	9.98×10-2	-0.59	0.03	1.05743	-10.6873	OAT|0.73;GLS|0.72;HM13|0.71;PNPT1|0.69	4	467	107	38520	http://www.ebi.ac.uk/QuickGO/GTerm?id=GO:0051259
7	6,7	protein targeting	GO:0006605	1.05×10-2	4.43×10-2	-1.14	-0.31	1.05743	-10.6873	SRI|1.57;DDOST|0.74;BSG|0.73;NDUFA13|0.7;SEC62|0.68;PHB2|0.67;PARP1|0.66	7	863	107	38520	http://www.ebi.ac.uk/QuickGO/GTerm?id=GO:0006605
7	6,7	protein targeting to membrane	GO:0006612	3.37×10-2	8.95×10-2	-0.43	0.13	1.05743	-10.6873	DDOST|0.74;BSG|0.73;SEC62|0.68	3	253	107	38520	http://www.ebi.ac.uk/QuickGO/GTerm?id=GO:0006612
7	6,7	protein transport into membrane raft	GO:0032596	1.14×10-4	2.29×10-3	-0.06	0.37	1.05743	-10.6873	CLIP1|1.66;ATP1B1|0.69	2	6	107	38520	http://www.ebi.ac.uk/QuickGO/GTerm?id=GO:0032596
7	5,6,7	protein transport within lipid bilayer	GO:0032594	1.59×10-4	2.92×10-3	-0.06	0.37	1.05743	-10.6873	CLIP1|1.66;ATP1B1|0.69	2	7	107	38520	http://www.ebi.ac.uk/QuickGO/GTerm?id=GO:0032594
7	6,7	proteolysis involved in cellular protein catabolic process	GO:0051603	1.83×10-2	6.20×10-2	-1.45	-0.5	1.05743	-10.6873	PSMA1|1.74;UBE2K|1.53;CTSS|0.7;ERLIN1|0.69;CDK1|0.69;USP39|0.69;CLPX|0.67;PCYOX1|0.61	8	1194	107	38520	http://www.ebi.ac.uk/QuickGO/GTerm?id=GO:0051603
7	7	purine nucleoside monophosphate metabolic process	GO:0009126	2.84×10-2	8.13×10-2	-0.56	0.05	1.05743	-10.6873	PDHA1|0.74;DLD|0.73;ATP5L|0.72;NDUFA10|0.71	4	413	107	38520	http://www.ebi.ac.uk/QuickGO/GTerm?id=GO:0009126
7	7	purine nucleoside triphosphate metabolic process	GO:0009144	2.79×10-2	8.04×10-2	-0.56	0.05	1.05743	-10.6873	PDHA1|0.74;DLD|0.73;ATP5L|0.72;NDUFA10|0.71	4	411	107	38520	http://www.ebi.ac.uk/QuickGO/GTerm?id=GO:0009144
7	7	purine ribonucleoside metabolic process	GO:0046128	1.58×10-2	5.73×10-2	-0.75	-0.07	1.05743	-10.6873	PDHA1|0.74;DLD|0.73;ATP5L|0.72;NDUFA10|0.71;MCCC2|0.64	5	525	107	38520	http://www.ebi.ac.uk/QuickGO/GTerm?id=GO:0046128
7	6,7	regulation of acute inflammatory response	GO:0002673	2.00×10-2	6.53×10-2	-0.33	0.2	1.05743	-10.6873	C1QBP|0.7;PHB2|0.67	2	78	107	38520	http://www.ebi.ac.uk/QuickGO/GTerm?id=GO:0002673
7	6,7	regulation of acyl-CoA biosynthetic process	GO:0050812	5.84×10-6	2.38×10-4	-0.44	0.13	1.05743	-10.6873	PDHA1|0.74;DLD|0.73;PDHB|0.67	3	13	107	38520	http://www.ebi.ac.uk/QuickGO/GTerm?id=GO:0050812
7	5,7	regulation of alcohol biosynthetic process	GO:1902930	6.70×10-3	3.39×10-2	-0.29	0.22	1.05743	-10.6873	LPCAT1|0.74;ERLIN1|0.69	2	44	107	38520	http://www.ebi.ac.uk/QuickGO/GTerm?id=GO:1902930
7	6,7	regulation of apoptotic process	GO:0042981	4.39×10-5	1.11×10-3	-2.99	-1.46	1.05743	-10.6873	CDKN2A|1.86;PSMA1|1.74;SLK|1.69;AIFM1|0.74;ITGA5|0.73;HDAC2|0.73;YBX3|0.72;C1QBP|0.7;NDUFA13|0.7;CDK1|0.69;DNAJA3|0.69;HYOU1|0.69;PHB2|0.67;MYDGF|0.65;TOP2A|0.6;CD44|0.47	16	1824	107	38520	http://www.ebi.ac.uk/QuickGO/GTerm?id=GO:0042981
7	5,6,7	regulation of apoptotic signaling pathway	GO:2001233	2.79×10-2	8.04×10-2	-0.79	-0.09	1.05743	-10.6873	YBX3|0.72;NDUFA13|0.7;HYOU1|0.69;CD44|0.47	4	411	107	38520	http://www.ebi.ac.uk/QuickGO/GTerm?id=GO:2001233
7	5,7	regulation of blood circulation	GO:1903522	3.51×10-2	9.17×10-2	-0.2	0.28	1.05743	-10.6873	SRI|1.57;ATP1B1|0.69;ASPH|0.63	3	257	107	38520	http://www.ebi.ac.uk/QuickGO/GTerm?id=GO:1903522
7	5,6,7	regulation of cell communication by electrical coupling involved in cardiac conduction	GO:1901844	1.93×10-2	6.37×10-2	0	0.4	1.05743	-10.6873	SRI|1.57	1	7	107	38520	http://www.ebi.ac.uk/QuickGO/GTerm?id=GO:1901844
7	7	regulation of cell cycle G1/S phase transition	GO:1902806	1.06×10-3	1.11×10-2	-0.17	0.3	1.05743	-10.6873	PSMA1|1.74;GIGYF2|1.72;SMARCA4|0.74;PHB2|0.67	4	160	107	38520	http://www.ebi.ac.uk/QuickGO/GTerm?id=GO:1902806
7	7	regulation of endopeptidase activity	GO:0052548	4.91×10-3	2.88×10-2	-1.12	-0.3	1.05743	-10.6873	AIFM1|0.74;SERPINH1|0.72;NDUFA13|0.7;DNAJA3|0.69;ASPH|0.63;CD44|0.47	6	562	107	38520	http://www.ebi.ac.uk/QuickGO/GTerm?id=GO:0052548
7	7	regulation of glial cell differentiation	GO:0045685	1.07×10-2	4.47×10-2	-0.3	0.22	1.05743	-10.6873	HDAC2|0.73;CDK1|0.69	2	56	107	38520	http://www.ebi.ac.uk/QuickGO/GTerm?id=GO:0045685
7	5,6,7	regulation of intracellular signal transduction	GO:1902531	2.91×10-3	2.01×10-2	-2.33	-1.05	1.05743	-10.6873	DBNL|1.6;HDAC2|0.73;YBX3|0.72;C1QBP|0.7;NDUFA13|0.7;CSPG4|0.69;CDK1|0.69;DNAJA3|0.69;HYOU1|0.69;PHB2|0.67;MYDGF|0.65;ASPH|0.63;CD44|0.47	13	1946	107	38520	http://www.ebi.ac.uk/QuickGO/GTerm?id=GO:1902531
7	5,6,7	regulation of intracellular steroid hormone receptor signaling pathway	GO:0033143	1.30×10-2	5.02×10-2	-0.3	0.21	1.05743	-10.6873	SMARCA4|0.74;PHB2|0.67	2	62	107	38520	http://www.ebi.ac.uk/QuickGO/GTerm?id=GO:0033143
7	5,6,7	regulation of intrinsic apoptotic signaling pathway in response to osmotic stress	GO:1902218	1.11×10-2	4.47×10-2	0	0.4	1.05743	-10.6873	YBX3|0.72	1	4	107	38520	http://www.ebi.ac.uk/QuickGO/GTerm?id=GO:1902218
7	4,5,6,7	regulation of ion homeostasis	GO:2000021	1.67×10-3	1.51×10-2	-0.79	-0.09	1.05743	-10.6873	SRI|1.57;CYBA|0.7;ASPH|0.63;ERO1L|0.58	4	181	107	38520	http://www.ebi.ac.uk/QuickGO/GTerm?id=GO:2000021
7	6,7	regulation of ion transmembrane transporter activity	GO:0032412	3.77×10-3	2.42×10-2	-0.71	-0.04	1.05743	-10.6873	SRI|1.57;CTSS|0.7;ATP1B1|0.69;ASPH|0.63	4	227	107	38520	http://www.ebi.ac.uk/QuickGO/GTerm?id=GO:0032412
7	6,7	regulation of MHC class II biosynthetic process	GO:0045346	3.82×10-2	9.50×10-2	0	0.4	1.05743	-10.6873	HDAC2|0.73	1	14	107	38520	http://www.ebi.ac.uk/QuickGO/GTerm?id=GO:0045346
7	6,7	regulation of microtubule polymerization or depolymerization	GO:0031110	1.59×10-2	5.75×10-2	0.44	0.68	1.05743	-10.6873	STMN1|1.67;CLIP1|1.66	2	69	107	38520	http://www.ebi.ac.uk/QuickGO/GTerm?id=GO:0031110
7	6,7	regulation of mitotic cell cycle phase transition	GO:1901990	1.78×10-3	1.53×10-2	-0.48	0.1	1.05743	-10.6873	PSMA1|1.74;GIGYF2|1.72;SMARCA4|0.74;CDK1|0.69;PHB2|0.67	5	310	107	38520	http://www.ebi.ac.uk/QuickGO/GTerm?id=GO:1901990
7	6,7	regulation of muscle contraction	GO:0006937	1.48×10-2	5.45×10-2	-0.2	0.28	1.05743	-10.6873	SRI|1.57;ATP1B1|0.69;ASPH|0.63	3	184	107	38520	http://www.ebi.ac.uk/QuickGO/GTerm?id=GO:0006937
7	6,7	regulation of phosphate metabolic process	GO:0019220	4.04×10-3	2.54×10-2	-2.47	-1.14	1.05743	-10.6873	CDKN2A|1.86;SLK|1.69;DBNL|1.6;PPP1R12A|1.54;LPCAT1|0.74;ITGA5|0.73;HDAC2|0.73;CSPG4|0.69;CDK1|0.69;DNAJA3|0.69;PHB2|0.67;MYDGF|0.65;CD44|0.47	13	2023	107	38520	http://www.ebi.ac.uk/QuickGO/GTerm?id=GO:0019220
7	6,7	regulation of phosphatidylcholine biosynthetic process	GO:2001245	5.55×10-3	2.96×10-2	0	0.4	1.05743	-10.6873	LPCAT1|0.74	1	2	107	38520	http://www.ebi.ac.uk/QuickGO/GTerm?id=GO:2001245
7	7	regulation of phosphorylation	GO:0042325	8.58×10-3	3.83×10-2	-2.15	-0.94	1.05743	-10.6873	CDKN2A|1.86;SLK|1.69;DBNL|1.6;ITGA5|0.73;HDAC2|0.73;CSPG4|0.69;CDK1|0.69;DNAJA3|0.69;PHB2|0.67;MYDGF|0.65;CD44|0.47	11	1726	107	38520	http://www.ebi.ac.uk/QuickGO/GTerm?id=GO:0042325
7	6,7	regulation of protein modification process	GO:0031399	5.51×10-3	2.96×10-2	-2.58	-1.21	1.05743	-10.6873	CDKN2A|1.86;PSMA1|1.74;SLK|1.69;DBNL|1.6;PPP1R12A|1.54;ITGA5|0.73;HDAC2|0.73;CSPG4|0.69;CDK1|0.69;DNAJA3|0.69;PHB2|0.67;MYDGF|0.65;CD44|0.47	13	2100	107	38520	http://www.ebi.ac.uk/QuickGO/GTerm?id=GO:0031399
7	7	regulation of protein processing	GO:0070613	3.53×10-2	9.17×10-2	-0.33	0.2	1.05743	-10.6873	C1QBP|0.7;PHB2|0.67	2	106	107	38520	http://www.ebi.ac.uk/QuickGO/GTerm?id=GO:0070613
7	6,7	regulation of relaxation of muscle	GO:1901077	2.47×10-2	7.44×10-2	0	0.4	1.05743	-10.6873	SRI|1.57	1	9	107	38520	http://www.ebi.ac.uk/QuickGO/GTerm?id=GO:1901077
7	7	regulation of superoxide anion generation	GO:0032928	3.28×10-2	8.77×10-2	0	0.4	1.05743	-10.6873	CYBA|0.7	1	12	107	38520	http://www.ebi.ac.uk/QuickGO/GTerm?id=GO:0032928
7	4,6,7	regulation of trophoblast cell migration	GO:1901163	1.93×10-2	6.37×10-2	0	0.4	1.05743	-10.6873	C1QBP|0.7	1	7	107	38520	http://www.ebi.ac.uk/QuickGO/GTerm?id=GO:1901163
7	6,7	regulation of tumor necrosis factor production	GO:0032680	2.89×10-2	8.24×10-2	-0.29	0.22	1.05743	-10.6873	HDAC2|0.73;CYBA|0.7	2	95	107	38520	http://www.ebi.ac.uk/QuickGO/GTerm?id=GO:0032680
7	5,6,7	regulation of viral life cycle	GO:1903900	1.84×10-3	1.56×10-2	-0.91	-0.17	1.05743	-10.6873	GTF2F1|1.8;SMARCA4|0.74;TOP2A|0.6;SSRP1|0.5	4	186	107	38520	http://www.ebi.ac.uk/QuickGO/GTerm?id=GO:1903900
7	7	relaxation of cardiac muscle	GO:0055119	4.35×10-2	1.01×10-1	0	0.4	1.05743	-10.6873	ATP1B1|0.69	1	16	107	38520	http://www.ebi.ac.uk/QuickGO/GTerm?id=GO:0055119
7	7	ribonucleoside monophosphate metabolic process	GO:0009161	3.36×10-2	8.93×10-2	-0.56	0.05	1.05743	-10.6873	PDHA1|0.74;DLD|0.73;ATP5L|0.72;NDUFA10|0.71	4	436	107	38520	http://www.ebi.ac.uk/QuickGO/GTerm?id=GO:0009161
7	7	ribonucleoside triphosphate metabolic process	GO:0009199	2.75×10-2	7.93×10-2	-0.56	0.05	1.05743	-10.6873	PDHA1|0.74;DLD|0.73;ATP5L|0.72;NDUFA10|0.71	4	409	107	38520	http://www.ebi.ac.uk/QuickGO/GTerm?id=GO:0009199
7	6,7	RNA processing	GO:0006396	3.29×10-2	8.77×10-2	-1.44	-0.5	1.05743	-10.6873	GTF2F1|1.8;SRRM1|1.69;DHX30|0.72;C1QBP|0.7;PNPT1|0.69;HNRNPR|0.69;USP39|0.69;FUS|0.67	8	1336	107	38520	http://www.ebi.ac.uk/QuickGO/GTerm?id=GO:0006396
7	6,7	rRNA import into mitochondrion	GO:0035928	8.31×10-3	3.76×10-2	0	0.4	1.05743	-10.6873	PNPT1|0.69	1	3	107	38520	http://www.ebi.ac.uk/QuickGO/GTerm?id=GO:0035928
7	6,7	sarcoplasmic reticulum calcium ion transport	GO:0070296	4.53×10-3	2.73×10-2	0	0.41	1.05743	-10.6873	SRI|1.57;ASPH|0.63	2	36	107	38520	http://www.ebi.ac.uk/QuickGO/GTerm?id=GO:0070296
7	6,7	Schwann cell differentiation	GO:0014037	7.62×10-3	3.70×10-2	-0.11	0.33	1.05743	-10.6873	NDRG1|1.88;CDK1|0.69	2	47	107	38520	http://www.ebi.ac.uk/QuickGO/GTerm?id=GO:0014037
7	7	short-chain fatty acid catabolic process	GO:0019626	2.20×10-2	6.88×10-2	0	0.4	1.05743	-10.6873	MUT|0.74	1	8	107	38520	http://www.ebi.ac.uk/QuickGO/GTerm?id=GO:0019626
7	6,7	signal transduction by p53 class mediator	GO:0072331	1.70×10-3	1.51×10-2	1.05	1.06	1.05743	-10.6873	NDRG1|1.88;PSMA1|1.74;TMEM109|1.61;CD44|0.47	4	182	107	38520	http://www.ebi.ac.uk/QuickGO/GTerm?id=GO:0072331
7	5,6,7	single stranded viral RNA replication via double stranded DNA intermediate	GO:0039692	2.74×10-2	7.92×10-2	0	0.4	1.05743	-10.6873	TOP2A|0.6	1	10	107	38520	http://www.ebi.ac.uk/QuickGO/GTerm?id=GO:0039692
7	6,7	single-organism nuclear import	GO:1902593	4.46×10-2	1.03×10-1	-0.2	0.28	1.05743	-10.6873	SRI|1.57;PHB2|0.67;PARP1|0.66	3	283	107	38520	http://www.ebi.ac.uk/QuickGO/GTerm?id=GO:1902593
7	6,7	small GTPase mediated signal transduction	GO:0007264	4.14×10-2	9.96×10-2	-0.26	0.24	1.05743	-10.6873	CDKN2A|1.86;CLIP1|1.66;DBNL|1.6;PPP1R12A|1.54;KIF2A|0.71;CYBA|0.7;CDK1|0.69;DNAJA3|0.69	8	1400	107	38520	http://www.ebi.ac.uk/QuickGO/GTerm?id=GO:0007264
7	4,7	smooth muscle adaptation	GO:0014805	1.11×10-2	4.47×10-2	0	0.4	1.05743	-10.6873	CYBA|0.7	1	4	107	38520	http://www.ebi.ac.uk/QuickGO/GTerm?id=GO:0014805
7	5,7	smooth muscle hypertrophy	GO:0014895	2.78×10-3	1.95×10-2	0	0.4	1.05743	-10.6873	CYBA|0.7	1	1	107	38520	http://www.ebi.ac.uk/QuickGO/GTerm?id=GO:0014895
7	6,7	SREBP signaling pathway	GO:0032933	4.62×10-2	1.05×10-1	0	0.4	1.05743	-10.6873	ERLIN1|0.69	1	17	107	38520	http://www.ebi.ac.uk/QuickGO/GTerm?id=GO:0032933
7	7	striated muscle contraction	GO:0006941	8.71×10-3	3.87×10-2	-0.2	0.28	1.05743	-10.6873	SRI|1.57;ATP1B1|0.69;ASPH|0.63	3	151	107	38520	http://www.ebi.ac.uk/QuickGO/GTerm?id=GO:0006941
7	7	transcription from RNA polymerase II promoter	GO:0006366	5.11×10-3	2.96×10-2	-2.91	-1.41	1.05743	-10.6873	GTF2F1|1.8;SRRM1|1.69;PPP1R12A|1.54;SMARCA4|0.74;HDAC2|0.73;YBX3|0.72;GLS|0.72;C1QBP|0.7;SMARCA5|0.7;ERLIN1|0.69;CDK1|0.69;DNAJA3|0.69;PARP1|0.66;MYDGF|0.65;TOP2A|0.6;SSRP1|0.5	16	2835	107	38520	http://www.ebi.ac.uk/QuickGO/GTerm?id=GO:0006366
7	6,7	translational elongation	GO:0006414	7.37×10-4	8.94×10-3	-0.78	-0.09	1.05743	-10.6873	MRPL21|0.74;MRPL54|0.72;TUFM|0.71;AURKAIP1|0.68;LARS2|0.64	5	254	107	38520	http://www.ebi.ac.uk/QuickGO/GTerm?id=GO:0006414
7	7	tricarboxylic acid metabolic process	GO:0072350	9.31×10-7	5.70×10-5	-0.78	-0.08	1.05743	-10.6873	PDHA1|0.74;DLD|0.73;MDH2|0.68;CS|0.68;PDHB|0.67	5	63	107	38520	http://www.ebi.ac.uk/QuickGO/GTerm?id=GO:0072350
7	7	triglyceride biosynthetic process	GO:0019432	1.04×10-3	1.10×10-2	-0.39	0.16	1.05743	-10.6873	LPCAT1|0.74;SLC25A1|0.74;TECR|0.74	3	71	107	38520	http://www.ebi.ac.uk/QuickGO/GTerm?id=GO:0019432
7	7	triglyceride metabolic process	GO:0006641	7.79×10-3	3.75×10-2	-0.39	0.16	1.05743	-10.6873	LPCAT1|0.74;SLC25A1|0.74;TECR|0.74	3	145	107	38520	http://www.ebi.ac.uk/QuickGO/GTerm?id=GO:0006641
7	7	very long-chain fatty acid biosynthetic process	GO:0042761	3.01×10-2	8.34×10-2	0	0.4	1.05743	-10.6873	TECR|0.74	1	11	107	38520	http://www.ebi.ac.uk/QuickGO/GTerm?id=GO:0042761
7	5,7	viral transcription	GO:0019083	2.27×10-3	1.78×10-2	-0.85	-0.13	1.05743	-10.6873	GTF2F1|1.8;SMARCA4|0.74;NUP210|0.69;SSRP1|0.5	4	197	107	38520	http://www.ebi.ac.uk/QuickGO/GTerm?id=GO:0019083
7	7	zymogen activation	GO:0031638	1.14×10-2	4.54×10-2	-0.49	0.09	1.05743	-10.6873	AIFM1|0.74;DNAJA3|0.69;ASPH|0.63	3	167	107	38520	http://www.ebi.ac.uk/QuickGO/GTerm?id=GO:0031638
8	8	2-oxoglutarate metabolic process	GO:0006103	4.88×10-2	1.08×10-1	0	0.4	1.05743	-10.6873	DLD|0.73	1	18	107	38520	http://www.ebi.ac.uk/QuickGO/GTerm?id=GO:0006103
8	7,8	acetyl-CoA biosynthetic process	GO:0006085	1.65×10-5	5.17×10-4	-0.44	0.13	1.05743	-10.6873	PDHA1|0.74;DLD|0.73;PDHB|0.67	3	18	107	38520	http://www.ebi.ac.uk/QuickGO/GTerm?id=GO:0006085
8	8	activation of cysteine-type endopeptidase activity	GO:0097202	6.54×10-3	3.35×10-2	-0.49	0.09	1.05743	-10.6873	AIFM1|0.74;DNAJA3|0.69;ASPH|0.63	3	136	107	38520	http://www.ebi.ac.uk/QuickGO/GTerm?id=GO:0097202
8	6,8	alpha-amino acid catabolic process	GO:1901606	4.73×10-3	2.81×10-2	-0.47	0.11	1.05743	-10.6873	DLD|0.73;GLS|0.72;MCCC2|0.64	3	121	107	38520	http://www.ebi.ac.uk/QuickGO/GTerm?id=GO:1901606
8	8	ATP-dependent chromatin remodeling	GO:0043044	1.80×10-3	1.53×10-2	-0.42	0.14	1.05743	-10.6873	SMARCA4|0.74;HDAC2|0.73;SMARCA5|0.7	3	86	107	38520	http://www.ebi.ac.uk/QuickGO/GTerm?id=GO:0043044
8	6,7,8	axon development	GO:0061564	4.14×10-2	9.96×10-2	-0.4	0.15	1.05743	-10.6873	STMN1|1.67;S100A6|1.52;ALCAM|0.73;ITGA5|0.73;CDK1|0.69	5	680	107	38520	http://www.ebi.ac.uk/QuickGO/GTerm?id=GO:0061564
8	7,8	axonogenesis	GO:0007409	3.58×10-2	9.18×10-2	-0.4	0.15	1.05743	-10.6873	STMN1|1.67;S100A6|1.52;ALCAM|0.73;ITGA5|0.73;CDK1|0.69	5	653	107	38520	http://www.ebi.ac.uk/QuickGO/GTerm?id=GO:0007409
8	6,8	branched-chain amino acid catabolic process	GO:0009083	1.27×10-3	1.26×10-2	-0.33	0.2	1.05743	-10.6873	DLD|0.73;MCCC2|0.64	2	19	107	38520	http://www.ebi.ac.uk/QuickGO/GTerm?id=GO:0009083
8	5,7,8	branching involved in prostate gland morphogenesis	GO:0060442	4.09×10-2	9.87×10-2	0	0.4	1.05743	-10.6873	CD44|0.47	1	15	107	38520	http://www.ebi.ac.uk/QuickGO/GTerm?id=GO:0060442
8	8	cardiac muscle contraction	GO:0060048	3.63×10-3	2.34×10-2	-0.2	0.28	1.05743	-10.6873	SRI|1.57;ATP1B1|0.69;ASPH|0.63	3	110	107	38520	http://www.ebi.ac.uk/QuickGO/GTerm?id=GO:0060048
8	8	cardiolipin biosynthetic process	GO:0032049	1.93×10-2	6.37×10-2	0	0.4	1.05743	-10.6873	PTPMT1|0.71	1	7	107	38520	http://www.ebi.ac.uk/QuickGO/GTerm?id=GO:0032049
8	7,8	cellular cation homeostasis	GO:0030003	7.63×10-3	3.70×10-2	-1.08	-0.27	1.05743	-10.6873	SRI|1.57;ATP6V0D1|0.74;CYBA|0.7;ATP1B1|0.69;ASPH|0.63;ERO1L|0.58	6	617	107	38520	http://www.ebi.ac.uk/QuickGO/GTerm?id=GO:0030003
8	5,8	cellular component disassembly involved in execution phase of apoptosis	GO:0006921	1.41×10-3	1.35×10-2	-0.2	0.27	1.05743	-10.6873	DBNL|1.6;AIFM1|0.74;TOP2A|0.6	3	79	107	38520	http://www.ebi.ac.uk/QuickGO/GTerm?id=GO:0006921
8	6,7,8	cellular glucose homeostasis	GO:0001678	4.96×10-2	1.09×10-1	-0.04	0.38	1.05743	-10.6873	SRI|1.57;CYBA|0.7	2	128	107	38520	http://www.ebi.ac.uk/QuickGO/GTerm?id=GO:0001678
8	8	cellular response to hexose stimulus	GO:0071331	3.53×10-2	9.17×10-2	-0.04	0.38	1.05743	-10.6873	SRI|1.57;CYBA|0.7	2	106	107	38520	http://www.ebi.ac.uk/QuickGO/GTerm?id=GO:0071331
8	5,7,8	chromatin silencing	GO:0006342	1.81×10-2	6.17×10-2	-0.29	0.22	1.05743	-10.6873	HDAC2|0.73;SMARCA5|0.7	2	74	107	38520	http://www.ebi.ac.uk/QuickGO/GTerm?id=GO:0006342
8	8	citrate metabolic process	GO:0006101	4.69×10-7	3.35×10-5	-0.78	-0.08	1.05743	-10.6873	PDHA1|0.74;DLD|0.73;MDH2|0.68;CS|0.68;PDHB|0.67	5	55	107	38520	http://www.ebi.ac.uk/QuickGO/GTerm?id=GO:0006101
8	7,8	cotranslational protein targeting to membrane	GO:0006613	4.82×10-2	1.08×10-1	-0.3	0.22	1.05743	-10.6873	DDOST|0.74;SEC62|0.68	2	126	107	38520	http://www.ebi.ac.uk/QuickGO/GTerm?id=GO:0006613
8	5,8	dermatan sulfate metabolic process	GO:0030205	3.55×10-2	9.17×10-2	0	0.4	1.05743	-10.6873	CSPG4|0.69	1	13	107	38520	http://www.ebi.ac.uk/QuickGO/GTerm?id=GO:0030205
8	8	dermatan sulfate proteoglycan biosynthetic process	GO:0050651	4.09×10-2	9.87×10-2	0	0.4	1.05743	-10.6873	CSPG4|0.69	1	15	107	38520	http://www.ebi.ac.uk/QuickGO/GTerm?id=GO:0050651
8	8	divalent inorganic cation homeostasis	GO:0072507	6.08×10-3	3.19×10-2	-0.95	-0.19	1.05743	-10.6873	SRI|1.57;CYBA|0.7;ATP1B1|0.69;ASPH|0.63;ERO1L|0.58	5	414	107	38520	http://www.ebi.ac.uk/QuickGO/GTerm?id=GO:0072507
8	7,8	divalent inorganic cation transport	GO:0072511	3.83×10-2	9.50×10-2	-0.95	-0.19	1.05743	-10.6873	SRI|1.57;CYBA|0.7;ATP1B1|0.69;ASPH|0.63;ERO1L|0.58	5	665	107	38520	http://www.ebi.ac.uk/QuickGO/GTerm?id=GO:0072511
8	7,8	DNA damage response, signal transduction by p53 class mediator	GO:0030330	4.84×10-3	2.85×10-2	0.33	0.61	1.05743	-10.6873	NDRG1|1.88;PSMA1|1.74;CD44|0.47	3	122	107	38520	http://www.ebi.ac.uk/QuickGO/GTerm?id=GO:0030330
8	8	fatty acid beta-oxidation using acyl-CoA oxidase	GO:0033540	3.01×10-2	8.34×10-2	0	0.4	1.05743	-10.6873	HSD17B4|0.54	1	11	107	38520	http://www.ebi.ac.uk/QuickGO/GTerm?id=GO:0033540
8	7,8	fatty-acyl-CoA biosynthetic process	GO:0046949	1.86×10-3	1.56×10-2	-0.26	0.24	1.05743	-10.6873	SLC25A1|0.74;TECR|0.74	2	23	107	38520	http://www.ebi.ac.uk/QuickGO/GTerm?id=GO:0046949
8	8	gluconeogenesis	GO:0006094	3.65×10-2	9.31×10-2	-0.3	0.22	1.05743	-10.6873	SLC25A1|0.74;MDH2|0.68	2	108	107	38520	http://www.ebi.ac.uk/QuickGO/GTerm?id=GO:0006094
8	8	glutamine catabolic process	GO:0006543	5.55×10-3	2.96×10-2	0	0.4	1.05743	-10.6873	GLS|0.72	1	2	107	38520	http://www.ebi.ac.uk/QuickGO/GTerm?id=GO:0006543
8	8	inflammatory cell apoptotic process	GO:0006925	4.35×10-2	1.01×10-1	0	0.4	1.05743	-10.6873	CDKN2A|1.86	1	16	107	38520	http://www.ebi.ac.uk/QuickGO/GTerm?id=GO:0006925
8	5,7,8	innate immune response-activating signal transduction	GO:0002758	1.56×10-3	1.44×10-2	-0.87	-0.14	1.05743	-10.6873	PSMA1|1.74;C1QBP|0.7;CYBA|0.7;CTSS|0.7;CDK1|0.69	5	301	107	38520	http://www.ebi.ac.uk/QuickGO/GTerm?id=GO:0002758
8	5,6,8	inositol phosphate catabolic process	GO:0071545	4.35×10-2	1.01×10-1	0	0.4	1.05743	-10.6873	PTPMT1|0.71	1	16	107	38520	http://www.ebi.ac.uk/QuickGO/GTerm?id=GO:0071545
8	7,8	intrinsic apoptotic signaling pathway by p53 class mediator	GO:0072332	1.81×10-2	6.17×10-2	0.12	0.48	1.05743	-10.6873	TMEM109|1.61;CD44|0.47	2	74	107	38520	http://www.ebi.ac.uk/QuickGO/GTerm?id=GO:0072332
8	6,7,8	intrinsic apoptotic signaling pathway in response to endoplasmic reticulum stress	GO:0070059	1.98×10-5	6.00×10-4	-0.71	-0.04	1.05743	-10.6873	UBE2K|1.53;AIFM1|0.74;HYOU1|0.69;ERO1L|0.58	4	57	107	38520	http://www.ebi.ac.uk/QuickGO/GTerm?id=GO:0070059
8	6,7,8	intrinsic apoptotic signaling pathway in response to hypoxia	GO:1990144	1.38×10-2	5.13×10-2	0	0.4	1.05743	-10.6873	HYOU1|0.69	1	5	107	38520	http://www.ebi.ac.uk/QuickGO/GTerm?id=GO:1990144
8	7,8	leucine transport	GO:0015820	1.66×10-2	5.78×10-2	0	0.4	1.05743	-10.6873	SLC7A5|0.63	1	6	107	38520	http://www.ebi.ac.uk/QuickGO/GTerm?id=GO:0015820
8	8	leukocyte apoptotic process	GO:0071887	3.41×10-2	8.99×10-2	-0.11	0.33	1.05743	-10.6873	CDKN2A|1.86;DNAJA3|0.69	2	104	107	38520	http://www.ebi.ac.uk/QuickGO/GTerm?id=GO:0071887
8	7,8	long-chain fatty-acyl-CoA metabolic process	GO:0035336	2.56×10-3	1.94×10-2	-0.26	0.24	1.05743	-10.6873	SLC25A1|0.74;TECR|0.74	2	27	107	38520	http://www.ebi.ac.uk/QuickGO/GTerm?id=GO:0035336
8	8	lysine catabolic process	GO:0006554	2.47×10-2	7.44×10-2	0	0.4	1.05743	-10.6873	DLD|0.73	1	9	107	38520	http://www.ebi.ac.uk/QuickGO/GTerm?id=GO:0006554
8	7,8	medium-chain fatty-acyl-CoA metabolic process	GO:0036112	8.31×10-3	3.76×10-2	0	0.4	1.05743	-10.6873	HSD17B4|0.54	1	3	107	38520	http://www.ebi.ac.uk/QuickGO/GTerm?id=GO:0036112
8	8	metal ion homeostasis	GO:0055065	1.56×10-3	1.44×10-2	-1.21	-0.35	1.05743	-10.6873	SRI|1.57;SFXN3|0.74;ATP6V0D1|0.74;CYBA|0.7;ATP1B1|0.69;ASPH|0.63;ERO1L|0.58	7	607	107	38520	http://www.ebi.ac.uk/QuickGO/GTerm?id=GO:0055065
8	7,8	miRNA metabolic process	GO:0010586	4.35×10-2	1.01×10-1	0	0.4	1.05743	-10.6873	PNPT1|0.69	1	16	107	38520	http://www.ebi.ac.uk/QuickGO/GTerm?id=GO:0010586
8	7,8	mitochondrial ATP synthesis coupled electron transport	GO:0042775	2.35×10-2	7.27×10-2	-0.29	0.22	1.05743	-10.6873	DLD|0.73;NDUFA10|0.71	2	85	107	38520	http://www.ebi.ac.uk/QuickGO/GTerm?id=GO:0042775
8	5,7,8	mitochondrial DNA repair	GO:0043504	1.66×10-2	5.78×10-2	0	0.4	1.05743	-10.6873	PARP1|0.66	1	6	107	38520	http://www.ebi.ac.uk/QuickGO/GTerm?id=GO:0043504
8	6,7,8	mitochondrial respiratory chain complex assembly	GO:0033108	5.30×10-3	2.96×10-2	-0.32	0.2	1.05743	-10.6873	AIFM1|0.74;ACAD9|0.64	2	39	107	38520	http://www.ebi.ac.uk/QuickGO/GTerm?id=GO:0033108
8	7,8	mitochondrial RNA catabolic process	GO:0000957	1.11×10-2	4.47×10-2	0	0.4	1.05743	-10.6873	PNPT1|0.69	1	4	107	38520	http://www.ebi.ac.uk/QuickGO/GTerm?id=GO:0000957
8	6,7,8	mitochondrial translational elongation	GO:0070125	1.20×10-4	2.39×10-3	-0.59	0.03	1.05743	-10.6873	MRPL21|0.74;MRPL54|0.72;TUFM|0.71;AURKAIP1|0.68	4	90	107	38520	http://www.ebi.ac.uk/QuickGO/GTerm?id=GO:0070125
8	5,8	mitochondrial translational initiation	GO:0070124	1.69×10-3	1.51×10-2	-0.44	0.13	1.05743	-10.6873	MRPL21|0.74;MRPL54|0.72;AURKAIP1|0.68	3	84	107	38520	http://www.ebi.ac.uk/QuickGO/GTerm?id=GO:0070124
8	5,6,7,8	mitochondrial transmembrane transport	GO:1990542	1.38×10-2	5.13×10-2	-0.3	0.22	1.05743	-10.6873	ATP5L|0.72;NDUFA13|0.7	2	64	107	38520	http://www.ebi.ac.uk/QuickGO/GTerm?id=GO:1990542
8	6,7,8	mitotic G2 DNA damage checkpoint	GO:0007095	3.82×10-2	9.50×10-2	0	0.4	1.05743	-10.6873	CDK1|0.69	1	14	107	38520	http://www.ebi.ac.uk/QuickGO/GTerm?id=GO:0007095
8	7,8	monocyte aggregation	GO:0070487	1.38×10-2	5.13×10-2	0	0.4	1.05743	-10.6873	CD44|0.47	1	5	107	38520	http://www.ebi.ac.uk/QuickGO/GTerm?id=GO:0070487
8	7,8	mRNA processing	GO:0006397	1.76×10-3	1.52×10-2	-1.3	-0.41	1.05743	-10.6873	GTF2F1|1.8;SRRM1|1.69;C1QBP|0.7;PNPT1|0.69;HNRNPR|0.69;USP39|0.69;FUS|0.67	7	620	107	38520	http://www.ebi.ac.uk/QuickGO/GTerm?id=GO:0006397
8	5,7,8	mucus secretion	GO:0070254	3.82×10-2	9.50×10-2	0	0.4	1.05743	-10.6873	CYBA|0.7	1	14	107	38520	http://www.ebi.ac.uk/QuickGO/GTerm?id=GO:0070254
8	7,8	NADH dehydrogenase complex assembly	GO:0010257	1.14×10-3	1.16×10-2	-0.32	0.2	1.05743	-10.6873	AIFM1|0.74;ACAD9|0.64	2	18	107	38520	http://www.ebi.ac.uk/QuickGO/GTerm?id=GO:0010257
8	7,8	negative regulation of anoikis	GO:2000811	4.35×10-2	1.01×10-1	0	0.4	1.05743	-10.6873	ITGA5|0.73	1	16	107	38520	http://www.ebi.ac.uk/QuickGO/GTerm?id=GO:2000811
8	5,6,7,8	negative regulation of apoptotic signaling pathway	GO:2001234	3.27×10-3	2.19×10-2	-0.79	-0.09	1.05743	-10.6873	YBX3|0.72;NDUFA13|0.7;HYOU1|0.69;CD44|0.47	4	218	107	38520	http://www.ebi.ac.uk/QuickGO/GTerm?id=GO:2001234
8	7,8	negative regulation of cell cycle G1/S phase transition	GO:1902807	4.52×10-3	2.73×10-2	0.13	0.48	1.05743	-10.6873	PSMA1|1.74;GIGYF2|1.72;SMARCA4|0.74	3	119	107	38520	http://www.ebi.ac.uk/QuickGO/GTerm?id=GO:1902807
8	6,8	negative regulation of cholesterol metabolic process	GO:0090206	1.38×10-2	5.13×10-2	0	0.4	1.05743	-10.6873	ERLIN1|0.69	1	5	107	38520	http://www.ebi.ac.uk/QuickGO/GTerm?id=GO:0090206
8	5,6,7,8	negative regulation of intracellular steroid hormone receptor signaling pathway	GO:0033144	3.59×10-3	2.34×10-2	-0.3	0.21	1.05743	-10.6873	SMARCA4|0.74;PHB2|0.67	2	32	107	38520	http://www.ebi.ac.uk/QuickGO/GTerm?id=GO:0033144
8	6,7,8	negative regulation of intrinsic apoptotic signaling pathway	GO:2001243	1.66×10-4	2.95×10-3	-0.79	-0.09	1.05743	-10.6873	YBX3|0.72;NDUFA13|0.7;HYOU1|0.69;CD44|0.47	4	98	107	38520	http://www.ebi.ac.uk/QuickGO/GTerm?id=GO:2001243
8	6,8	negative regulation of intrinsic apoptotic signaling pathway in response to DNA damage by p53 class mediator	GO:1902166	3.55×10-2	9.17×10-2	0	0.4	1.05743	-10.6873	CD44|0.47	1	13	107	38520	http://www.ebi.ac.uk/QuickGO/GTerm?id=GO:1902166
8	6,7,8	negative regulation of mitotic cell cycle phase transition	GO:1901991	2.62×10-3	1.95×10-2	-0.18	0.29	1.05743	-10.6873	PSMA1|1.74;GIGYF2|1.72;SMARCA4|0.74;CDK1|0.69	4	205	107	38520	http://www.ebi.ac.uk/QuickGO/GTerm?id=GO:1901991
8	6,7,8	negative regulation of necroptotic process	GO:0060546	4.88×10-2	1.08×10-1	0	0.4	1.05743	-10.6873	YBX3|0.72	1	18	107	38520	http://www.ebi.ac.uk/QuickGO/GTerm?id=GO:0060546
8	6,7,8	negative regulation of phosphatidylcholine biosynthetic process	GO:2001246	2.78×10-3	1.95×10-2	0	0.4	1.05743	-10.6873	LPCAT1|0.74	1	1	107	38520	http://www.ebi.ac.uk/QuickGO/GTerm?id=GO:2001246
8	6,7,8	negative regulation of transcription, DNA-templated	GO:0045892	4.16×10-3	2.58×10-2	-1.66	-0.63	1.05743	-10.6873	CDKN2A|1.86;SMARCA4|0.74;HDAC2|0.73;YBX3|0.72;C1QBP|0.7;SMARCA5|0.7;NDUFA13|0.7;DNAJA3|0.69;PHB2|0.67;PARP1|0.66	10	1339	107	38520	http://www.ebi.ac.uk/QuickGO/GTerm?id=GO:0045892
8	5,6,7,8	negative regulation of viral-induced cytoplasmic pattern recognition receptor signaling pathway	GO:0039532	1.38×10-2	5.13×10-2	0	0.4	1.05743	-10.6873	C1QBP|0.7	1	5	107	38520	http://www.ebi.ac.uk/QuickGO/GTerm?id=GO:0039532
8	6,8	neuron differentiation	GO:0030182	3.53×10-2	9.17×10-2	-0.84	-0.13	1.05743	-10.6873	GIGYF2|1.72;STMN1|1.67;DBNL|1.6;S100A6|1.52;AIFM1|0.74;ALCAM|0.73;ITGA5|0.73;HDAC2|0.73;CDK1|0.69	9	1609	107	38520	http://www.ebi.ac.uk/QuickGO/GTerm?id=GO:0030182
8	8	nuclear import	GO:0051170	4.61×10-2	1.05×10-1	-0.2	0.28	1.05743	-10.6873	SRI|1.57;PHB2|0.67;PARP1|0.66	3	287	107	38520	http://www.ebi.ac.uk/QuickGO/GTerm?id=GO:0051170
8	6,7,8	organic anion transport	GO:0015711	4.46×10-2	1.03×10-1	-0.9	-0.16	1.05743	-10.6873	SLC25A1|0.74;GLS|0.72;SLC7A5|0.63;SERINC1|0.62;SLCO3A1|0.61	5	694	107	38520	http://www.ebi.ac.uk/QuickGO/GTerm?id=GO:0015711
8	8	oxaloacetate metabolic process	GO:0006107	2.47×10-2	7.44×10-2	0	0.4	1.05743	-10.6873	MDH2|0.68	1	9	107	38520	http://www.ebi.ac.uk/QuickGO/GTerm?id=GO:0006107
8	8	peptidyl-asparagine modification	GO:0018196	4.47×10-4	6.07×10-3	-0.61	0.02	1.05743	-10.6873	DDOST|0.74;STT3A|0.73;MLEC|0.71;GANAB|0.64	4	127	107	38520	http://www.ebi.ac.uk/QuickGO/GTerm?id=GO:0018196
8	8	peptidyl-aspartic acid modification	GO:0018197	5.55×10-3	2.96×10-2	0	0.4	1.05743	-10.6873	ASPH|0.63	1	2	107	38520	http://www.ebi.ac.uk/QuickGO/GTerm?id=GO:0018197
8	8	peptidyl-lysine modification	GO:0018205	3.56×10-2	9.17×10-2	-0.62	0.01	1.05743	-10.6873	HDAC2|0.73;TRRAP|0.72;NUP210|0.69;PARP1|0.66	4	444	107	38520	http://www.ebi.ac.uk/QuickGO/GTerm?id=GO:0018205
8	7,8	peripheral nervous system myelin maintenance	GO:0032287	4.88×10-2	1.08×10-1	0	0.4	1.05743	-10.6873	NDRG1|1.88	1	18	107	38520	http://www.ebi.ac.uk/QuickGO/GTerm?id=GO:0032287
8	7,8	phenylalanine transport	GO:0015823	5.55×10-3	2.96×10-2	0	0.4	1.05743	-10.6873	SLC7A5|0.63	1	2	107	38520	http://www.ebi.ac.uk/QuickGO/GTerm?id=GO:0015823
8	8	phosphatidylglycerol acyl-chain remodeling	GO:0036148	4.62×10-2	1.05×10-1	0	0.4	1.05743	-10.6873	LPCAT1|0.74	1	17	107	38520	http://www.ebi.ac.uk/QuickGO/GTerm?id=GO:0036148
8	7,8	polyadenylation-dependent RNA catabolic process	GO:0043633	2.20×10-2	6.88×10-2	0	0.4	1.05743	-10.6873	PNPT1|0.69	1	8	107	38520	http://www.ebi.ac.uk/QuickGO/GTerm?id=GO:0043633
8	5,7,8	positive regulation of calcium ion transport	GO:0051928	4.21×10-3	2.58×10-2	-0.2	0.28	1.05743	-10.6873	SRI|1.57;ATP1B1|0.69;ASPH|0.63	3	116	107	38520	http://www.ebi.ac.uk/QuickGO/GTerm?id=GO:0051928
8	4,6,7,8	positive regulation of calcium ion transport into cytosol	GO:0010524	6.70×10-3	3.39×10-2	0	0.41	1.05743	-10.6873	SRI|1.57;ASPH|0.63	2	44	107	38520	http://www.ebi.ac.uk/QuickGO/GTerm?id=GO:0010524
8	7,8	positive regulation of calcium:sodium antiporter activity	GO:1903281	5.55×10-3	2.96×10-2	0	0.4	1.05743	-10.6873	ATP1B1|0.69	1	2	107	38520	http://www.ebi.ac.uk/QuickGO/GTerm?id=GO:1903281
8	7,8	positive regulation of cysteine-type endopeptidase activity involved in apoptotic process	GO:0043280	1.02×10-2	4.34×10-2	-0.45	0.12	1.05743	-10.6873	AIFM1|0.74;NDUFA13|0.7;DNAJA3|0.69	3	160	107	38520	http://www.ebi.ac.uk/QuickGO/GTerm?id=GO:0043280
8	7,8	positive regulation of cytoplasmic translation	GO:2000767	5.55×10-3	2.96×10-2	0	0.4	1.05743	-10.6873	YBX3|0.72	1	2	107	38520	http://www.ebi.ac.uk/QuickGO/GTerm?id=GO:2000767
8	7,8	positive regulation of endopeptidase activity	GO:0010950	1.70×10-3	1.51×10-2	-0.65	0	1.05743	-10.6873	AIFM1|0.74;NDUFA13|0.7;DNAJA3|0.69;ASPH|0.63	4	182	107	38520	http://www.ebi.ac.uk/QuickGO/GTerm?id=GO:0010950
8	7,8	positive regulation of exit from mitosis	GO:0031536	1.66×10-2	5.78×10-2	0	0.4	1.05743	-10.6873	PHB2|0.67	1	6	107	38520	http://www.ebi.ac.uk/QuickGO/GTerm?id=GO:0031536
8	5,6,7,8	positive regulation of intracellular signal transduction	GO:1902533	6.76×10-3	3.42×10-2	-1.51	-0.54	1.05743	-10.6873	DBNL|1.6;HDAC2|0.73;C1QBP|0.7;CSPG4|0.69;CDK1|0.69;PHB2|0.67;MYDGF|0.65;CD44|0.47	8	998	107	38520	http://www.ebi.ac.uk/QuickGO/GTerm?id=GO:1902533
8	7,8	positive regulation of microtubule polymerization or depolymerization	GO:0031112	4.35×10-2	1.01×10-1	0	0.4	1.05743	-10.6873	CLIP1|1.66	1	16	107	38520	http://www.ebi.ac.uk/QuickGO/GTerm?id=GO:0031112
8	7,8	positive regulation of monocyte aggregation	GO:1900625	8.31×10-3	3.76×10-2	0	0.4	1.05743	-10.6873	CD44|0.47	1	3	107	38520	http://www.ebi.ac.uk/QuickGO/GTerm?id=GO:1900625
8	7,8	positive regulation of muscle cell apoptotic process	GO:0010661	3.82×10-2	9.50×10-2	0	0.4	1.05743	-10.6873	CDKN2A|1.86	1	14	107	38520	http://www.ebi.ac.uk/QuickGO/GTerm?id=GO:0010661
8	7,8	positive regulation of myeloid cell apoptotic process	GO:0033034	1.66×10-2	5.78×10-2	0	0.4	1.05743	-10.6873	CDKN2A|1.86	1	6	107	38520	http://www.ebi.ac.uk/QuickGO/GTerm?id=GO:0033034
8	7,8	positive regulation of nucleic acid-templated transcription	GO:1903508	1.82×10-2	6.18×10-2	-1.84	-0.74	1.05743	-10.6873	GTF2F1|1.8;PPP1R12A|1.54;SMARCA4|0.74;HDAC2|0.73;ERLIN1|0.69;PHB2|0.67;PARP1|0.66;MYDGF|0.65;ASPH|0.63;TOP2A|0.6	10	1675	107	38520	http://www.ebi.ac.uk/QuickGO/GTerm?id=GO:1903508
8	7,8	positive regulation of phosphorylation	GO:0042327	4.21×10-3	2.58×10-2	-1.72	-0.67	1.05743	-10.6873	SLK|1.69;DBNL|1.6;ITGA5|0.73;HDAC2|0.73;CSPG4|0.69;CDK1|0.69;PHB2|0.67;MYDGF|0.65;CD44|0.47	9	1126	107	38520	http://www.ebi.ac.uk/QuickGO/GTerm?id=GO:0042327
8	6,7,8	positive regulation of protein kinase B signaling	GO:0051897	2.15×10-2	6.88×10-2	-0.34	0.19	1.05743	-10.6873	C1QBP|0.7;MYDGF|0.65	2	81	107	38520	http://www.ebi.ac.uk/QuickGO/GTerm?id=GO:0051897
8	7,8	positive regulation of protein phosphorylation	GO:0001934	3.32×10-3	2.21×10-2	-1.72	-0.67	1.05743	-10.6873	SLK|1.69;DBNL|1.6;ITGA5|0.73;HDAC2|0.73;CSPG4|0.69;CDK1|0.69;PHB2|0.67;MYDGF|0.65;CD44|0.47	9	1086	107	38520	http://www.ebi.ac.uk/QuickGO/GTerm?id=GO:0001934
8	5,6,7,8	positive regulation of receptor biosynthetic process	GO:0010870	3.28×10-2	8.77×10-2	0	0.4	1.05743	-10.6873	HDAC2|0.73	1	12	107	38520	http://www.ebi.ac.uk/QuickGO/GTerm?id=GO:0010870
8	6,7,8	positive regulation of single stranded viral RNA replication via double stranded DNA intermediate	GO:0045870	2.78×10-3	1.95×10-2	0	0.4	1.05743	-10.6873	TOP2A|0.6	1	1	107	38520	http://www.ebi.ac.uk/QuickGO/GTerm?id=GO:0045870
8	6,7,8	positive regulation of superoxide anion generation	GO:0032930	2.20×10-2	6.88×10-2	0	0.4	1.05743	-10.6873	CYBA|0.7	1	8	107	38520	http://www.ebi.ac.uk/QuickGO/GTerm?id=GO:0032930
8	6,7,8	positive regulation of translation	GO:0045727	2.72×10-2	7.92×10-2	-0.3	0.22	1.05743	-10.6873	YBX3|0.72;C1QBP|0.7	2	92	107	38520	http://www.ebi.ac.uk/QuickGO/GTerm?id=GO:0045727
8	6,7,8	positive regulation of tumor necrosis factor production	GO:0032760	8.92×10-3	3.93×10-2	-0.29	0.22	1.05743	-10.6873	HDAC2|0.73;CYBA|0.7	2	51	107	38520	http://www.ebi.ac.uk/QuickGO/GTerm?id=GO:0032760
8	7,8	positive regulation of ubiquitin-protein ligase activity involved in regulation of mitotic cell cycle transition	GO:0051437	1.72×10-2	5.93×10-2	-0.08	0.35	1.05743	-10.6873	PSMA1|1.74;CDK1|0.69	2	72	107	38520	http://www.ebi.ac.uk/QuickGO/GTerm?id=GO:0051437
8	6,7,8	positive regulation of viral transcription	GO:0050434	4.92×10-4	6.43×10-3	-0.26	0.24	1.05743	-10.6873	GTF2F1|1.8;SMARCA4|0.74;SSRP1|0.5	3	55	107	38520	http://www.ebi.ac.uk/QuickGO/GTerm?id=GO:0050434
8	6,7,8	posttranslational protein targeting to membrane	GO:0006620	2.20×10-2	6.88×10-2	0	0.4	1.05743	-10.6873	SEC62|0.68	1	8	107	38520	http://www.ebi.ac.uk/QuickGO/GTerm?id=GO:0006620
8	8	pri-miRNA transcription from RNA polymerase II promoter	GO:0061614	8.31×10-3	3.76×10-2	0	0.4	1.05743	-10.6873	SMARCA4|0.74	1	3	107	38520	http://www.ebi.ac.uk/QuickGO/GTerm?id=GO:0061614
8	8	protein acetylation	GO:0006473	2.53×10-2	7.58×10-2	-0.45	0.12	1.05743	-10.6873	HDAC2|0.73;TRRAP|0.72;MDH2|0.68	3	226	107	38520	http://www.ebi.ac.uk/QuickGO/GTerm?id=GO:0006473
8	8	protein depolymerization	GO:0051261	1.11×10-2	4.47×10-2	-0.22	0.26	1.05743	-10.6873	STMN1|1.67;KIF2A|0.71;ASPH|0.63	3	165	107	38520	http://www.ebi.ac.uk/QuickGO/GTerm?id=GO:0051261
8	7,8	protein hexamerization	GO:0034214	1.93×10-2	6.37×10-2	0	0.4	1.05743	-10.6873	OAT|0.73	1	7	107	38520	http://www.ebi.ac.uk/QuickGO/GTerm?id=GO:0034214
8	5,7,8	protein import into mitochondrial inner membrane	GO:0045039	1.11×10-2	4.47×10-2	0	0.4	1.05743	-10.6873	NDUFA13|0.7	1	4	107	38520	http://www.ebi.ac.uk/QuickGO/GTerm?id=GO:0045039
8	5,6,7,8	protein import into nucleus	GO:0006606	4.46×10-2	1.03×10-1	-0.2	0.28	1.05743	-10.6873	SRI|1.57;PHB2|0.67;PARP1|0.66	3	283	107	38520	http://www.ebi.ac.uk/QuickGO/GTerm?id=GO:0006606
8	8	protein localization to chromosome, centromeric region	GO:0071459	3.28×10-2	8.77×10-2	0	0.4	1.05743	-10.6873	CDK1|0.69	1	12	107	38520	http://www.ebi.ac.uk/QuickGO/GTerm?id=GO:0071459
8	7,8	protein localization to plasma membrane raft	GO:0044860	7.60×10-5	1.69×10-3	-0.06	0.37	1.05743	-10.6873	CLIP1|1.66;ATP1B1|0.69	2	5	107	38520	http://www.ebi.ac.uk/QuickGO/GTerm?id=GO:0044860
8	5,8	protein N-linked glycosylation	GO:0006487	9.66×10-4	1.07×10-2	-0.61	0.02	1.05743	-10.6873	DDOST|0.74;STT3A|0.73;MLEC|0.71;GANAB|0.64	4	156	107	38520	http://www.ebi.ac.uk/QuickGO/GTerm?id=GO:0006487
8	5,6,7,8	protein targeting to nucleus	GO:0044744	4.46×10-2	1.03×10-1	-0.2	0.28	1.05743	-10.6873	SRI|1.57;PHB2|0.67;PARP1|0.66	3	283	107	38520	http://www.ebi.ac.uk/QuickGO/GTerm?id=GO:0044744
8	7,8	protein tetramerization	GO:0051262	4.03×10-2	9.87×10-2	-0.29	0.22	1.05743	-10.6873	GLS|0.72;HM13|0.71	2	114	107	38520	http://www.ebi.ac.uk/QuickGO/GTerm?id=GO:0051262
8	8	purine ribonucleoside monophosphate metabolic process	GO:0009167	2.82×10-2	8.08×10-2	-0.56	0.05	1.05743	-10.6873	PDHA1|0.74;DLD|0.73;ATP5L|0.72;NDUFA10|0.71	4	412	107	38520	http://www.ebi.ac.uk/QuickGO/GTerm?id=GO:0009167
8	8	purine ribonucleoside triphosphate metabolic process	GO:0009205	2.63×10-2	7.76×10-2	-0.56	0.05	1.05743	-10.6873	PDHA1|0.74;DLD|0.73;ATP5L|0.72;NDUFA10|0.71	4	403	107	38520	http://www.ebi.ac.uk/QuickGO/GTerm?id=GO:0009205
8	8	pyruvate metabolic process	GO:0006090	1.84×10-3	1.56×10-2	-0.58	0.04	1.05743	-10.6873	PDHA1|0.74;BSG|0.73;DLD|0.73;PDHB|0.67	4	186	107	38520	http://www.ebi.ac.uk/QuickGO/GTerm?id=GO:0006090
8	8	regulation of blood volume by renin-angiotensin	GO:0002016	3.01×10-2	8.34×10-2	0	0.4	1.05743	-10.6873	CYBA|0.7	1	11	107	38520	http://www.ebi.ac.uk/QuickGO/GTerm?id=GO:0002016
8	7,8	regulation of calcium ion transmembrane transporter activity	GO:1901019	2.26×10-3	1.78×10-2	-0.2	0.28	1.05743	-10.6873	SRI|1.57;ATP1B1|0.69;ASPH|0.63	3	93	107	38520	http://www.ebi.ac.uk/QuickGO/GTerm?id=GO:1901019
8	6,7,8	regulation of cholesterol biosynthetic process	GO:0045540	3.82×10-2	9.50×10-2	0	0.4	1.05743	-10.6873	ERLIN1|0.69	1	14	107	38520	http://www.ebi.ac.uk/QuickGO/GTerm?id=GO:0045540
8	5,7,8	regulation of complement activation	GO:0030449	5.30×10-3	2.96×10-2	-0.33	0.2	1.05743	-10.6873	C1QBP|0.7;PHB2|0.67	2	39	107	38520	http://www.ebi.ac.uk/QuickGO/GTerm?id=GO:0030449
8	8	regulation of cysteine-type endopeptidase activity	GO:2000116	1.05×10-3	1.11×10-2	-0.98	-0.21	1.05743	-10.6873	AIFM1|0.74;NDUFA13|0.7;DNAJA3|0.69;ASPH|0.63;CD44|0.47	5	275	107	38520	http://www.ebi.ac.uk/QuickGO/GTerm?id=GO:2000116
8	7,8	regulation of cytoplasmic translation	GO:2000765	2.74×10-2	7.92×10-2	0	0.4	1.05743	-10.6873	YBX3|0.72	1	10	107	38520	http://www.ebi.ac.uk/QuickGO/GTerm?id=GO:2000765
8	6,7,8	regulation of DNA catabolic process	GO:1903624	2.20×10-2	6.88×10-2	0	0.4	1.05743	-10.6873	AIFM1|0.74	1	8	107	38520	http://www.ebi.ac.uk/QuickGO/GTerm?id=GO:1903624
8	7,8	regulation of exit from mitosis	GO:0007096	4.09×10-2	9.87×10-2	0	0.4	1.05743	-10.6873	PHB2|0.67	1	15	107	38520	http://www.ebi.ac.uk/QuickGO/GTerm?id=GO:0007096
8	7,8	regulation of G1/S transition of mitotic cell cycle	GO:2000045	9.02×10-3	3.95×10-2	0.13	0.48	1.05743	-10.6873	PSMA1|1.74;GIGYF2|1.72;SMARCA4|0.74	3	153	107	38520	http://www.ebi.ac.uk/QuickGO/GTerm?id=GO:2000045
8	6,8	regulation of heart contraction	GO:0008016	1.28×10-2	4.96×10-2	-0.2	0.28	1.05743	-10.6873	SRI|1.57;ATP1B1|0.69;ASPH|0.63	3	174	107	38520	http://www.ebi.ac.uk/QuickGO/GTerm?id=GO:0008016
8	6,7,8	regulation of intrinsic apoptotic signaling pathway	GO:2001242	1.01×10-3	1.09×10-2	-0.79	-0.09	1.05743	-10.6873	YBX3|0.72;NDUFA13|0.7;HYOU1|0.69;CD44|0.47	4	158	107	38520	http://www.ebi.ac.uk/QuickGO/GTerm?id=GO:2001242
8	7,8	regulation of intrinsic apoptotic signaling pathway in response to DNA damage by p53 class mediator	GO:1902165	3.82×10-2	9.50×10-2	0	0.4	1.05743	-10.6873	CD44|0.47	1	14	107	38520	http://www.ebi.ac.uk/QuickGO/GTerm?id=GO:1902165
8	6,7,8	regulation of microtubule polymerization	GO:0031113	1.86×10-3	1.56×10-2	0.44	0.68	1.05743	-10.6873	STMN1|1.67;CLIP1|1.66	2	23	107	38520	http://www.ebi.ac.uk/QuickGO/GTerm?id=GO:0031113
8	6,7,8	regulation of miRNA metabolic process	GO:2000628	2.20×10-2	6.88×10-2	0	0.4	1.05743	-10.6873	PNPT1|0.69	1	8	107	38520	http://www.ebi.ac.uk/QuickGO/GTerm?id=GO:2000628
8	6,7,8	regulation of mRNA metabolic process	GO:1903311	4.75×10-2	1.07×10-1	-0.32	0.2	1.05743	-10.6873	C1QBP|0.7;PNPT1|0.69	2	125	107	38520	http://www.ebi.ac.uk/QuickGO/GTerm?id=GO:1903311
8	8	regulation of myosin-light-chain-phosphatase activity	GO:0035507	8.31×10-3	3.76×10-2	0	0.4	1.05743	-10.6873	PPP1R12A|1.54	1	3	107	38520	http://www.ebi.ac.uk/QuickGO/GTerm?id=GO:0035507
8	7,8	regulation of nucleocytoplasmic transport	GO:0046822	1.87×10-2	6.30×10-2	0.18	0.51	1.05743	-10.6873	SRI|1.57;PPP1R12A|1.54;PARP1|0.66	3	201	107	38520	http://www.ebi.ac.uk/QuickGO/GTerm?id=GO:0046822
8	6,7,8	regulation of protein kinase B signaling	GO:0051896	4.96×10-2	1.09×10-1	-0.34	0.19	1.05743	-10.6873	C1QBP|0.7;MYDGF|0.65	2	128	107	38520	http://www.ebi.ac.uk/QuickGO/GTerm?id=GO:0051896
8	7,8	regulation of protein modification by small protein conjugation or removal	GO:1903320	4.69×10-2	1.06×10-1	-0.24	0.25	1.05743	-10.6873	PSMA1|1.74;CDK1|0.69;DNAJA3|0.69	3	289	107	38520	http://www.ebi.ac.uk/QuickGO/GTerm?id=GO:1903320
8	7,8	regulation of protein phosphorylation	GO:0001932	5.12×10-3	2.96×10-2	-2.15	-0.94	1.05743	-10.6873	CDKN2A|1.86;SLK|1.69;DBNL|1.6;ITGA5|0.73;HDAC2|0.73;CSPG4|0.69;CDK1|0.69;DNAJA3|0.69;PHB2|0.67;MYDGF|0.65;CD44|0.47	11	1607	107	38520	http://www.ebi.ac.uk/QuickGO/GTerm?id=GO:0001932
8	7,8	regulation of Schwann cell differentiation	GO:0014038	8.31×10-3	3.76×10-2	0	0.4	1.05743	-10.6873	CDK1|0.69	1	3	107	38520	http://www.ebi.ac.uk/QuickGO/GTerm?id=GO:0014038
8	4,7,8	regulation of sequence-specific DNA binding transcription factor activity	GO:0051090	5.22×10-3	2.96×10-2	-0.87	-0.14	1.05743	-10.6873	CDKN2A|1.86;SMARCA4|0.74;HDAC2|0.73;DNAJA3|0.69;PHB2|0.67	5	399	107	38520	http://www.ebi.ac.uk/QuickGO/GTerm?id=GO:0051090
8	7,8	regulation of striated muscle contraction	GO:0006942	2.62×10-3	1.95×10-2	-0.2	0.28	1.05743	-10.6873	SRI|1.57;ATP1B1|0.69;ASPH|0.63	3	98	107	38520	http://www.ebi.ac.uk/QuickGO/GTerm?id=GO:0006942
8	6,7,8	regulation of transcription during mitosis	GO:0045896	1.38×10-2	5.13×10-2	0	0.4	1.05743	-10.6873	SMARCA4|0.74	1	5	107	38520	http://www.ebi.ac.uk/QuickGO/GTerm?id=GO:0045896
8	7,8	regulation of transcription from RNA polymerase II promoter	GO:0006357	2.41×10-2	7.41×10-2	-2.24	-0.99	1.05743	-10.6873	GTF2F1|1.8;PPP1R12A|1.54;SMARCA4|0.74;HDAC2|0.73;YBX3|0.72;C1QBP|0.7;SMARCA5|0.7;ERLIN1|0.69;CDK1|0.69;DNAJA3|0.69;PARP1|0.66;MYDGF|0.65;TOP2A|0.6	13	2543	107	38520	http://www.ebi.ac.uk/QuickGO/GTerm?id=GO:0006357
8	6,7,8	regulation of translation	GO:0006417	2.05×10-2	6.64×10-2	-0.73	-0.05	1.05743	-10.6873	GIGYF2|1.72;YBX3|0.72;C1QBP|0.7;LARS2|0.64	4	373	107	38520	http://www.ebi.ac.uk/QuickGO/GTerm?id=GO:0006417
8	6,8	regulation of viral transcription	GO:0046782	1.80×10-3	1.53×10-2	-0.26	0.24	1.05743	-10.6873	GTF2F1|1.8;SMARCA4|0.74;SSRP1|0.5	3	86	107	38520	http://www.ebi.ac.uk/QuickGO/GTerm?id=GO:0046782
8	5,7,8	release of sequestered calcium ion into cytosol	GO:0051209	1.60×10-4	2.92×10-3	-0.79	-0.09	1.05743	-10.6873	SRI|1.57;CYBA|0.7;ASPH|0.63;ERO1L|0.58	4	97	107	38520	http://www.ebi.ac.uk/QuickGO/GTerm?id=GO:0051209
8	6,7,8	release of sequestered calcium ion into cytosol by sarcoplasmic reticulum	GO:0014808	3.59×10-3	2.34×10-2	0	0.41	1.05743	-10.6873	SRI|1.57;ASPH|0.63	2	32	107	38520	http://www.ebi.ac.uk/QuickGO/GTerm?id=GO:0014808
8	7,8	RNA 5'-end processing	GO:0000966	1.66×10-2	5.78×10-2	0	0.4	1.05743	-10.6873	PNPT1|0.69	1	6	107	38520	http://www.ebi.ac.uk/QuickGO/GTerm?id=GO:0000966
8	6,7,8	RNA import into mitochondrion	GO:0035927	8.31×10-3	3.76×10-2	0	0.4	1.05743	-10.6873	PNPT1|0.69	1	3	107	38520	http://www.ebi.ac.uk/QuickGO/GTerm?id=GO:0035927
8	7,8	RNA splicing	GO:0008380	3.04×10-3	2.08×10-2	-1.13	-0.31	1.05743	-10.6873	GTF2F1|1.8;SRRM1|1.69;C1QBP|0.7;HNRNPR|0.69;USP39|0.69;FUS|0.67	6	509	107	38520	http://www.ebi.ac.uk/QuickGO/GTerm?id=GO:0008380
8	8	senescence-associated heterochromatin focus assembly	GO:0035986	8.31×10-3	3.76×10-2	0	0.4	1.05743	-10.6873	CDKN2A|1.86	1	3	107	38520	http://www.ebi.ac.uk/QuickGO/GTerm?id=GO:0035986
8	4,8	signal transduction by protein phosphorylation	GO:0023014	2.59×10-2	7.69×10-2	-1.44	-0.5	1.05743	-10.6873	SLK|1.69;DBNL|1.6;CSPG4|0.69;CDK1|0.69;PHB2|0.67;MYDGF|0.65;CD44|0.47	7	1038	107	38520	http://www.ebi.ac.uk/QuickGO/GTerm?id=GO:0023014
8	6,8	sulfur amino acid catabolic process	GO:0000098	1.27×10-3	1.26×10-2	-0.38	0.16	1.05743	-10.6873	ETHE1|0.68;PCYOX1|0.61	2	19	107	38520	http://www.ebi.ac.uk/QuickGO/GTerm?id=GO:0000098
8	7,8	surfactant homeostasis	GO:0043129	3.28×10-2	8.77×10-2	0	0.4	1.05743	-10.6873	LPCAT1|0.74	1	12	107	38520	http://www.ebi.ac.uk/QuickGO/GTerm?id=GO:0043129
8	8	transcription elongation from RNA polymerase II promoter	GO:0006368	4.28×10-2	1.01×10-1	0.05	0.43	1.05743	-10.6873	GTF2F1|1.8;SSRP1|0.5	2	118	107	38520	http://www.ebi.ac.uk/QuickGO/GTerm?id=GO:0006368
8	7,8	translational termination	GO:0006415	1.68×10-2	5.84×10-2	-0.44	0.13	1.05743	-10.6873	MRPL21|0.74;MRPL54|0.72;AURKAIP1|0.68	3	193	107	38520	http://www.ebi.ac.uk/QuickGO/GTerm?id=GO:0006415
8	7,8	transmembrane receptor protein tyrosine kinase signaling pathway	GO:0007169	3.82×10-2	9.50×10-2	-1.12	-0.3	1.05743	-10.6873	GIGYF2|1.72;ATP6V0D1|0.74;ITGA5|0.73;HDAC2|0.73;CYBA|0.7;CSPG4|0.69;CDK1|0.69	7	1129	107	38520	http://www.ebi.ac.uk/QuickGO/GTerm?id=GO:0007169
8	7,8	tricarboxylic acid transport	GO:0006842	1.11×10-2	4.47×10-2	0	0.4	1.05743	-10.6873	SLC25A1|0.74	1	4	107	38520	http://www.ebi.ac.uk/QuickGO/GTerm?id=GO:0006842
8	7,8	tryptophan transport	GO:0015827	1.38×10-2	5.13×10-2	0	0.4	1.05743	-10.6873	SLC7A5|0.63	1	5	107	38520	http://www.ebi.ac.uk/QuickGO/GTerm?id=GO:0015827
8	7,8	very long-chain fatty-acyl-CoA metabolic process	GO:0036111	2.78×10-3	1.95×10-2	0	0.4	1.05743	-10.6873	HSD17B4|0.54	1	1	107	38520	http://www.ebi.ac.uk/QuickGO/GTerm?id=GO:0036111
9	5,8,9	acetyl-CoA biosynthetic process from pyruvate	GO:0006086	9.25×10-6	3.31×10-4	-0.44	0.13	1.05743	-10.6873	PDHA1|0.74;DLD|0.73;PDHB|0.67	3	15	107	38520	http://www.ebi.ac.uk/QuickGO/GTerm?id=GO:0006086
9	6,9	apoptotic nuclear changes	GO:0030262	5.57×10-3	2.96×10-2	-0.35	0.18	1.05743	-10.6873	AIFM1|0.74;TOP2A|0.6	2	40	107	38520	http://www.ebi.ac.uk/QuickGO/GTerm?id=GO:0030262
9	8,9	ATP metabolic process	GO:0046034	1.84×10-2	6.22×10-2	-0.56	0.05	1.05743	-10.6873	PDHA1|0.74;DLD|0.73;ATP5L|0.72;NDUFA10|0.71	4	361	107	38520	http://www.ebi.ac.uk/QuickGO/GTerm?id=GO:0046034
9	9	calcium ion homeostasis	GO:0055074	4.54×10-3	2.73×10-2	-0.95	-0.19	1.05743	-10.6873	SRI|1.57;CYBA|0.7;ATP1B1|0.69;ASPH|0.63;ERO1L|0.58	5	386	107	38520	http://www.ebi.ac.uk/QuickGO/GTerm?id=GO:0055074
9	5,7,9	cardiac conduction	GO:0061337	1.30×10-2	5.02×10-2	-0.03	0.38	1.05743	-10.6873	SRI|1.57;ATP1B1|0.69	2	62	107	38520	http://www.ebi.ac.uk/QuickGO/GTerm?id=GO:0061337
9	8,9	cellular divalent inorganic cation homeostasis	GO:0072503	4.74×10-3	2.81×10-2	-0.95	-0.19	1.05743	-10.6873	SRI|1.57;CYBA|0.7;ATP1B1|0.69;ASPH|0.63;ERO1L|0.58	5	390	107	38520	http://www.ebi.ac.uk/QuickGO/GTerm?id=GO:0072503
9	8,9	cellular metal ion homeostasis	GO:0006875	3.47×10-3	2.29×10-2	-1.08	-0.27	1.05743	-10.6873	SRI|1.57;ATP6V0D1|0.74;CYBA|0.7;ATP1B1|0.69;ASPH|0.63;ERO1L|0.58	6	523	107	38520	http://www.ebi.ac.uk/QuickGO/GTerm?id=GO:0006875
9	7,8,9	cellular response to glucose stimulus	GO:0071333	3.41×10-2	8.99×10-2	-0.04	0.38	1.05743	-10.6873	SRI|1.57;CYBA|0.7	2	104	107	38520	http://www.ebi.ac.uk/QuickGO/GTerm?id=GO:0071333
9	8,9	chaperone mediated protein folding requiring cofactor	GO:0051085	2.74×10-2	7.92×10-2	0	0.4	1.05743	-10.6873	ERO1L|0.58	1	10	107	38520	http://www.ebi.ac.uk/QuickGO/GTerm?id=GO:0051085
9	6,7,8,9	chondrocyte development involved in endochondral bone morphogenesis	GO:0003433	1.38×10-2	5.13×10-2	0	0.4	1.05743	-10.6873	SERPINH1|0.72	1	5	107	38520	http://www.ebi.ac.uk/QuickGO/GTerm?id=GO:0003433
9	5,7,8,9	chondrocyte differentiation involved in endochondral bone morphogenesis	GO:0003413	2.20×10-2	6.88×10-2	0	0.4	1.05743	-10.6873	SERPINH1|0.72	1	8	107	38520	http://www.ebi.ac.uk/QuickGO/GTerm?id=GO:0003413
9	8,9	citrate transport	GO:0015746	1.11×10-2	4.47×10-2	0	0.4	1.05743	-10.6873	SLC25A1|0.74	1	4	107	38520	http://www.ebi.ac.uk/QuickGO/GTerm?id=GO:0015746
9	6,9	dermatan sulfate biosynthetic process	GO:0030208	3.28×10-2	8.77×10-2	0	0.4	1.05743	-10.6873	CSPG4|0.69	1	12	107	38520	http://www.ebi.ac.uk/QuickGO/GTerm?id=GO:0030208
9	8,9	divalent metal ion transport	GO:0070838	3.76×10-2	9.50×10-2	-0.95	-0.19	1.05743	-10.6873	SRI|1.57;CYBA|0.7;ATP1B1|0.69;ASPH|0.63;ERO1L|0.58	5	662	107	38520	http://www.ebi.ac.uk/QuickGO/GTerm?id=GO:0070838
9	8,9	DNA unwinding involved in DNA replication	GO:0006268	3.82×10-2	9.50×10-2	0	0.4	1.05743	-10.6873	TOP2A|0.6	1	14	107	38520	http://www.ebi.ac.uk/QuickGO/GTerm?id=GO:0006268
9	7,9	glutamine family amino acid biosynthetic process	GO:0009084	9.61×10-3	4.12×10-2	-0.28	0.23	1.05743	-10.6873	OAT|0.73;GLS|0.72	2	53	107	38520	http://www.ebi.ac.uk/QuickGO/GTerm?id=GO:0009084
9	7,9	leucine catabolic process	GO:0006552	1.38×10-2	5.13×10-2	0	0.4	1.05743	-10.6873	MCCC2|0.64	1	5	107	38520	http://www.ebi.ac.uk/QuickGO/GTerm?id=GO:0006552
9	8,9	long-chain fatty-acyl-CoA biosynthetic process	GO:0035338	1.55×10-3	1.44×10-2	-0.26	0.24	1.05743	-10.6873	SLC25A1|0.74;TECR|0.74	2	21	107	38520	http://www.ebi.ac.uk/QuickGO/GTerm?id=GO:0035338
9	9	macrophage apoptotic process	GO:0071888	2.74×10-2	7.92×10-2	0	0.4	1.05743	-10.6873	CDKN2A|1.86	1	10	107	38520	http://www.ebi.ac.uk/QuickGO/GTerm?id=GO:0071888
9	6,8,9	maintenance of chromatin silencing	GO:0006344	1.11×10-2	4.47×10-2	0	0.4	1.05743	-10.6873	HDAC2|0.73	1	4	107	38520	http://www.ebi.ac.uk/QuickGO/GTerm?id=GO:0006344
9	5,6,7,8,9	MDA-5 signaling pathway	GO:0039530	2.47×10-2	7.44×10-2	0	0.4	1.05743	-10.6873	C1QBP|0.7	1	9	107	38520	http://www.ebi.ac.uk/QuickGO/GTerm?id=GO:0039530
9	7,8,9	microtubule depolymerization	GO:0007019	8.92×10-3	3.93×10-2	-0.07	0.36	1.05743	-10.6873	STMN1|1.67;KIF2A|0.71	2	51	107	38520	http://www.ebi.ac.uk/QuickGO/GTerm?id=GO:0007019
9	7,8,9	microtubule polymerization	GO:0046785	1.55×10-2	5.65×10-2	0.44	0.68	1.05743	-10.6873	STMN1|1.67;CLIP1|1.66	2	68	107	38520	http://www.ebi.ac.uk/QuickGO/GTerm?id=GO:0046785
9	8,9	miRNA catabolic process	GO:0010587	1.38×10-2	5.13×10-2	0	0.4	1.05743	-10.6873	PNPT1|0.69	1	5	107	38520	http://www.ebi.ac.uk/QuickGO/GTerm?id=GO:0010587
9	6,7,8,9	mitochondrial electron transport, NADH to ubiquinone	GO:0006120	1.03×10-2	4.38×10-2	-0.29	0.22	1.05743	-10.6873	DLD|0.73;NDUFA10|0.71	2	55	107	38520	http://www.ebi.ac.uk/QuickGO/GTerm?id=GO:0006120
9	8,9	mitochondrial mRNA catabolic process	GO:0000958	5.55×10-3	2.96×10-2	0	0.4	1.05743	-10.6873	PNPT1|0.69	1	2	107	38520	http://www.ebi.ac.uk/QuickGO/GTerm?id=GO:0000958
9	6,7,8,9	mitochondrial respiratory chain complex I assembly	GO:0032981	1.14×10-3	1.16×10-2	-0.32	0.2	1.05743	-10.6873	AIFM1|0.74;ACAD9|0.64	2	18	107	38520	http://www.ebi.ac.uk/QuickGO/GTerm?id=GO:0032981
9	6,7,8,9	mitochondrial translational termination	GO:0070126	1.80×10-3	1.53×10-2	-0.44	0.13	1.05743	-10.6873	MRPL21|0.74;MRPL54|0.72;AURKAIP1|0.68	3	86	107	38520	http://www.ebi.ac.uk/QuickGO/GTerm?id=GO:0070126
9	8,9	mRNA 3'-end processing	GO:0031124	4.89×10-2	1.08×10-1	-0.07	0.36	1.05743	-10.6873	SRRM1|1.69;PNPT1|0.69	2	127	107	38520	http://www.ebi.ac.uk/QuickGO/GTerm?id=GO:0031124
9	6,7,8,9	negative regulation of androgen receptor signaling pathway	GO:0060766	3.55×10-2	9.17×10-2	0	0.4	1.05743	-10.6873	SMARCA4|0.74	1	13	107	38520	http://www.ebi.ac.uk/QuickGO/GTerm?id=GO:0060766
9	6,7,9	negative regulation of cholesterol biosynthetic process	GO:0045541	1.38×10-2	5.13×10-2	0	0.4	1.05743	-10.6873	ERLIN1|0.69	1	5	107	38520	http://www.ebi.ac.uk/QuickGO/GTerm?id=GO:0045541
9	8,9	negative regulation of cysteine-type endopeptidase activity	GO:2000117	4.03×10-2	9.87×10-2	-0.49	0.1	1.05743	-10.6873	DNAJA3|0.69;CD44|0.47	2	114	107	38520	http://www.ebi.ac.uk/QuickGO/GTerm?id=GO:2000117
9	5,7,8,9	negative regulation of DNA damage response, signal transduction by p53 class mediator	GO:0043518	3.55×10-2	9.17×10-2	0	0.4	1.05743	-10.6873	CD44|0.47	1	13	107	38520	http://www.ebi.ac.uk/QuickGO/GTerm?id=GO:0043518
9	6,7,8,9	negative regulation of endoplasmic reticulum stress-induced neuron intrinsic apoptotic signaling pathway	GO:1903382	5.55×10-3	2.96×10-2	0	0.4	1.05743	-10.6873	HYOU1|0.69	1	2	107	38520	http://www.ebi.ac.uk/QuickGO/GTerm?id=GO:1903382
9	7,8,9	negative regulation of G1/S transition of mitotic cell cycle	GO:2000134	4.21×10-3	2.58×10-2	0.13	0.48	1.05743	-10.6873	PSMA1|1.74;GIGYF2|1.72;SMARCA4|0.74	3	116	107	38520	http://www.ebi.ac.uk/QuickGO/GTerm?id=GO:2000134
9	5,7,8,9	negative regulation of hypoxia-induced intrinsic apoptotic signaling pathway	GO:1903298	8.31×10-3	3.76×10-2	0	0.4	1.05743	-10.6873	HYOU1|0.69	1	3	107	38520	http://www.ebi.ac.uk/QuickGO/GTerm?id=GO:1903298
9	6,8,9	negative regulation of interferon-gamma-mediated signaling pathway	GO:0060336	1.38×10-2	5.13×10-2	0	0.4	1.05743	-10.6873	DNAJA3|0.69	1	5	107	38520	http://www.ebi.ac.uk/QuickGO/GTerm?id=GO:0060336
9	6,7,8,9	negative regulation of intracellular estrogen receptor signaling pathway	GO:0033147	3.28×10-2	8.77×10-2	0	0.4	1.05743	-10.6873	PHB2|0.67	1	12	107	38520	http://www.ebi.ac.uk/QuickGO/GTerm?id=GO:0033147
9	7,8,9	negative regulation of intrinsic apoptotic signaling pathway by p53 class mediator	GO:1902254	4.62×10-2	1.05×10-1	0	0.4	1.05743	-10.6873	CD44|0.47	1	17	107	38520	http://www.ebi.ac.uk/QuickGO/GTerm?id=GO:1902254
9	6,7,8,9	negative regulation of MDA-5 signaling pathway	GO:0039534	8.31×10-3	3.76×10-2	0	0.4	1.05743	-10.6873	C1QBP|0.7	1	3	107	38520	http://www.ebi.ac.uk/QuickGO/GTerm?id=GO:0039534
9	7,8,9	negative regulation of microtubule polymerization	GO:0031115	2.74×10-2	7.92×10-2	0	0.4	1.05743	-10.6873	STMN1|1.67	1	10	107	38520	http://www.ebi.ac.uk/QuickGO/GTerm?id=GO:0031115
9	5,8,9	negative regulation of sequence-specific DNA binding transcription factor activity	GO:0043433	6.45×10-4	7.98×10-3	-0.74	-0.06	1.05743	-10.6873	CDKN2A|1.86;HDAC2|0.73;DNAJA3|0.69;PHB2|0.67	4	140	107	38520	http://www.ebi.ac.uk/QuickGO/GTerm?id=GO:0043433
9	7,8,9	negative regulation of transcription during mitosis	GO:0007068	5.55×10-3	2.96×10-2	0	0.4	1.05743	-10.6873	SMARCA4|0.74	1	2	107	38520	http://www.ebi.ac.uk/QuickGO/GTerm?id=GO:0007068
9	7,8,9	negative regulation of transcription from RNA polymerase II promoter	GO:0000122	3.04×10-2	8.39×10-2	-0.91	-0.16	1.05743	-10.6873	SMARCA4|0.74;HDAC2|0.73;YBX3|0.72;C1QBP|0.7;DNAJA3|0.69;PARP1|0.66	6	843	107	38520	http://www.ebi.ac.uk/QuickGO/GTerm?id=GO:0000122
9	6,8,9	pattern recognition receptor signaling pathway	GO:0002221	2.72×10-3	1.95×10-2	-0.63	0.01	1.05743	-10.6873	C1QBP|0.7;CYBA|0.7;CTSS|0.7;CDK1|0.69	4	207	107	38520	http://www.ebi.ac.uk/QuickGO/GTerm?id=GO:0002221
9	8,9	peptidyl-aspartic acid hydroxylation	GO:0042264	5.55×10-3	2.96×10-2	0	0.4	1.05743	-10.6873	ASPH|0.63	1	2	107	38520	http://www.ebi.ac.uk/QuickGO/GTerm?id=GO:0042264
9	8,9	phosphatidylinositol 3-kinase signaling	GO:0014065	3.77×10-2	9.50×10-2	-0.34	0.19	1.05743	-10.6873	C1QBP|0.7;MYDGF|0.65	2	110	107	38520	http://www.ebi.ac.uk/QuickGO/GTerm?id=GO:0014065
9	8,9	polyadenylation-dependent mRNA catabolic process	GO:0071047	2.78×10-3	1.95×10-2	0	0.4	1.05743	-10.6873	PNPT1|0.69	1	1	107	38520	http://www.ebi.ac.uk/QuickGO/GTerm?id=GO:0071047
9	7,8,9	positive regulation by host of viral transcription	GO:0043923	3.28×10-2	8.77×10-2	0	0.4	1.05743	-10.6873	SMARCA4|0.74	1	12	107	38520	http://www.ebi.ac.uk/QuickGO/GTerm?id=GO:0043923
9	8,9	positive regulation of cysteine-type endopeptidase activity	GO:2001056	1.33×10-3	1.28×10-2	-0.65	0	1.05743	-10.6873	AIFM1|0.74;NDUFA13|0.7;DNAJA3|0.69;ASPH|0.63	4	170	107	38520	http://www.ebi.ac.uk/QuickGO/GTerm?id=GO:2001056
9	8,9	positive regulation of macrophage apoptotic process	GO:2000111	8.31×10-3	3.76×10-2	0	0.4	1.05743	-10.6873	CDKN2A|1.86	1	3	107	38520	http://www.ebi.ac.uk/QuickGO/GTerm?id=GO:2000111
9	6,7,8,9	positive regulation of MAPK cascade	GO:0043410	6.49×10-3	3.34×10-2	-1.22	-0.36	1.05743	-10.6873	DBNL|1.6;CSPG4|0.69;CDK1|0.69;PHB2|0.67;MYDGF|0.65;CD44|0.47	6	596	107	38520	http://www.ebi.ac.uk/QuickGO/GTerm?id=GO:0043410
9	6,7,8,9	positive regulation of miRNA metabolic process	GO:2000630	1.38×10-2	5.13×10-2	0	0.4	1.05743	-10.6873	PNPT1|0.69	1	5	107	38520	http://www.ebi.ac.uk/QuickGO/GTerm?id=GO:2000630
9	6,7,8,9	positive regulation of mitochondrial translation	GO:0070131	1.66×10-2	5.78×10-2	0	0.4	1.05743	-10.6873	C1QBP|0.7	1	6	107	38520	http://www.ebi.ac.uk/QuickGO/GTerm?id=GO:0070131
9	7,8,9	positive regulation of protein modification by small protein conjugation or removal	GO:1903322	1.36×10-2	5.13×10-2	-0.24	0.25	1.05743	-10.6873	PSMA1|1.74;CDK1|0.69;DNAJA3|0.69	3	178	107	38520	http://www.ebi.ac.uk/QuickGO/GTerm?id=GO:1903322
9	8,9	positive regulation of protein ubiquitination involved in ubiquitin-dependent protein catabolic process	GO:2000060	2.45×10-2	7.44×10-2	-0.08	0.35	1.05743	-10.6873	PSMA1|1.74;CDK1|0.69	2	87	107	38520	http://www.ebi.ac.uk/QuickGO/GTerm?id=GO:2000060
9	6,9	positive regulation of systemic arterial blood pressure	GO:0003084	3.01×10-2	8.34×10-2	0	0.4	1.05743	-10.6873	CYBA|0.7	1	11	107	38520	http://www.ebi.ac.uk/QuickGO/GTerm?id=GO:0003084
9	7,8,9	positive regulation of transcription from RNA polymerase II promoter	GO:0045944	1.83×10-2	6.18×10-2	-1.46	-0.51	1.05743	-10.6873	GTF2F1|1.8;PPP1R12A|1.54;SMARCA4|0.74;HDAC2|0.73;ERLIN1|0.69;PARP1|0.66;MYDGF|0.65;TOP2A|0.6	8	1193	107	38520	http://www.ebi.ac.uk/QuickGO/GTerm?id=GO:0045944
9	6,7,8,9	positive regulation of transcription, DNA-templated	GO:0045893	1.82×10-2	6.18×10-2	-1.84	-0.74	1.05743	-10.6873	GTF2F1|1.8;PPP1R12A|1.54;SMARCA4|0.74;HDAC2|0.73;ERLIN1|0.69;PHB2|0.67;PARP1|0.66;MYDGF|0.65;ASPH|0.63;TOP2A|0.6	10	1675	107	38520	http://www.ebi.ac.uk/QuickGO/GTerm?id=GO:0045893
9	8,9	prenylated protein catabolic process	GO:0030327	1.38×10-2	5.13×10-2	0	0.4	1.05743	-10.6873	PCYOX1|0.61	1	5	107	38520	http://www.ebi.ac.uk/QuickGO/GTerm?id=GO:0030327
9	8,9	protein homotetramerization	GO:0051289	1.46×10-2	5.39×10-2	-0.29	0.22	1.05743	-10.6873	GLS|0.72;HM13|0.71	2	66	107	38520	http://www.ebi.ac.uk/QuickGO/GTerm?id=GO:0051289
9	9	protein localization to kinetochore	GO:0034501	2.74×10-2	7.92×10-2	0	0.4	1.05743	-10.6873	CDK1|0.69	1	10	107	38520	http://www.ebi.ac.uk/QuickGO/GTerm?id=GO:0034501
9	6,9	protein N-linked glycosylation via asparagine	GO:0018279	4.34×10-4	6.00×10-3	-0.61	0.02	1.05743	-10.6873	DDOST|0.74;STT3A|0.73;MLEC|0.71;GANAB|0.64	4	126	107	38520	http://www.ebi.ac.uk/QuickGO/GTerm?id=GO:0018279
9	6,9	protein poly-ADP-ribosylation	GO:0070212	8.31×10-3	3.76×10-2	0	0.4	1.05743	-10.6873	PARP1|0.66	1	3	107	38520	http://www.ebi.ac.uk/QuickGO/GTerm?id=GO:0070212
9	9	protein sumoylation	GO:0016925	3.53×10-2	9.17×10-2	-0.34	0.19	1.05743	-10.6873	NUP210|0.69;PARP1|0.66	2	106	107	38520	http://www.ebi.ac.uk/QuickGO/GTerm?id=GO:0016925
9	7,8,9	protein transport into plasma membrane raft	GO:0044861	2.29×10-5	6.77×10-4	-0.06	0.37	1.05743	-10.6873	CLIP1|1.66;ATP1B1|0.69	2	3	107	38520	http://www.ebi.ac.uk/QuickGO/GTerm?id=GO:0044861
9	5,6,7,8,9	regulation of apoptotic DNA fragmentation	GO:1902510	1.93×10-2	6.37×10-2	0	0.4	1.05743	-10.6873	AIFM1|0.74	1	7	107	38520	http://www.ebi.ac.uk/QuickGO/GTerm?id=GO:1902510
9	8,9	regulation of calcium:sodium antiporter activity	GO:1903279	8.31×10-3	3.76×10-2	0	0.4	1.05743	-10.6873	ATP1B1|0.69	1	3	107	38520	http://www.ebi.ac.uk/QuickGO/GTerm?id=GO:1903279
9	7,8,9	regulation of cardiac muscle contraction	GO:0055117	1.57×10-3	1.44×10-2	-0.2	0.28	1.05743	-10.6873	SRI|1.57;ATP1B1|0.69;ASPH|0.63	3	82	107	38520	http://www.ebi.ac.uk/QuickGO/GTerm?id=GO:0055117
9	8,9	regulation of cardiac muscle contraction by calcium ion signaling	GO:0010882	2.20×10-3	1.75×10-2	-0.36	0.18	1.05743	-10.6873	ATP1B1|0.69;ASPH|0.63	2	25	107	38520	http://www.ebi.ac.uk/QuickGO/GTerm?id=GO:0010882
9	6,7,8,9	regulation of cation transmembrane transport	GO:1904062	2.91×10-3	2.01×10-2	-0.71	-0.04	1.05743	-10.6873	SRI|1.57;CTSS|0.7;ATP1B1|0.69;ASPH|0.63	4	211	107	38520	http://www.ebi.ac.uk/QuickGO/GTerm?id=GO:1904062
9	7,9	regulation of cysteine-type endopeptidase activity involved in apoptotic process	GO:0043281	6.33×10-3	3.28×10-2	-0.77	-0.08	1.05743	-10.6873	AIFM1|0.74;NDUFA13|0.7;DNAJA3|0.69;CD44|0.47	4	263	107	38520	http://www.ebi.ac.uk/QuickGO/GTerm?id=GO:0043281
9	7,9	regulation of gliogenesis	GO:0014013	2.05×10-2	6.64×10-2	-0.3	0.22	1.05743	-10.6873	HDAC2|0.73;CDK1|0.69	2	79	107	38520	http://www.ebi.ac.uk/QuickGO/GTerm?id=GO:0014013
9	6,7,8,9	regulation of hypoxia-induced intrinsic apoptotic signaling pathway	GO:1903297	8.31×10-3	3.76×10-2	0	0.4	1.05743	-10.6873	HYOU1|0.69	1	3	107	38520	http://www.ebi.ac.uk/QuickGO/GTerm?id=GO:1903297
9	5,6,7,8,9	regulation of inositol 1,4,5-trisphosphate-sensitive calcium-release channel activity	GO:0031585	1.38×10-2	5.13×10-2	0	0.4	1.05743	-10.6873	ASPH|0.63	1	5	107	38520	http://www.ebi.ac.uk/QuickGO/GTerm?id=GO:0031585
9	6,7,8,9	regulation of MAPK cascade	GO:0043408	3.06×10-2	8.40×10-2	-1.22	-0.36	1.05743	-10.6873	DBNL|1.6;CSPG4|0.69;CDK1|0.69;PHB2|0.67;MYDGF|0.65;CD44|0.47	6	844	107	38520	http://www.ebi.ac.uk/QuickGO/GTerm?id=GO:0043408
9	6,8,9	regulation of metal ion transport	GO:0010959	2.48×10-2	7.46×10-2	-0.71	-0.04	1.05743	-10.6873	SRI|1.57;CYBA|0.7;ATP1B1|0.69;ASPH|0.63	4	396	107	38520	http://www.ebi.ac.uk/QuickGO/GTerm?id=GO:0010959
9	6,7,8,9	regulation of miRNA catabolic process	GO:2000625	2.78×10-3	1.95×10-2	0	0.4	1.05743	-10.6873	PNPT1|0.69	1	1	107	38520	http://www.ebi.ac.uk/QuickGO/GTerm?id=GO:2000625
9	6,8,9	regulation of mitochondrial RNA catabolic process	GO:0000960	1.11×10-2	4.47×10-2	0	0.4	1.05743	-10.6873	PNPT1|0.69	1	4	107	38520	http://www.ebi.ac.uk/QuickGO/GTerm?id=GO:0000960
9	6,7,8,9	regulation of mitochondrial translation	GO:0070129	2.74×10-2	7.92×10-2	0	0.4	1.05743	-10.6873	C1QBP|0.7	1	10	107	38520	http://www.ebi.ac.uk/QuickGO/GTerm?id=GO:0070129
9	7,8,9	regulation of monocyte aggregation	GO:1900623	8.31×10-3	3.76×10-2	0	0.4	1.05743	-10.6873	CD44|0.47	1	3	107	38520	http://www.ebi.ac.uk/QuickGO/GTerm?id=GO:1900623
9	4,6,8,9	regulation of mucus secretion	GO:0070255	2.74×10-2	7.92×10-2	0	0.4	1.05743	-10.6873	CYBA|0.7	1	10	107	38520	http://www.ebi.ac.uk/QuickGO/GTerm?id=GO:0070255
9	8,9	regulation of peptidyl-tyrosine phosphorylation	GO:0050730	3.16×10-3	2.14×10-2	-0.76	-0.07	1.05743	-10.6873	ITGA5|0.73;HDAC2|0.73;CSPG4|0.69;CD44|0.47	4	216	107	38520	http://www.ebi.ac.uk/QuickGO/GTerm?id=GO:0050730
9	8,9	regulation of pri-miRNA transcription from RNA polymerase II promoter	GO:1902893	8.31×10-3	3.76×10-2	0	0.4	1.05743	-10.6873	SMARCA4|0.74	1	3	107	38520	http://www.ebi.ac.uk/QuickGO/GTerm?id=GO:1902893
9	8,9	regulation of protein ubiquitination	GO:0031396	4.04×10-2	9.87×10-2	-0.24	0.25	1.05743	-10.6873	PSMA1|1.74;CDK1|0.69;DNAJA3|0.69	3	272	107	38520	http://www.ebi.ac.uk/QuickGO/GTerm?id=GO:0031396
9	9	regulation of renal output by angiotensin	GO:0002019	8.31×10-3	3.76×10-2	0	0.4	1.05743	-10.6873	CYBA|0.7	1	3	107	38520	http://www.ebi.ac.uk/QuickGO/GTerm?id=GO:0002019
9	8,9	regulation of ryanodine-sensitive calcium-release channel activity	GO:0060314	2.38×10-3	1.83×10-2	0	0.41	1.05743	-10.6873	SRI|1.57;ASPH|0.63	2	26	107	38520	http://www.ebi.ac.uk/QuickGO/GTerm?id=GO:0060314
9	6,7,8,9	regulation of single stranded viral RNA replication via double stranded DNA intermediate	GO:0045091	2.20×10-2	6.88×10-2	0	0.4	1.05743	-10.6873	TOP2A|0.6	1	8	107	38520	http://www.ebi.ac.uk/QuickGO/GTerm?id=GO:0045091
9	6,7,8,9	regulation of transcription from RNA polymerase II promoter, mitotic	GO:0046021	1.11×10-2	4.47×10-2	0	0.4	1.05743	-10.6873	SMARCA4|0.74	1	4	107	38520	http://www.ebi.ac.uk/QuickGO/GTerm?id=GO:0046021
9	5,6,7,8,9	regulation of viral-induced cytoplasmic pattern recognition receptor signaling pathway	GO:0039531	3.82×10-2	9.50×10-2	0	0.4	1.05743	-10.6873	C1QBP|0.7	1	14	107	38520	http://www.ebi.ac.uk/QuickGO/GTerm?id=GO:0039531
9	5,6,7,8,9	RIG-I signaling pathway	GO:0039529	4.09×10-2	9.87×10-2	0	0.4	1.05743	-10.6873	C1QBP|0.7	1	15	107	38520	http://www.ebi.ac.uk/QuickGO/GTerm?id=GO:0039529
9	8,9	RNA splicing, via transesterification reactions	GO:0000375	4.72×10-4	6.22×10-3	-1.13	-0.31	1.05743	-10.6873	GTF2F1|1.8;SRRM1|1.69;C1QBP|0.7;HNRNPR|0.69;USP39|0.69;FUS|0.67	6	353	107	38520	http://www.ebi.ac.uk/QuickGO/GTerm?id=GO:0000375
9	9	smooth muscle cell apoptotic process	GO:0034390	3.82×10-2	9.50×10-2	0	0.4	1.05743	-10.6873	CDKN2A|1.86	1	14	107	38520	http://www.ebi.ac.uk/QuickGO/GTerm?id=GO:0034390
9	9	transition metal ion homeostasis	GO:0055076	1.24×10-2	4.87×10-2	-0.2	0.28	1.05743	-10.6873	SRI|1.57;SFXN3|0.74;ATP6V0D1|0.74	3	172	107	38520	http://www.ebi.ac.uk/QuickGO/GTerm?id=GO:0055076
9	6,8,9	tRNA aminoacylation	GO:0043039	1.26×10-2	4.90×10-2	-0.49	0.1	1.05743	-10.6873	NARS2|0.72;CARS2|0.7;LARS2|0.64	3	173	107	38520	http://www.ebi.ac.uk/QuickGO/GTerm?id=GO:0043039
9	8,9	vascular endothelial growth factor receptor signaling pathway	GO:0048010	7.22×10-3	3.58×10-2	-0.45	0.12	1.05743	-10.6873	ITGA5|0.73;CYBA|0.7;CDK1|0.69	3	141	107	38520	http://www.ebi.ac.uk/QuickGO/GTerm?id=GO:0048010
10	9,10	calcium ion transport	GO:0006816	2.67×10-2	7.88×10-2	-0.95	-0.19	1.05743	-10.6873	SRI|1.57;CYBA|0.7;ATP1B1|0.69;ASPH|0.63;ERO1L|0.58	5	603	107	38520	http://www.ebi.ac.uk/QuickGO/GTerm?id=GO:0006816
10	9,10	cellular calcium ion homeostasis	GO:0006874	3.76×10-3	2.42×10-2	-0.95	-0.19	1.05743	-10.6873	SRI|1.57;CYBA|0.7;ATP1B1|0.69;ASPH|0.63;ERO1L|0.58	5	369	107	38520	http://www.ebi.ac.uk/QuickGO/GTerm?id=GO:0006874
10	9,10	cellular potassium ion homeostasis	GO:0030007	2.47×10-2	7.44×10-2	0	0.4	1.05743	-10.6873	ATP1B1|0.69	1	9	107	38520	http://www.ebi.ac.uk/QuickGO/GTerm?id=GO:0030007
10	9,10	cellular sodium ion homeostasis	GO:0006883	4.35×10-2	1.01×10-1	0	0.4	1.05743	-10.6873	ATP1B1|0.69	1	16	107	38520	http://www.ebi.ac.uk/QuickGO/GTerm?id=GO:0006883
10	8,10	glutamate biosynthetic process	GO:0006537	1.38×10-2	5.13×10-2	0	0.4	1.05743	-10.6873	GLS|0.72	1	5	107	38520	http://www.ebi.ac.uk/QuickGO/GTerm?id=GO:0006537
10	10	iron ion homeostasis	GO:0055072	6.02×10-3	3.17×10-2	-0.2	0.28	1.05743	-10.6873	SRI|1.57;SFXN3|0.74;ATP6V0D1|0.74	3	132	107	38520	http://www.ebi.ac.uk/QuickGO/GTerm?id=GO:0055072
10	6,7,8,9,10	mitochondrial mRNA 3'-end processing	GO:0090616	2.78×10-3	1.95×10-2	0	0.4	1.05743	-10.6873	PNPT1|0.69	1	1	107	38520	http://www.ebi.ac.uk/QuickGO/GTerm?id=GO:0090616
10	7,8,9,10	mitotic G1/S transition checkpoint	GO:0044819	2.20×10-2	6.88×10-2	0.48	0.7	1.05743	-10.6873	PSMA1|1.74;GIGYF2|1.72	2	82	107	38520	http://www.ebi.ac.uk/QuickGO/GTerm?id=GO:0044819
10	7,8,10	negative regulation of cysteine-type endopeptidase activity involved in apoptotic process	GO:0043154	3.84×10-2	9.51×10-2	-0.49	0.1	1.05743	-10.6873	DNAJA3|0.69;CD44|0.47	2	111	107	38520	http://www.ebi.ac.uk/QuickGO/GTerm?id=GO:0043154
10	5,8,10	negative regulation of heart rate	GO:0010459	2.74×10-2	7.92×10-2	0	0.4	1.05743	-10.6873	SRI|1.57	1	10	107	38520	http://www.ebi.ac.uk/QuickGO/GTerm?id=GO:0010459
10	6,9,10	negative regulation of NF-kappaB transcription factor activity	GO:0032088	1.72×10-2	5.93×10-2	-0.11	0.33	1.05743	-10.6873	CDKN2A|1.86;DNAJA3|0.69	2	72	107	38520	http://www.ebi.ac.uk/QuickGO/GTerm?id=GO:0032088
10	7,10	negative regulation of renal output by angiotensin	GO:0003083	2.78×10-3	1.95×10-2	0	0.4	1.05743	-10.6873	CYBA|0.7	1	1	107	38520	http://www.ebi.ac.uk/QuickGO/GTerm?id=GO:0003083
10	6,7,8,9,10	negative regulation of RIG-I signaling pathway	GO:0039536	8.31×10-3	3.76×10-2	0	0.4	1.05743	-10.6873	C1QBP|0.7	1	3	107	38520	http://www.ebi.ac.uk/QuickGO/GTerm?id=GO:0039536
10	7,8,9,10	negative regulation of ryanodine-sensitive calcium-release channel activity	GO:0060315	3.01×10-2	8.34×10-2	0	0.4	1.05743	-10.6873	SRI|1.57	1	11	107	38520	http://www.ebi.ac.uk/QuickGO/GTerm?id=GO:0060315
10	7,8,9,10	negative regulation of transcription from RNA polymerase II promoter during mitosis	GO:0007070	5.55×10-3	2.96×10-2	0	0.4	1.05743	-10.6873	SMARCA4|0.74	1	2	107	38520	http://www.ebi.ac.uk/QuickGO/GTerm?id=GO:0007070
10	9,10	nuclear polyadenylation-dependent mRNA catabolic process	GO:0071042	2.78×10-3	1.95×10-2	0	0.4	1.05743	-10.6873	PNPT1|0.69	1	1	107	38520	http://www.ebi.ac.uk/QuickGO/GTerm?id=GO:0071042
10	7,8,9,10	positive regulation of MAP kinase activity	GO:0043406	3.86×10-2	9.53×10-2	-0.2	0.27	1.05743	-10.6873	DBNL|1.6;CSPG4|0.69;CDK1|0.69	3	267	107	38520	http://www.ebi.ac.uk/QuickGO/GTerm?id=GO:0043406
10	6,7,8,9,10	positive regulation of microtubule polymerization	GO:0031116	3.28×10-2	8.77×10-2	0	0.4	1.05743	-10.6873	CLIP1|1.66	1	12	107	38520	http://www.ebi.ac.uk/QuickGO/GTerm?id=GO:0031116
10	6,7,9,10	positive regulation of mitochondrial RNA catabolic process	GO:0000962	5.55×10-3	2.96×10-2	0	0.4	1.05743	-10.6873	PNPT1|0.69	1	2	107	38520	http://www.ebi.ac.uk/QuickGO/GTerm?id=GO:0000962
10	8,9,10	positive regulation of peptidyl-tyrosine phosphorylation	GO:0050731	1.01×10-3	1.09×10-2	-0.76	-0.07	1.05743	-10.6873	ITGA5|0.73;HDAC2|0.73;CSPG4|0.69;CD44|0.47	4	158	107	38520	http://www.ebi.ac.uk/QuickGO/GTerm?id=GO:0050731
10	8,9,10	positive regulation of pri-miRNA transcription from RNA polymerase II promoter	GO:1902895	8.31×10-3	3.76×10-2	0	0.4	1.05743	-10.6873	SMARCA4|0.74	1	3	107	38520	http://www.ebi.ac.uk/QuickGO/GTerm?id=GO:1902895
10	8,9,10	positive regulation of protein ubiquitination	GO:0031398	1.11×10-2	4.47×10-2	-0.24	0.25	1.05743	-10.6873	PSMA1|1.74;CDK1|0.69;DNAJA3|0.69	3	165	107	38520	http://www.ebi.ac.uk/QuickGO/GTerm?id=GO:0031398
10	7,8,9,10	positive regulation of ryanodine-sensitive calcium-release channel activity	GO:0060316	1.93×10-2	6.37×10-2	0	0.4	1.05743	-10.6873	ASPH|0.63	1	7	107	38520	http://www.ebi.ac.uk/QuickGO/GTerm?id=GO:0060316
10	7,8,9,10	positive regulation of store-operated calcium channel activity	GO:1901341	4.88×10-2	1.08×10-1	0	0.4	1.05743	-10.6873	ASPH|0.63	1	18	107	38520	http://www.ebi.ac.uk/QuickGO/GTerm?id=GO:1901341
10	5,6,7,8,9,10	positive regulation of vascular endothelial growth factor receptor signaling pathway	GO:0030949	4.35×10-2	1.01×10-1	0	0.4	1.05743	-10.6873	ITGA5|0.73	1	16	107	38520	http://www.ebi.ac.uk/QuickGO/GTerm?id=GO:0030949
10	6,9,10	regulation of acetyl-CoA biosynthetic process from pyruvate	GO:0010510	4.50×10-6	1.96×10-4	-0.44	0.13	1.05743	-10.6873	PDHA1|0.74;DLD|0.73;PDHB|0.67	3	12	107	38520	http://www.ebi.ac.uk/QuickGO/GTerm?id=GO:0010510
10	5,6,7,8,9,10	regulation of branching involved in mammary gland duct morphogenesis	GO:0060762	1.66×10-2	5.78×10-2	0	0.4	1.05743	-10.6873	PHB2|0.67	1	6	107	38520	http://www.ebi.ac.uk/QuickGO/GTerm?id=GO:0060762
10	7,8,9,10	regulation of calcium ion transmembrane transport	GO:1903169	2.40×10-3	1.84×10-2	-0.2	0.28	1.05743	-10.6873	SRI|1.57;ATP1B1|0.69;ASPH|0.63	3	95	107	38520	http://www.ebi.ac.uk/QuickGO/GTerm?id=GO:1903169
10	7,9,10	regulation of calcium ion transport	GO:0051924	6.08×10-3	3.19×10-2	-0.71	-0.04	1.05743	-10.6873	SRI|1.57;CYBA|0.7;ATP1B1|0.69;ASPH|0.63	4	260	107	38520	http://www.ebi.ac.uk/QuickGO/GTerm?id=GO:0051924
10	7,8,9,10	regulation of cation channel activity	GO:2001257	3.81×10-3	2.43×10-2	-0.2	0.28	1.05743	-10.6873	SRI|1.57;CTSS|0.7;ASPH|0.63	3	112	107	38520	http://www.ebi.ac.uk/QuickGO/GTerm?id=GO:2001257
10	6,7,8,9,10	regulation of endoplasmic reticulum stress-induced neuron intrinsic apoptotic signaling pathway	GO:1903381	5.55×10-3	2.96×10-2	0	0.4	1.05743	-10.6873	HYOU1|0.69	1	2	107	38520	http://www.ebi.ac.uk/QuickGO/GTerm?id=GO:1903381
10	9,10	regulation of high voltage-gated calcium channel activity	GO:1901841	1.38×10-2	5.13×10-2	0	0.4	1.05743	-10.6873	SRI|1.57	1	5	107	38520	http://www.ebi.ac.uk/QuickGO/GTerm?id=GO:1901841
10	8,9,10	regulation of macrophage apoptotic process	GO:2000109	2.20×10-2	6.88×10-2	0	0.4	1.05743	-10.6873	CDKN2A|1.86	1	8	107	38520	http://www.ebi.ac.uk/QuickGO/GTerm?id=GO:2000109
10	6,7,8,9,10	regulation of MDA-5 signaling pathway	GO:0039533	1.66×10-2	5.78×10-2	0	0.4	1.05743	-10.6873	C1QBP|0.7	1	6	107	38520	http://www.ebi.ac.uk/QuickGO/GTerm?id=GO:0039533
10	8,9,10	regulation of protein ubiquitination involved in ubiquitin-dependent protein catabolic process	GO:2000058	2.94×10-2	8.34×10-2	-0.08	0.35	1.05743	-10.6873	PSMA1|1.74;CDK1|0.69	2	96	107	38520	http://www.ebi.ac.uk/QuickGO/GTerm?id=GO:2000058
10	6,7,8,9,10	regulation of RIG-I signaling pathway	GO:0039535	3.28×10-2	8.77×10-2	0	0.4	1.05743	-10.6873	C1QBP|0.7	1	12	107	38520	http://www.ebi.ac.uk/QuickGO/GTerm?id=GO:0039535
10	6,7,8,9,10	regulation of SMAD protein import into nucleus	GO:0060390	3.82×10-2	9.50×10-2	0	0.4	1.05743	-10.6873	PARP1|0.66	1	14	107	38520	http://www.ebi.ac.uk/QuickGO/GTerm?id=GO:0060390
10	8,9,10	regulation of smooth muscle cell apoptotic process	GO:0034391	3.82×10-2	9.50×10-2	0	0.4	1.05743	-10.6873	CDKN2A|1.86	1	14	107	38520	http://www.ebi.ac.uk/QuickGO/GTerm?id=GO:0034391
10	5,7,10	renal system process involved in regulation of blood volume	GO:0001977	4.62×10-2	1.05×10-1	0	0.4	1.05743	-10.6873	CYBA|0.7	1	17	107	38520	http://www.ebi.ac.uk/QuickGO/GTerm?id=GO:0001977
10	5,7,8,9,10	resolution of meiotic recombination intermediates	GO:0000712	4.35×10-2	1.01×10-1	0	0.4	1.05743	-10.6873	TOP2A|0.6	1	16	107	38520	http://www.ebi.ac.uk/QuickGO/GTerm?id=GO:0000712
10	9,10	RNA splicing, via transesterification reactions with bulged adenosine as nucleophile	GO:0000377	4.51×10-4	6.07×10-3	-1.13	-0.31	1.05743	-10.6873	GTF2F1|1.8;SRRM1|1.69;C1QBP|0.7;HNRNPR|0.69;USP39|0.69;FUS|0.67	6	350	107	38520	http://www.ebi.ac.uk/QuickGO/GTerm?id=GO:0000377
10	7,9,10	toll-like receptor signaling pathway	GO:0002224	1.26×10-2	4.90×10-2	-0.47	0.11	1.05743	-10.6873	CYBA|0.7;CTSS|0.7;CDK1|0.69	3	173	107	38520	http://www.ebi.ac.uk/QuickGO/GTerm?id=GO:0002224
10	7,9,10	tRNA aminoacylation for protein translation	GO:0006418	1.12×10-2	4.50×10-2	-0.49	0.1	1.05743	-10.6873	NARS2|0.72;CARS2|0.7;LARS2|0.64	3	166	107	38520	http://www.ebi.ac.uk/QuickGO/GTerm?id=GO:0006418
11	7,10,11	3'-UTR-mediated mRNA stabilization	GO:0070935	3.28×10-2	8.77×10-2	0	0.4	1.05743	-10.6873	YBX3|0.72	1	12	107	38520	http://www.ebi.ac.uk/QuickGO/GTerm?id=GO:0070935
11	8,9,10,11	activation of MAPK activity	GO:0000187	1.70×10-2	5.90×10-2	-0.2	0.27	1.05743	-10.6873	DBNL|1.6;CSPG4|0.69;CDK1|0.69	3	194	107	38520	http://www.ebi.ac.uk/QuickGO/GTerm?id=GO:0000187
11	8,9,10,11	activation of store-operated calcium channel activity	GO:0032237	4.62×10-2	1.05×10-1	0	0.4	1.05743	-10.6873	ASPH|0.63	1	17	107	38520	http://www.ebi.ac.uk/QuickGO/GTerm?id=GO:0032237
11	8,10,11	asparaginyl-tRNA aminoacylation	GO:0006421	2.74×10-2	7.92×10-2	0	0.4	1.05743	-10.6873	NARS2|0.72	1	10	107	38520	http://www.ebi.ac.uk/QuickGO/GTerm?id=GO:0006421
11	10,11	cellular iron ion homeostasis	GO:0006879	3.59×10-2	9.18×10-2	-0.07	0.36	1.05743	-10.6873	SRI|1.57;ATP6V0D1|0.74	2	107	107	38520	http://www.ebi.ac.uk/QuickGO/GTerm?id=GO:0006879
11	8,10,11	cysteinyl-tRNA aminoacylation	GO:0006423	2.47×10-2	7.44×10-2	0	0.4	1.05743	-10.6873	CARS2|0.7	1	9	107	38520	http://www.ebi.ac.uk/QuickGO/GTerm?id=GO:0006423
11	10,11	cytosolic calcium ion homeostasis	GO:0051480	6.41×10-3	3.31×10-2	-0.79	-0.09	1.05743	-10.6873	SRI|1.57;CYBA|0.7;ASPH|0.63;ERO1L|0.58	4	264	107	38520	http://www.ebi.ac.uk/QuickGO/GTerm?id=GO:0051480
11	10,11	cytosolic calcium ion transport	GO:0060401	4.34×10-4	6.00×10-3	-0.79	-0.09	1.05743	-10.6873	SRI|1.57;CYBA|0.7;ASPH|0.63;ERO1L|0.58	4	126	107	38520	http://www.ebi.ac.uk/QuickGO/GTerm?id=GO:0060401
11	8,10,11	leucyl-tRNA aminoacylation	GO:0006429	1.66×10-2	5.78×10-2	0	0.4	1.05743	-10.6873	LARS2|0.64	1	6	107	38520	http://www.ebi.ac.uk/QuickGO/GTerm?id=GO:0006429
11	7,9,11	L-proline biosynthetic process	GO:0055129	2.47×10-2	7.44×10-2	0	0.4	1.05743	-10.6873	OAT|0.73	1	9	107	38520	http://www.ebi.ac.uk/QuickGO/GTerm?id=GO:0055129
11	7,8,9,10,11	mitochondrial mRNA polyadenylation	GO:0097222	2.78×10-3	1.95×10-2	0	0.4	1.05743	-10.6873	PNPT1|0.69	1	1	107	38520	http://www.ebi.ac.uk/QuickGO/GTerm?id=GO:0097222
11	7,8,9,10,11	mitotic G1 DNA damage checkpoint	GO:0031571	2.15×10-2	6.88×10-2	0.48	0.7	1.05743	-10.6873	PSMA1|1.74;GIGYF2|1.72	2	81	107	38520	http://www.ebi.ac.uk/QuickGO/GTerm?id=GO:0031571
11	8,9,10,11	mRNA splicing, via spliceosome	GO:0000398	4.51×10-4	6.07×10-3	-1.13	-0.31	1.05743	-10.6873	GTF2F1|1.8;SRRM1|1.69;C1QBP|0.7;HNRNPR|0.69;USP39|0.69;FUS|0.67	6	350	107	38520	http://www.ebi.ac.uk/QuickGO/GTerm?id=GO:0000398
11	6,8,9,10,11	positive regulation of SMAD protein import into nucleus	GO:0060391	3.01×10-2	8.34×10-2	0	0.4	1.05743	-10.6873	PARP1|0.66	1	11	107	38520	http://www.ebi.ac.uk/QuickGO/GTerm?id=GO:0060391
11	8,9,10,11	positive regulation of smooth muscle cell apoptotic process	GO:0034393	2.20×10-2	6.88×10-2	0	0.4	1.05743	-10.6873	CDKN2A|1.86	1	8	107	38520	http://www.ebi.ac.uk/QuickGO/GTerm?id=GO:0034393
11	4,5,6,7,8,10,11	positive regulation of toll-like receptor signaling pathway	GO:0034123	4.88×10-2	1.08×10-1	0	0.4	1.05743	-10.6873	CYBA|0.7	1	18	107	38520	http://www.ebi.ac.uk/QuickGO/GTerm?id=GO:0034123
11	5,6,7,8,10,11	regulation of calcium ion transport into cytosol	GO:0010522	1.99×10-3	1.64×10-2	-0.2	0.28	1.05743	-10.6873	SRI|1.57;CYBA|0.7;ASPH|0.63	3	89	107	38520	http://www.ebi.ac.uk/QuickGO/GTerm?id=GO:0010522
11	6,8,11	regulation of glomerular filtration	GO:0003093	3.28×10-2	8.77×10-2	0	0.4	1.05743	-10.6873	CYBA|0.7	1	12	107	38520	http://www.ebi.ac.uk/QuickGO/GTerm?id=GO:0003093
11	5,6,10,11	sequestering of calcium ion	GO:0051208	1.87×10-4	3.25×10-3	-0.79	-0.09	1.05743	-10.6873	SRI|1.57;CYBA|0.7;ASPH|0.63;ERO1L|0.58	4	101	107	38520	http://www.ebi.ac.uk/QuickGO/GTerm?id=GO:0051208
11	9,10,11	sodium ion export	GO:0071436	2.74×10-2	7.92×10-2	0	0.4	1.05743	-10.6873	ATP1B1|0.69	1	10	107	38520	http://www.ebi.ac.uk/QuickGO/GTerm?id=GO:0071436
11	8,10,11	toll-like receptor 2 signaling pathway	GO:0034134	2.00×10-2	6.53×10-2	-0.32	0.2	1.05743	-10.6873	CYBA|0.7;CDK1|0.69	2	78	107	38520	http://www.ebi.ac.uk/QuickGO/GTerm?id=GO:0034134
12	11,12	positive regulation of cytosolic calcium ion concentration	GO:0007204	4.14×10-3	2.58×10-2	-0.79	-0.09	1.05743	-10.6873	SRI|1.57;CYBA|0.7;ASPH|0.63;ERO1L|0.58	4	233	107	38520	http://www.ebi.ac.uk/QuickGO/GTerm?id=GO:0007204
12	7,8,9,10,12	positive regulation of oligodendrocyte differentiation	GO:0048714	3.28×10-2	8.77×10-2	0	0.4	1.05743	-10.6873	HDAC2|0.73	1	12	107	38520	http://www.ebi.ac.uk/QuickGO/GTerm?id=GO:0048714
12	7,10,11,12	positive regulation of potassium ion import	GO:1903288	8.31×10-3	3.76×10-2	0	0.4	1.05743	-10.6873	ATP1B1|0.69	1	3	107	38520	http://www.ebi.ac.uk/QuickGO/GTerm?id=GO:1903288
12	7,8,9,10,11,12	positive regulation of sodium ion export	GO:1903275	1.11×10-2	4.47×10-2	0	0.4	1.05743	-10.6873	ATP1B1|0.69	1	4	107	38520	http://www.ebi.ac.uk/QuickGO/GTerm?id=GO:1903275
12	6,7,10,11,12	potassium ion import across plasma membrane	GO:1990573	8.31×10-3	3.76×10-2	0	0.4	1.05743	-10.6873	ATP1B1|0.69	1	3	107	38520	http://www.ebi.ac.uk/QuickGO/GTerm?id=GO:1990573
12	7,10,11,12	regulation of potassium ion import	GO:1903286	8.31×10-3	3.76×10-2	0	0.4	1.05743	-10.6873	ATP1B1|0.69	1	3	107	38520	http://www.ebi.ac.uk/QuickGO/GTerm?id=GO:1903286
12	6,7,8,9,11,12	regulation of release of sequestered calcium ion into cytosol	GO:0051279	9.96×10-4	1.09×10-2	-0.2	0.28	1.05743	-10.6873	SRI|1.57;CYBA|0.7;ASPH|0.63	3	70	107	38520	http://www.ebi.ac.uk/QuickGO/GTerm?id=GO:0051279
12	8,9,10,11,12	regulation of sodium ion export	GO:1903273	1.11×10-2	4.47×10-2	0	0.4	1.05743	-10.6873	ATP1B1|0.69	1	4	107	38520	http://www.ebi.ac.uk/QuickGO/GTerm?id=GO:1903273
12	5,6,7,8,9,11,12	regulation of toll-like receptor 2 signaling pathway	GO:0034135	1.93×10-2	6.37×10-2	0	0.4	1.05743	-10.6873	CYBA|0.7	1	7	107	38520	http://www.ebi.ac.uk/QuickGO/GTerm?id=GO:0034135
12	5,6,11,12	sequestering of iron ion	GO:0097577	5.55×10-3	2.96×10-2	0	0.4	1.05743	-10.6873	SRI|1.57	1	2	107	38520	http://www.ebi.ac.uk/QuickGO/GTerm?id=GO:0097577
12	10,11,12	sodium ion export from cell	GO:0036376	2.20×10-2	6.88×10-2	0	0.4	1.05743	-10.6873	ATP1B1|0.69	1	8	107	38520	http://www.ebi.ac.uk/QuickGO/GTerm?id=GO:0036376
13	8,9,10,11,12,13	positive regulation of sodium ion export from cell	GO:1903278	1.11×10-2	4.47×10-2	0	0.4	1.05743	-10.6873	ATP1B1|0.69	1	4	107	38520	http://www.ebi.ac.uk/QuickGO/GTerm?id=GO:1903278
13	5,6,7,8,9,10,12,13	positive regulation of toll-like receptor 2 signaling pathway	GO:0034137	8.31×10-3	3.76×10-2	0	0.4	1.05743	-10.6873	CYBA|0.7	1	3	107	38520	http://www.ebi.ac.uk/QuickGO/GTerm?id=GO:0034137
13	7,8,9,10,12,13	regulation of release of sequestered calcium ion into cytosol by sarcoplasmic reticulum	GO:0010880	2.56×10-3	1.94×10-2	0	0.41	1.05743	-10.6873	SRI|1.57;ASPH|0.63	2	27	107	38520	http://www.ebi.ac.uk/QuickGO/GTerm?id=GO:0010880
13	9,10,11,12,13	regulation of sodium ion export from cell	GO:1903276	1.11×10-2	4.47×10-2	0	0.4	1.05743	-10.6873	ATP1B1|0.69	1	4	107	38520	http://www.ebi.ac.uk/QuickGO/GTerm?id=GO:1903276
GO, Gene Ontology.
